# Supplementary material for: The RNA Polymerase II Factor RPAP1 Is Critical for Mediator-Driven Transcription and Cell Identity
Source: PubMed Central journal article supplement — Cell Rep. 2018 Jan 9;22(2):396–410. doi: 10.1016/j.celrep.2017.12.062 (PMC5775503; doi:10.1016/j.celrep.2017.12.062), 2018-01-09
Supplement: mmc7.pdf [file mmc7.pdf]

## The RNA Polymerase II Factor RPAP1 Is Critical for Mediator-Driven Transcription and Cell Identity

### Graphical Abstract

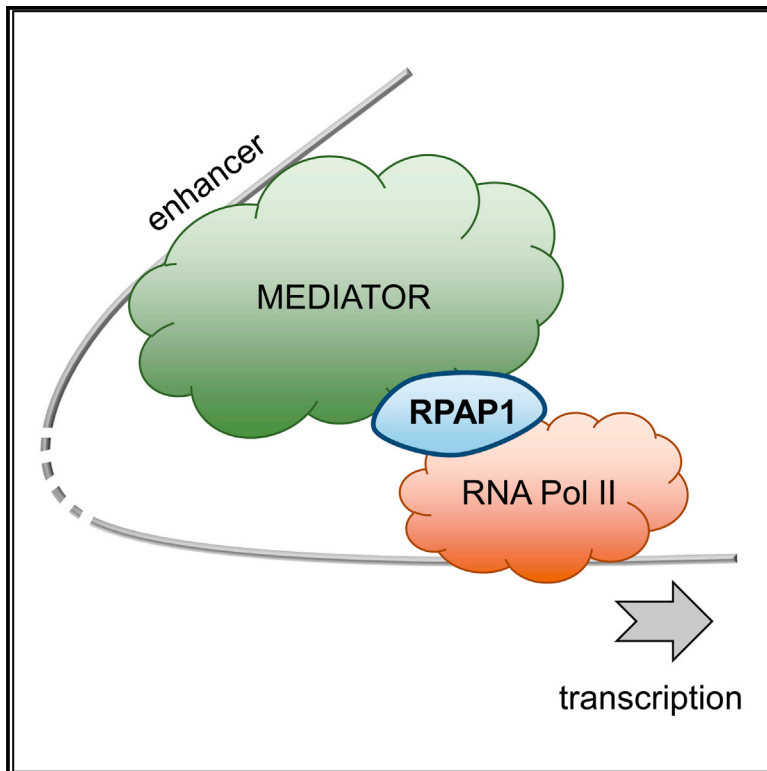

### Authors

Cian J. Lynch, Raquel Bernad, Isabel Calvo, ..., Enrique Rojo, Javier Munoz, Manuel Serrano

### Correspondence

manuel.serrano@irbbarcelona.org

### In Brief

Lynch et al. report a regulator of RNA Pol II called RPAP1, displaying functional conservation from plants to mammals. RPAP1 is required to establish and maintain cell identity. Mechanistically, RPAP1 is critical for the Mediator-RNA Pol II interaction, thereby preserving normal transcription at enhancer-driven genes.

### Highlights

- RPAP1 is an RNA Pol II regulator, conserved from plants to mammals
- RPAP1 depletion erases cell identity gene expression, triggering de-differentiation
- Mechanistically, RPAP1 is critical for the Mediator-RNA Pol II interaction
- RPAP1 preferentially contributes to enhancer-driven gene transcription

### Data and Software Availability

GSE78795  
PXD007114

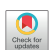

# The RNA Polymerase II Factor RPAP1 Is Critical for Mediator-Driven Transcription and Cell Identity

Cian J. Lynch,<sup>1,2</sup> Raquel Bernad,<sup>1,2</sup> Isabel Calvo,<sup>1</sup> Sandrina Nóbrega-Pereira,<sup>1,3</sup> Sergio Ruiz,<sup>4</sup> Nuria Ibarz,<sup>5</sup> Ana Martínez-Val,<sup>5</sup> Osvaldo Graña-Castro,<sup>6</sup> Gonzalo Gómez-López,<sup>6</sup> Eduardo Andrés-León,<sup>6,7</sup> Vladimir Espinosa Angarica,<sup>8,9</sup> Antonio del Sol,<sup>8</sup> Sagrario Ortega,<sup>10</sup> Oscar Fernández-Capetillo,<sup>4,11</sup> Enrique Rojo,<sup>12</sup> Javier Muñoz,<sup>5</sup> and Manuel Serrano<sup>1,2,13,14,\*</sup>

<sup>1</sup>Tumour Suppression Group, Spanish National Cancer Research Centre (CNIO), Madrid 28029, Spain

<sup>2</sup>Cellular Plasticity and Disease Group, Institute for Research in Biomedicine (IRB Barcelona), Barcelona Institute of Science and Technology (BIST), Barcelona 08028, Spain

<sup>3</sup>Instituto de Medicina Molecular, Faculdade de Medicina, Universidade de Lisboa, Lisboa 1649-028, Portugal

<sup>4</sup>Genomic Instability Group, Spanish National Cancer Research Centre (CNIO), Madrid 28029, Spain

<sup>5</sup>ProteoRed-ISCI Proteomics Unit, Spanish National Cancer Research Centre (CNIO), Madrid 28029, Spain

<sup>6</sup>Bioinformatics Unit, Spanish National Cancer Research Centre (CNIO), Madrid 28029, Spain

<sup>7</sup>Bioinformatics Unit, Institute of Parasitology and Biomedicine Lopez-Neyra, Granada 18016, Spain

<sup>8</sup>Luxembourg Centre for Systems Biomedicine (LCSB), University of Luxembourg, Belvaux, Luxembourg

<sup>9</sup>Cancer Science Institute, National University of Singapore, Singapore 117599, Singapore

<sup>10</sup>Transgenic Mouse Unit, Spanish National Cancer Research Centre (CNIO), Madrid 28029, Spain

<sup>11</sup>Science for Life Laboratory, Division of Genome Biology, Department of Medical Biochemistry and Biophysics, Karolinska Institute, Stockholm 171 21, Sweden

<sup>12</sup>Department of Plant Molecular Genetics, National Center of Biotechnology (CNB-CSIC), Madrid 280049, Spain

<sup>13</sup>Catalan Institution for Research and Advanced Studies (ICREA), Barcelona 08010, Spain

<sup>14</sup>Lead Contact

\*Correspondence: [manuel.serrano@irbbarcelona.org](mailto:manuel.serrano@irbbarcelona.org)

<https://doi.org/10.1016/j.celrep.2017.12.062>

## SUMMARY

The RNA polymerase II-associated protein 1 (RPAP1) is conserved across metazoa and required for stem cell differentiation in plants; however, very little is known about its mechanism of action or its role in mammalian cells. Here, we report that RPAP1 is essential for the expression of cell identity genes and for cell viability. Depletion of RPAP1 triggers cell de-differentiation, facilitates reprogramming toward pluripotency, and impairs differentiation. Mechanistically, we show that RPAP1 is essential for the interaction between RNA polymerase II (RNA Pol II) and Mediator, as well as for the recruitment of important regulators, such as the Mediator-specific RNA Pol II factor Gdown1 and the C-terminal domain (CTD) phosphatase RPAP2. In agreement, depletion of RPAP1 diminishes the loading of total and Ser5-phosphorylated RNA Pol II on many genes, with super-enhancer-driven genes among the most significantly downregulated. We conclude that Mediator/RPAP1/RNA Pol II is an ancient module, conserved from plants to mammals, critical for establishing and maintaining cell identity.

## INTRODUCTION

Coordinated regulation of RNA polymerase II (RNA Pol II) transcription is central to cell identity transitions and reflects a common developmental principle across the plant-animal divide (Gaillochet and Lohmann, 2015; Levine, 2011; Meyerowitz, 2002). High-throughput studies have recently revealed a set of conserved Pol-II-associated proteins (RPAP1, 2, 3, and 4) sharing multiple interactions among themselves (Jeronimo et al., 2004, 2007). RPAP2 is an atypical phosphatase that targets Ser5P on the RNA Pol II C-terminal domain (CTD) (Egloff et al., 2012a; Mosley et al., 2009), and RPAP2, RPAP3, and RPAP4 all have essential roles as nuclear transport chaperones for the RNA Pol II complex (Boulon et al., 2010; Forget et al., 2010, 2013). In contrast, the function of RPAP1 remains uncharacterized in mammals.

RPAP1 is a large (153-kDa) multidomain protein with a high degree of conservation across species (Jeronimo et al., 2004, 2007; Sanmartín et al., 2011). Studies in plants, yeasts, and mammals indicate that RPAP1 interacts with the RPB3 (official name POLR2C) and RPB11 (POLR2J) subunits of the RNA Pol II complex (Giaever et al., 2002; Ito et al., 2001; Jeronimo et al., 2004, 2007; Sanmartín et al., 2011). Importantly, the heterodimer RPB3/RPB11 provides a critical interface of RNA Pol II with the Mediator complex (Allen and Taatjes, 2015; Davis et al., 2002). Indeed, a high-throughput screen in yeast indicated that depletion of RPAP1 results in dramatic gene expression changes

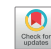

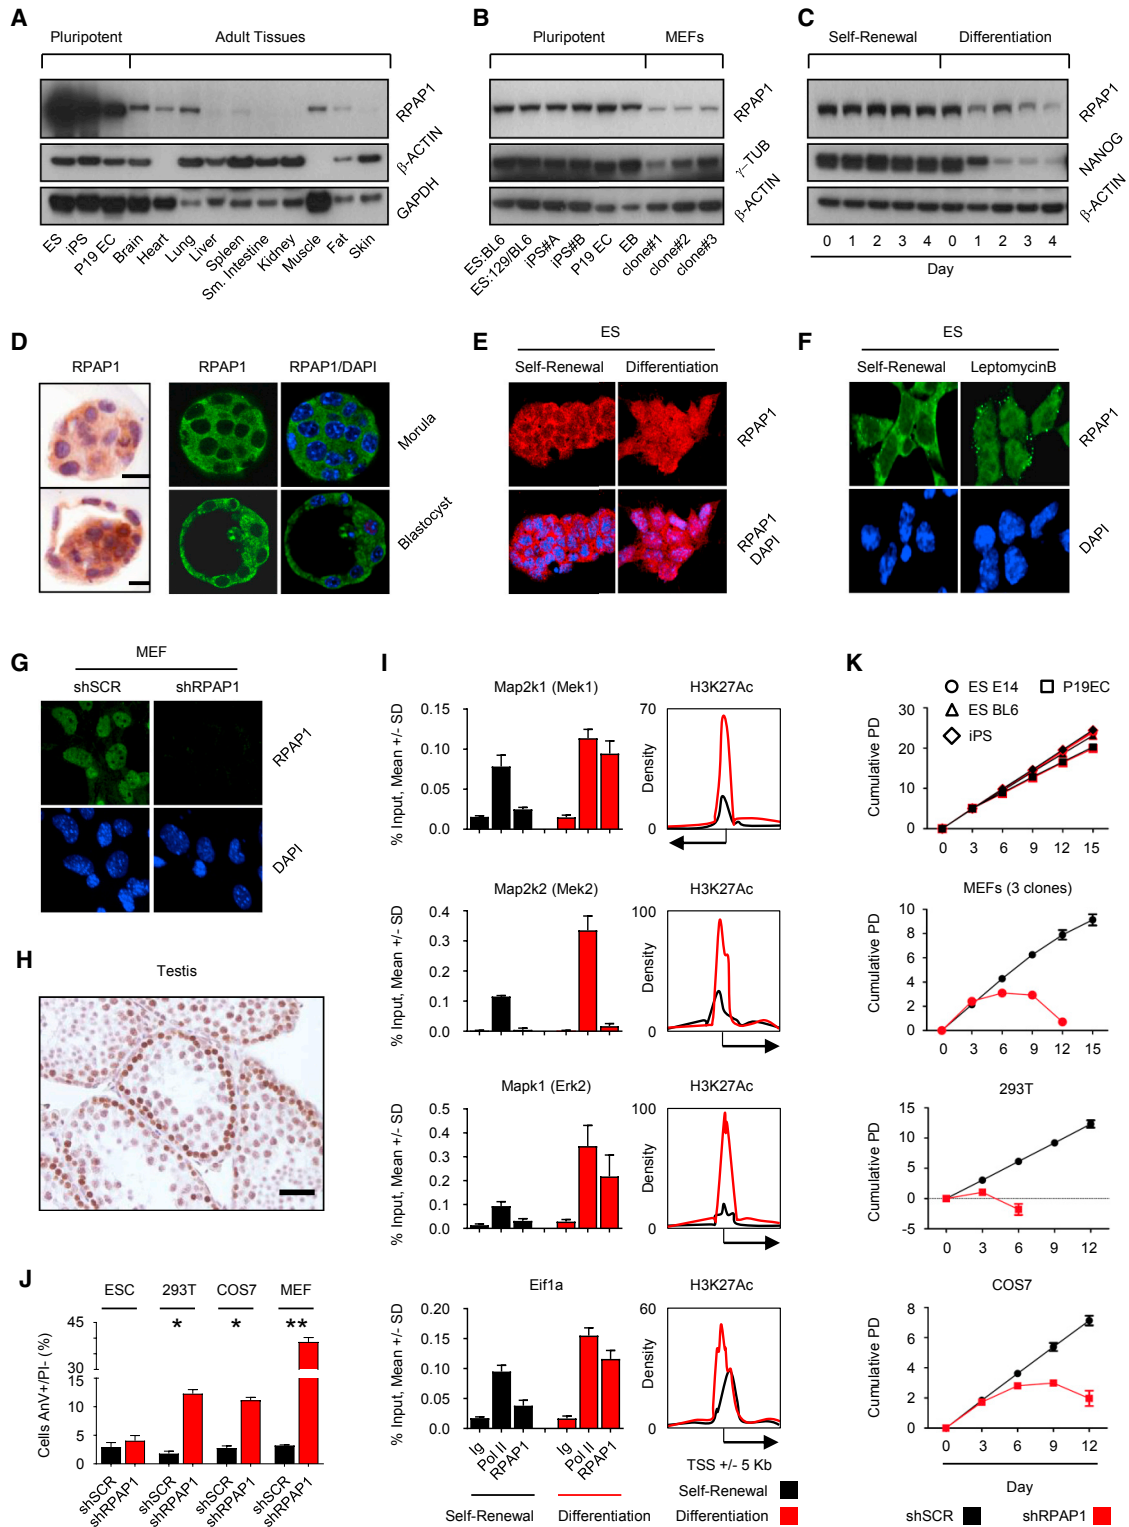

**Figure 1. RPAP1 Expression, Localization, and Requirement for Cell Viability**

(A and B) Western blot of RPAP1 expression in a range of pluripotent cell types versus adult tissues (A) or MEFs (B).

(C) Western blot of RPAP1 expression and the ESC marker NANOG during a time course of ESC differentiation by LIF removal and retinoic acid addition.

(D) Immunohistochemical and immunofluorescence staining for RPAP1 in mouse E3.0 morula (upper panel) or E4.0 blastocyst (lower panel). The scale bars represent 20 μm.

(legend continued on next page)

that were similar to depletion of the RNA Pol II subunit RPB11, although these changes were not characterized further (Jerónimo et al., 2004, 2007).

The multiprotein Mediator complex associates with transcriptional enhancers through protein-protein interactions, being critical for enhancer-promoter looping (Allen and Taatjes, 2015; Jerónimo and Robert, 2017). The largest accumulations of Mediator are in super-enhancers, and super-enhancer target genes are typically the most important for defining cell identity and the most heavily dependent on Mediator to drive their transcription by RNA Pol II (Allen and Taatjes, 2015; Hnisz et al., 2013; Kagey et al., 2010; Whyte et al., 2013).

RPAP1 was recently identified in plants as a critical factor for differentiation by promoting developmental gene expression (Muñoz et al., 2017; Sanmartín et al., 2011). Specifically, in *Arabidopsis*, RPAP1 was necessary and rate limiting to initiate stem cell differentiation (Sanmartín et al., 2011, 2012). Based on this, we hypothesized that mammalian RPAP1 may also coordinate gene expression and cell identity at a global level. Here, we characterize the mammalian homolog of RPAP1 to investigate putative roles in mammalian transcription and differentiation and reveal a mechanism involving direct RNA Pol II regulation through interaction with Mediator.

## RESULTS

### Mammalian RPAP1 Expression

The plant homolog of RPAP1 is highly expressed in stem cells compared to differentiated cells (Sanmartín et al., 2011). Based on this, we began by examining RPAP1 expression in pluripotent and differentiated mouse cells. Compared to adult tissues or mouse embryonic fibroblasts (MEFs), RPAP1 protein levels were high in embryonic stem cells (ESCs), induced pluripotent stem cells (iPSCs), embryo carcinoma (P19EC) cells, and embryoid bodies (EBs) (Figures 1A and 1B). Moreover, RPAP1 expression levels decreased during *in vitro* differentiation of ESCs by leukemia inhibitory factor (LIF) removal and retinoic acid addition (Figures 1C and S1A). In the case of plants, RPAP1 in stem cells is cytoplasmic and only enters into the nucleus upon differentiation, suggesting that RPAP1 functions as a differentiation switch (Sanmartín et al., 2011). Interestingly, we observed a similar behavior in mouse cells. In particular, RPAP1 was mostly cytoplasmic in the morula and blastocyst (Figure 1D), as well as in ESCs undergoing

self-renewal (Figures 1E and 1F). However, RPAP1 became partly nuclear upon ESC differentiation (Figure 1E) and completely nuclear in differentiated cells and tissues (Figures 1G, 1H, and S1B). Indeed, around gene promoters that become activated soon after launching differentiation, we could detect enrichment of RPAP1 coincident with an increase in H3K27Ac (Figure 1I). Moreover, treatment of ESCs with the nuclear export inhibitor leptomycin B produced rapid nuclear accumulation of RPAP1 (Figure 1F), which, similar to plants, is consistent with active nuclear export of RPAP1 during stem cell self-renewal. Therefore, mammalian RPAP1 shares similar expression and subcellular localization dynamics as observed in plants during the switch between self-renewal and differentiation.

### RPAP1 Is Essential for Cell Viability

To assess the relevance of RPAP1 in cells, we first identified short hairpin RNAs (shRNAs) that efficiently downregulated RPAP1 both in mouse and human cells (Figures 1G and S1C; see also below Figures 4 and S4). RPAP1 knockdown in non-pluripotent cells, such as human 293T, monkey COS7, various human cancer cell lines, murine MEFs, and immortalized primary hepatocytes, severely attenuated proliferation, induced senescence, and triggered apoptosis, typically with a delay of 2–6 days (Figures 1J, 1K, and S1D–S1G). These observations were recapitulated using a total of three different shRNAs against murine *Rpap1* mRNA (Figure S1F). In contrast to the above cell types, knockdown of RPAP1 expression had no effect on ESC viability during self-renewal (Figures 1J, 1K, S1C, S1D, and S1H). Considering the high levels of RPAP1 in ESCs, we wondered if shRNA-mediated depletion was not sufficient to reveal an essential role of RPAP1 on ESC viability. Indeed, we were unable to obtain viable ESC clones with complete *Rpap1* elimination using CRISPR technology. It is important to note that we successfully targeted the mouse and human RPAP1-encoding gene using multiple independent CRISPR delivery systems (transient, constitutive, or inducible), guide RNAs, and several wild-type mouse ESC lines or a haploid human cancer cell line (HAP1). In particular, we obtained many ESC clones where RPAP1 suffered small deletions but never a complete loss. Also, when using an ESC line with a LacZ reporter knocked in within intron 8 of the *Rpap1* gene, we were able to efficiently eliminate LacZ expression using guide RNAs against the first 7 exons of *Rpap1*; however, we never obtained clones with

(E–G) Immunofluorescence for RPAP1.

(E) ESCs undergoing self-renewal versus 24 hr differentiation by LIF removal.

(F) ESCs exposed to leptomycin B for 3 hr.

(G) MEFs at day 3 after lentiviral transduction with non-targeting control (shSCR) or with RPAP1 targeting (shRPAP1) shRNAs.

(H) Immunohistochemical staining for RPAP1 in mouse adult testis. The scale bar represents 30  $\mu$ m.

(I) Left panels show ChIP-qPCR for RNA Pol II or RPAP1 enrichment at promoters of the indicated genes. Analysis was performed on ESCs maintained in self-renewal conditions or after 24 hr of differentiation by LIF withdrawal and addition of retinoic acid (diff). See resources table in Supplemental Experimental Procedures for ChIP-qPCR primers. Panels on the right show the enhancer histone mark H3K27Ac enrichment surrounding each promoter (Creighton et al., 2010), where the enhancer is present in ESCs undergoing self-renewal and becomes activated after differentiation. Mean  $\pm$  SD; n = 3 technical replicates.

(J) Quantification of apoptosis by annexin V/propidium iodide co-staining and fluorescence-activated cell sorting (FACS) of the indicated cell lines at day 6 after lentiviral transduction with non-targeting control (shSCR) or with RPAP1 targeting (shRPAP1) shRNAs. Mean  $\pm$  SEM; n = 3 replicates; \*p < 0.05; \*\*p < 0.01.

(K) Proliferation curves (shown by cumulative population doubling) treated by control (shSCR) or lentiviral shRNA against RPAP1 in the indicated cell lines. Mean  $\pm$  SD; n = 3 biological replicates.

See also Figure S1.

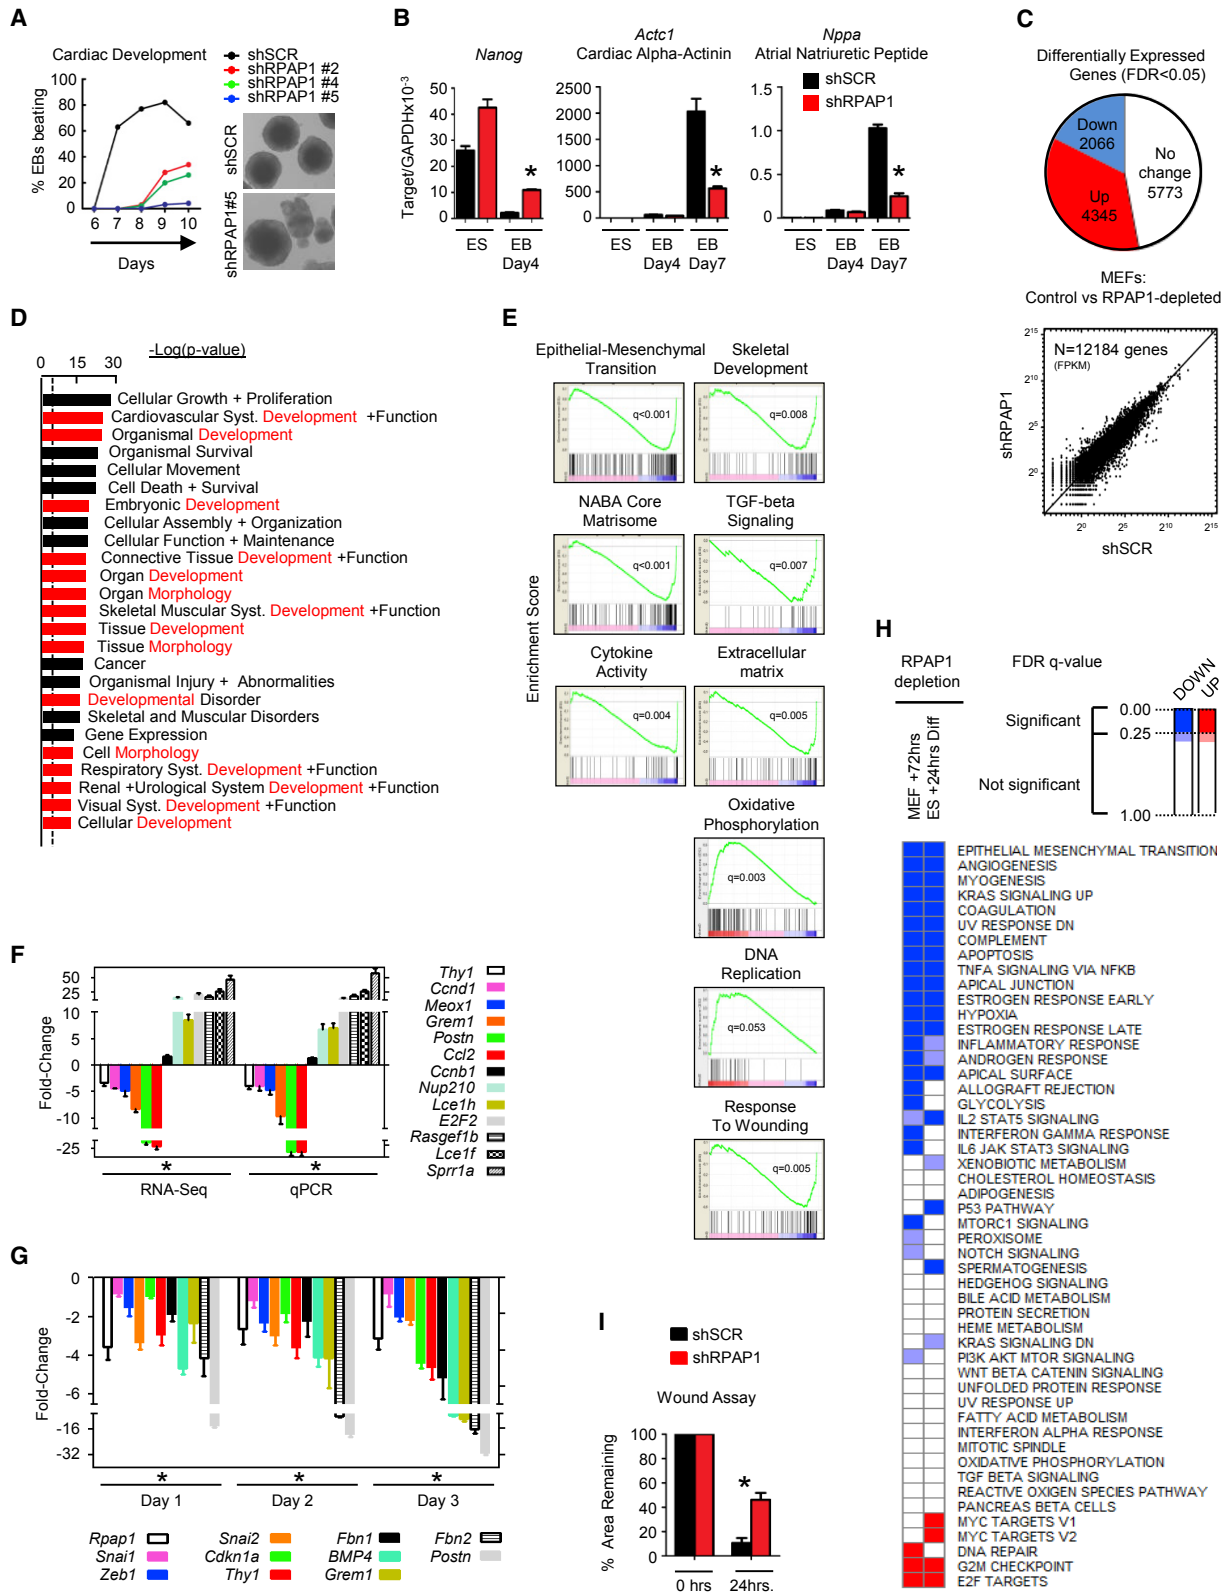

(legend on next page)



elimination of the remaining wild-type *Rpap1* allele (Figures S1–S1L; see [Experimental Procedures](#)). Taken together, the data suggest that RPAP1 performs an essential function in all the cell types tested, including ESCs.

### RPAP1 Depletion Impairs ESC Differentiation

Whereas strong shRNA depletion of RPAP1 did not affect pluripotent cells under self-renewal conditions (see above), we wondered if we could affect the activation of differentiation programs. For this, we first assessed differentiation by LIF removal for 24 or 72 hr (Savatie *et al.*, 1996). We observed that RPAP1-depleted ESCs presented a delayed differentiation based on the expression of pluripotency markers and morphological changes, followed by an increase in apoptosis (Figures S2A and S2B). Differentiation of ESCs to EBs by hanging-drop culture constitutes a longer term and more complex *in vitro* differentiation assay. RPAP1 depletion in ESCs followed by EB differentiation resulted in severely reduced efficiency of cardiac center development (formation of beating cell clusters) in EBs (Figure 2A). In agreement, analyses of RNA expression also revealed a delay in the loss of pluripotency markers and delayed induction of cardiac muscle differentiation markers associated with RPAP1-depleted EBs (Figures 2B and S2C), suggesting that a decrease in RPAP1 expression is incompatible with development. Impaired cardiac center formation by RPAP1-depleted ESCs may reflect their reduced capacity to differentiate and/or the accumulation of dying or dysfunctional cells. Consistent with a developmental defect, *Rpap1*(+/-) ESCs displayed weak contribution to chimeric offspring (10 from 254 micro-injected embryos; Figure S2D). Furthermore, when chimeric mice were crossed to look for germline transmission, we did not obtain mice that were *Rpap1*(+/-) or *Rpap1*(-/-) (0 out of 156 pups born; Figure S2D).

To characterize the influence of RPAP1 on early events during the pluripotency-to-differentiation transition, we performed RNA sequencing (RNA-seq) analyses in ESCs, both control and

RPAP1 depleted, after 24 hr of differentiation (LIF removal). Of 12,827 transcripts detected, 899 (7.1%) were significantly differentially expressed in RPAP1-depleted cells (Figure S2E; Table S1). Global investigation via gene set enrichment analysis (GSEA) and supervised network analyses indicated that, following RPAP1 depletion, differentiating ESCs maintained proliferation pathways (Myc and E2F-regulated gene sets were significantly higher) and had an attenuated induction of mesenchymal identity (epithelial-mesenchymal transition [EMT]-related gene sets were lower) compared to the controls, including key mesenchymal genes, such as *Ctgf*, *Mest*, and *Col4a2* (Figures S2F–S2I; Tables S1 and S2). This is consistent with the delayed loss of pluripotency markers and morphological changes observed upon differentiation of RPAP1-depleted ESCs (Figures 2A, 2B, and S2C). Thus, RPAP1 depletion delayed ESC differentiation, suggesting that high levels of RPAP1 endow ESCs with the ability to rapidly differentiate, whereas reduced levels of RPAP1 dramatically slow differentiation.

### RPAP1 Depletion Induces Loss of Differentiated Cell Identity

Because RPAP1 depletion impaired ESC differentiation, we investigated the role of RPAP1 in differentiated cells. Following RPAP1 depletion in MEFs, cells proliferated and still appeared morphologically normal during days 1–3, prior to the defects that subsequently emerged at days 4–6 (see above Figures 1I, 1J, and S1D). Thus, RNA-seq was performed at day 3 in control or RPAP1-depleted MEFs to assess the transcriptome while avoiding death-related secondary effects. Nevertheless, transcriptomic alterations were dramatic, with >52% of the 12,249 genes detected displaying significantly altered expression (false discovery rate [FDR]  $q < 0.05$ ; Figure 2C; Table S3). Using multiple approaches to assess gene expression, including GSEA, gene ontology, and supervised network analysis, we observed that RPAP1 triggered a rapid and pronounced loss of multiple

## Figure 2. RPAP1 Is Required for the Establishment and Maintenance of Cell Identity

(A) Effect of RPAP1 depletion on embryoid body (EB) cardiac center development. EBs were scored daily by microscopy for the appearance of clusters of actively beating cells indicative of cardiac muscle development. The graph shows the kinetics over several days. Representative pictures of EBs are shown.

(B) qPCR analyses of pluripotency or cardiac development markers at the indicated time points from the EB differentiation assay in (A). Mean  $\pm$  SD;  $n = 3$  replicates; \* $p < 0.05$ .

(C) Overview of RNA-seq transcriptome analyses summarizing differential gene expression (FDR  $q < 0.05$ ) in MEFs at day 3 after RPAP1 depletion. (Upper panel) Proportional representation pie chart of significantly differentially expressed genes is shown. (Lower panel) Dot plot of FPKM values for all genes shows that many genes of high and low expression level remain unchanged.

(D) Ingenuity pathway analysis showing the top 25 most significantly enriched GO terms among those genes that were significantly downregulated at day 3 after RPAP1 depletion in MEFs (FDR  $q < 0.01$ ). Terms highlighted in red contain “development” or “morphogenesis.” Dotted line indicates the basal threshold of significance.

(E) Examples of the most significantly up- or downregulated gene sets identified by GSEA analysis in RNA-seq data at day 3 after RPAP1 depletion in MEFs (FDR  $q < 0.01$ ). See also Figures S3J and S3K and Table S2.

(F) qPCR validation of RNA-seq data. Mesenchymal, fibroblast, and epithelial marker mRNA expression levels were assessed by RNA-seq (left) or qPCR (right) at day 3 after RPAP1 knockdown in MEFs. Data indicate fold change relative to control shSCR. Mean  $\pm$  SD;  $n = 3$  independent MEF lines; \* $p < 0.05$ .

(G) qPCR measurement of mesenchymal and fibroblast marker mRNA levels during days 1–3 lentiviral transduction of MEFs with non-targeting control (shSCR) or with RPAP1 targeting (shRPAP1) shRNAs. Data indicate fold change relative to control. Mean  $\pm$  SD;  $n = 3$  independent MEF lines; \* $p < 0.05$ . See also Figure S2L.

(H) Heatmap summarizing the most significantly up- or downregulated hallmark gene sets identified by GSEA analysis among all gene expression at day 3 after RPAP1 depletion in MEFs (FDR  $q < 0.01$ ; left column; see Tables S2 and S3) or in ESCs 24 hr after triggering differentiation (FDR  $q < 0.05$ ; right column; see Tables S1 and S2). Hallmark gene sets with FDR  $q < 0.25$  are significant. Also highlighted in the heatmap are borderline gene sets (where FDR  $q = 0.35$ – $0.25$ ).

(I) Wound assay scratch test recovery. Graph shows the percent damaged area remaining at +24 hr. Mean  $\pm$  SD;  $n = 3$  independent MEF lines with 12 replicates each; \* $p < 0.05$ .

See also Figure S2 and Tables S1, S2, and S3.

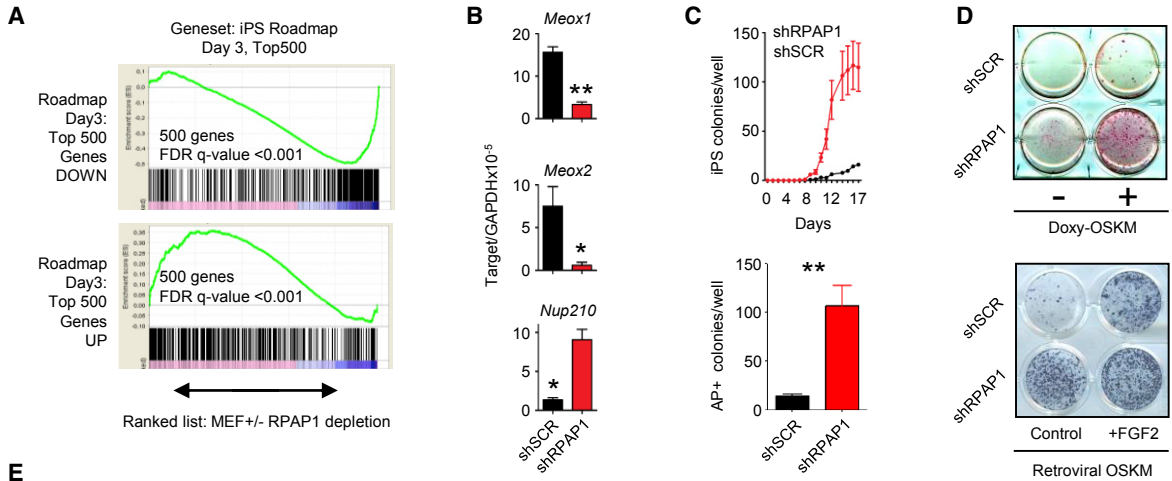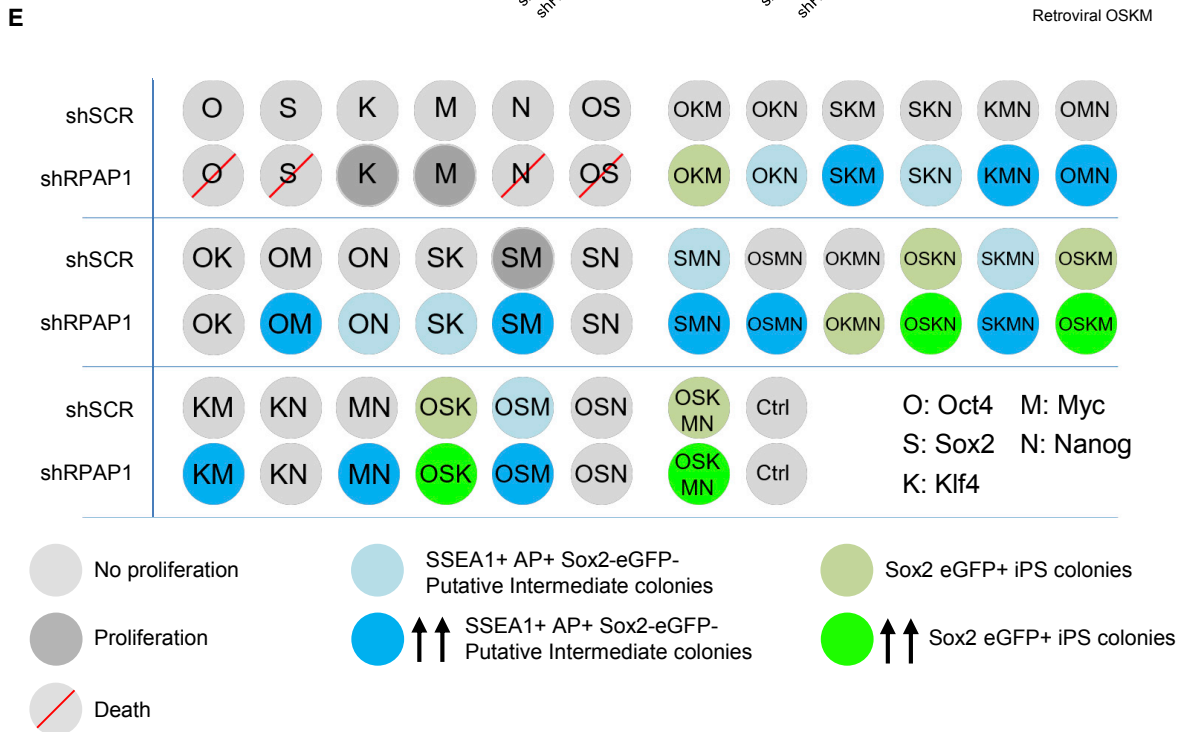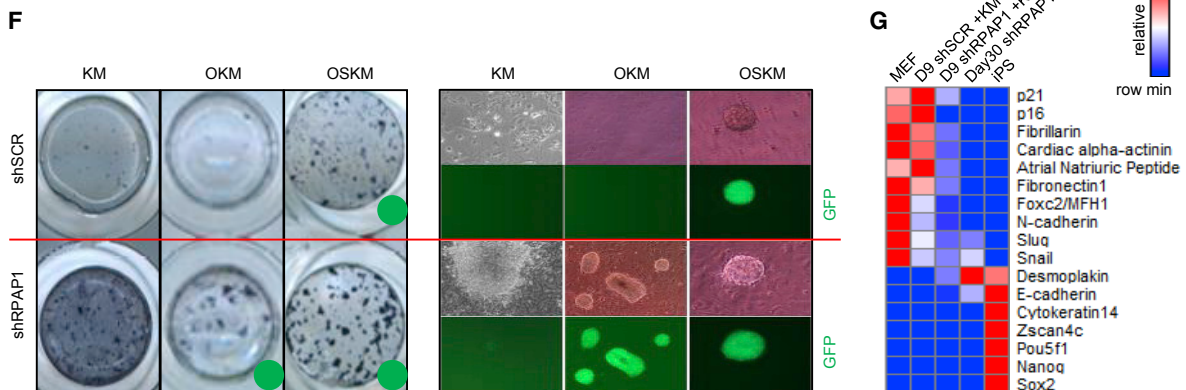

(legend on next page)

developmental processes and robust erasure of fibroblast identity within 3 days (Figures 2F–2H, S2J, and S2K; Tables S2 and S3), a sequence that was initiated after 24 hr, as confirmed by qRT-PCR for multiple mesenchymal/fibroblastic identity markers (Figures 2G and S2L). Notably, there was a remarkable parallel between the gene sets that were downregulated in MEFs by RPAP1 loss and the gene sets that failed to be upregulated in differentiating RPAP1-depleted ESCs (Figure 2H). Moreover, there was significant overlap in the mRNAs differentially expressed due to RPAP1 depletion in the two contexts (hypergeometric overlap  $p < 10^{-6}$ ). Lastly, a defining feature of mesenchymal cell identity is a high capacity for cell migration. Consistent with the above gene expression profile, RPAP1 depletion followed by a wound healing scratch assay revealed an attenuation of MEF migration capacity (Figure 2I). In summary, after RPAP1 depletion, MEFs display rapid de-differentiation via loss of mesenchymal-fibroblastic identity.

### RPAP1 Depletion Favors Reprogramming

Because RPAP1 is important for maintaining the mesenchymal cell identity of MEFs, we hypothesized that RPAP1 depletion may recapitulate an early stage of reprogramming to iPSC. Previous investigators have found that, during reprogramming, there is an initial de-differentiation wave followed by a transient intermediate state, which is resolved by a second wave of transcriptional changes, leading to pluripotency (Polo et al., 2012). Interestingly, the gene expression profile induced by RPAP1 depletion was significantly similar to the intermediate state of reprogramming (Figures 3A, S3A, and S3B). This was supported by validation with markers of the intermediate state (Polo et al., 2012), including downregulation of *Meox1* and *Meox2* and upregulation of *Nup210* (Figure 3B). This suggested that RPAP1 knockdown phenocopies the de-differentiation and loss of mesenchymal identity observed in the first wave of transcrip-

tional changes during iPSC reprogramming. Consistent with this, prior knockdown of RPAP1 for 2 days in MEFs led to significantly enhanced iPSC reprogramming with the four Yamanaka factors (*Oct4*, *Sox2*, *Klf4*, and *Myc*, abbreviated as OSKM; Figures 3C and 3D). Importantly, therefore, the lethality of RPAP1 depletion in MEFs was rescued by reprogramming to pluripotent iPSCs, suggesting that RPAP1-depleted MEFs at days 2 or 3 may represent de-differentiated cells without a defined identity, which subsequently collapse unless rescued by reprogramming into pluripotency.

To explore the minimal complement of the Yamanaka factors sufficient to rescue lethality of RPAP1 depletion and/or confer pluripotency, we tested all possible combinations of *Oct4*, *Sox2*, *Klf4*, *Myc*, and *Nanog* (OSKMN) (32 combinations; Figure 3E), in combination with a panel of media supplements reported to enhance reprogramming (15 media cocktails; Figure S3C). Four interesting features emerged: (1) RPAP1 knockdown plus several of the transcription factor combinations, including *Klf4* or *Myc*, were sufficient to rescue cell survival; in particular, shRPAP1 with *Klf4/Myc* together converted the majority of MEFs to putative intermediates of reprogramming, that is, rapidly proliferating colony-forming cells that were also positive for markers of the early stages of the reprogramming process, including alkaline phosphatase and SSEA1 cell surface expression, but were Sox2-eGFP negative (Figures 3E–3G and S3D); (2) RPAP1 depletion increased the efficiency of all successful reprogramming combinations (Figure 3E); (3) RPAP1 depletion can replace *Sox2* in combination with OKM or OKMN (Figures 3E–3G); and (4) pharmacological inhibition of transforming growth factor  $\beta$  (TGF $\beta$ ) signaling, which is known to replace *Sox2* (Li et al., 2010), cooperated with RPAP1 depletion in the OKM or OKMN reprogramming (Figure S3E). Taken together, phenotypic and expression data suggest that RPAP1 depletion induces a de-differentiated state that can be stabilized

### Figure 3. *Rpap1* Knockdown Favors De-differentiation and Reprogramming

(A) Comparison of gene expression at day 3 after RPAP1 depletion in MEFs versus a published iPSC roadmap gene expression profile (Polo et al., 2012). Panels show GSEA comparison of the published top 500 genes up- or downregulated at day 3 of the iPSC roadmap versus a ranked list of the gene expression profile in the current study at day 3 after RPAP1 depletion in MEFs (x axis). See Supplemental Experimental Procedures for assessment of the iPSC roadmap data from parental MEFs versus Thy1-negative cells at day 3 of iPSC reprogramming. FDR  $q < 0.25$  is significant. See also Figures S3A and S3B.

(B) qPCR measurement of selected genes at day 3 after RPAP1 depletion in MEFs. Downregulation of *Meox1* and *Meox2* and upregulation of *Nup210* were reported to correlate with cell gene expression during the intermediate stages of iPSC reprogramming (Hansson et al., 2012; Polo et al., 2012). Mean  $\pm$  SD;  $n = 3$  independent MEF lines; \* $p < 0.05$ ; \*\* $p < 0.01$ .

(C and D) MEF to iPSC reprogramming after RPAP1 depletion. Expression of the OSKM reprogramming factors was initiated at day 2 after lentiviral transduction of MEFs with non-targeting control (shSCR) or with RPAP1 targeting (shRPAP1) shRNAs. In (C), top panel, kinetics of iPSC colony appearance during doxycycline-induced reprogramming of i4F MEFs that express the four Yamanaka factors is shown (see Experimental Procedures). A profile representative of three independent i4F MEF lines is shown (mean  $\pm$  SD; 3 technical replicates). In (C), bottom panel, quantification of iPSC colony yield at day 14 of doxycycline-induced 4F reprogramming is shown. Mean  $\pm$  SD;  $n = 3$  independent MEF lines; \*\* $p < 0.01$ . In (D), examples of alkaline phosphatase staining to indicate iPSC colonies formed at day 12 of i4F-MEF doxycycline-induced-OSKM iPSC reprogramming (top panel) or retroviral delivery of the OSKM factors (bottom panel) are shown. FGF2 was added to stimulate reprogramming efficiency.

(E) Summary of outcomes from 32 combinations of OSKMN Yamanaka transcription factors. Sox2-eGFP MEFs at day 2 after control or RPAP1 depletion received the indicated factors by retroviral delivery, followed by culture in standard iPSC reprogramming media. Progress of iPSC reprogramming was assessed by cell proliferation rate, morphology changes, colony formation, staining for alkaline phosphatase, SSEA1 expression, and Sox2-eGFP levels. Sox2-eGFP-positive cells forming typical iPSC colonies were scored as successfully reprogrammed iPSCs. Rapidly proliferating cells that initiated colony formation and that were positive for alkaline phosphatase and SSEA1 but negative for Sox2-eGFP were scored as putative intermediate stages of reprogramming.

(F) Examples of alkaline phosphatase staining to indicate formation rates of iPSC colonies and putative intermediate cell types at day 14 of MEF reprogramming with the indicated combinations of Yamanaka factors  $\pm$  RPAP1 depletion. Green dot indicates those combinations that produced Sox2-eGFP-positive full reprogrammed iPSC colonies.

(G) qPCR measurement of mesenchymal, epithelial, and pluripotency marker mRNA expression levels. Data were converted to heatmap format to highlight the intermediate nature of marker expression displayed by the cells that were generated by shRPAP1+*Klf4/Myc*.

See also Figure S3.



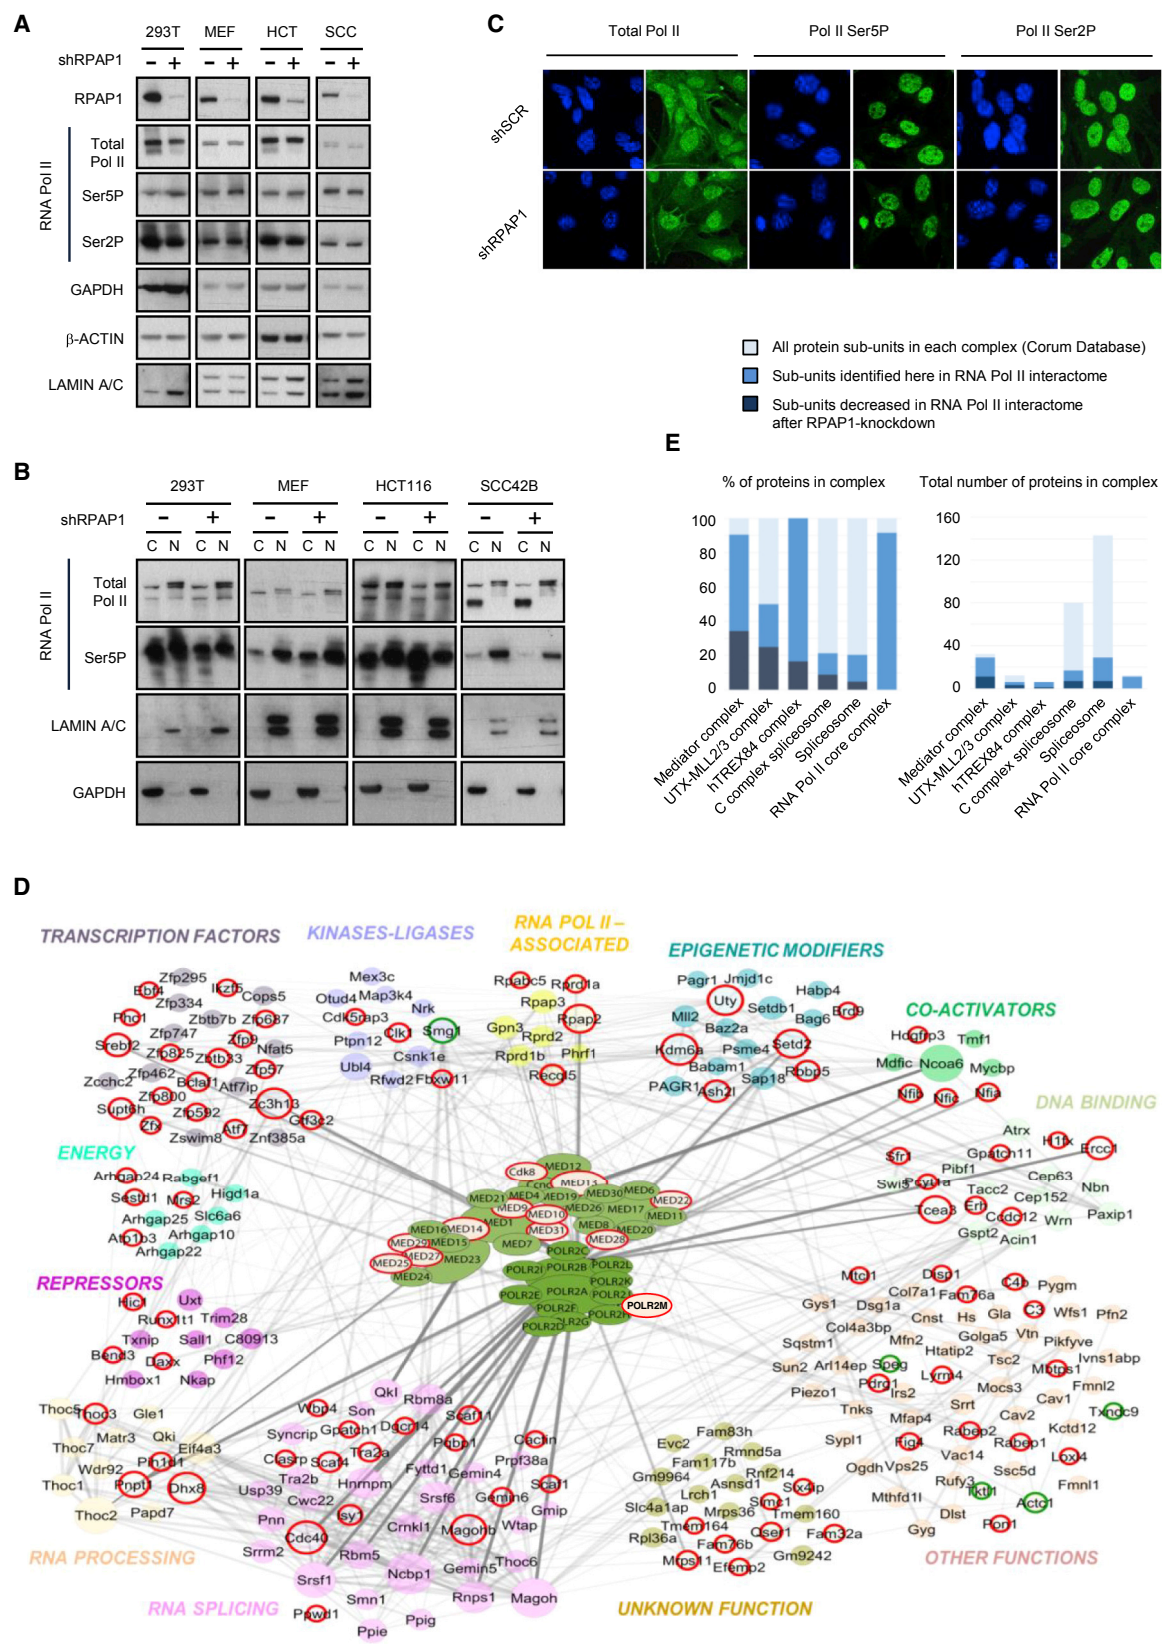

(legend on next page)

by *Klf4/Myc* and can be converted into full pluripotency if *Oct4* is included.

### RPAP1 Regulates the RNA Pol II Interactome

To understand the mechanism by which RPAP1 is required for somatic cell proliferation, we first wondered whether RPAP1 could affect the stability and localization of RNA Pol II. The RNA Pol II complex is formed by 12 subunits (RPB1–12), where RPB1 (official name POLR2A) is the largest and catalytic subunit, and 4 additional associated proteins (RPAP1–4; Wild and Cramer, 2012). The full complex is assembled in the cytoplasm, and remarkably, individual depletion of the subunits RPB2–12 or RPAP2–4 prevents nuclear import of the catalytic subunit RPB1 (Boulon et al., 2010; Forget et al., 2010, 2013; Wild and Cramer, 2012), whereas the effect of RPAP1 depletion has not been reported. Therefore, we assessed the effect of RPAP1 knockdown on RNA Pol II expression and localization in five different cell lines. RPAP1 depletion did not affect RNA Pol II expression levels (using as surrogate the catalytic subunit RPB1), or the phosphorylation levels on serine 5 (Ser5P) or serine 2 (Ser2P) of RPB1 (Figures 4A, S4A, and S4B). In contrast to all the other subunits of the RNA Pol II complex, depletion of RPAP1 did not affect RNA Pol II (RPB1) nuclear localization (Figures 4B and S4C). This was confirmed by immunofluorescence (Figures 4C and S4D). These observations rule out RNA Pol II destabilization and/or mislocalization as an explanation for the essential role of RPAP1 in the survival of differentiated cells.

We further investigated the mechanism by which RPAP1 might regulate RNA Pol II. Because RPAP1 is a large protein directly associated with RNA Pol II (see Introduction), we compared the RNA Pol II protein interactome of control versus *Rpap1* knockdown MEFs. Immunoprecipitation of the largest and core RNA Pol II subunit (RPB1), followed by mass spectrometry revealed 294 specific interactor proteins (Figure 4D; see Experimental Procedures), with a clear enrichment for transcription-related factors, including, for example, all 12 subunits of the RNA Pol II complex and almost all (28 out of 30) of Mediator subunits, illustrating the depth and specificity of this interactome analysis (Table S4). Importantly, *Rpap1* knockdown did not affect the integrity of the RNA Pol II complex itself but it resulted in a significant reduction of 104 RNA Pol II interactors (red circles

in Figure 4D; see also Table S4), whereas 5 new interactors were found (green circles). Among the RNA Pol II interactors significantly affected by RPAP1 depletion, the Mediator complex was ranked the highest in terms of proportion of affected subunits (Figure 4E; Table S4), suggesting an important alteration in the functions controlled by this complex. Furthermore, we observed that depletion of RPAP1 led to the loss of Gdown1 (official name POLR2M) from RNA Pol II complexes. Gdown1 is a recently discovered protein that tightly binds approximately half of RNA Pol II in cells, forming the so-called RNA Pol II(G) complex (Hu et al., 2006; Jishage et al., 2012). Importantly, RNA Pol II(G) complexes are known to contain RPAP1 (Jishage et al., 2012). Finally, it is relevant to note that Gdown1 is recruited by Mediator and associates with RNA Pol II on Mediator-regulated target genes (Cheng et al., 2012; Hu et al., 2006; Jishage et al., 2012; Li and Price, 2012). Altogether, we conclude that RPAP1 is a critical ingredient for Mediator-competent RNA Pol II.

### RPAP1 Is Required for Transcription of Identity and Developmental Genes

Because Mediator has a critical role recruiting RNA Pol II to genes controlling cell identity and development (Allen and Taatjes, 2015; D'Alessio et al., 2009; Hnisz et al., 2013; Whyte et al., 2013), we next investigated the global effect of RPAP1 depletion on RNA Pol II binding to chromatin. For this, we performed chromatin immunoprecipitation sequencing (ChIP-seq) for total RNA Pol II and for Ser5P RNA Pol II, the latter reflecting active RNA Pol II (Egloff et al., 2012b; Hsin and Manley, 2012). Knockdown of RPAP1 in MEFs reduced the abundance of both total and Ser5P RNA Pol II at about 50% of detected genes, whereas very few genes (<0.5%) displayed an increase (Figures 5A–5D; Table S5). Interestingly, GSEA and leading edge analyses revealed that mesenchymal regulators and related developmental processes were among the gene sets (GSEA) and genes (leading edge) with the most significant loss of RNA Pol II (Figures 5E, 5F, and S5A; Table S2).

RNA Pol II regulation at individual genes is often more complex than overall abundance, particularly in relation to two critical steps, namely RNA Pol II loading at promoters and transitioning into productive elongation (Chen et al., 2015; Liu et al., 2015;

#### Figure 4. RPAP1 Regulates the RNA Pol II Interactome

- (A) Western blots of RNA Pol II total (RPB1), Ser5P, or Ser2P expression in whole-cell lysates from a range of cell lines at day 3 after RPAP1 depletion. GAPDH,  $\beta$ -ACTIN, and LAMIN A/C were used as internal controls.
- (B) Western blots of RNA Pol II total (RPB1), Ser5P, or Ser2P expression in nuclear/cytoplasmic fractions from a range of cell lines at day 3 after RPAP1 depletion. GAPDH and LAMIN A/C were used as indicators of fraction separation. C, cytoplasmic fraction; N, nuclear fraction.
- (C) Immunofluorescence of RNA Pol II total (RPB1), Ser5P, or Ser2P in MEFs at day 3 after lentiviral transduction with non-targeting control (shSCR) or with RPAP1 targeting (shRPAP1) shRNAs. Nuclei were stained with DAPI.
- (D) Schematic of the 294 specific interactors of POLR2A/RPB1 detected in primary MEFs in this study by RNA Pol II immunoprecipitation and mass spectrometry analysis (see also Table S4). Interactors were displayed as a network using Cytoscape and grouped manually by their known physical interactions and general primary function, wherein the thickness and intensity of the connecting edges indicate the strength of their known interactions in the STRING database. Following RPAP1 depletion, the RNA Pol II interactors reduced (circled in red) and RNA Pol II interactors gained (circled in green) are indicated. The Mediator complex is depicted centrally and in full color based on the data in Figure 4E, below.
- (E) RNA Pol II interactors that were decreased following RPAP1 depletion were assigned to all 3,000 known protein complexes in the Corum database (see Supplemental Experimental Procedures). On left, complexes are ranked according to the highest percentage of proteins whose interactions were decreased upon RPAP1 depletion from the cells. On right, the total number of subunits per complex is indicated, together with the number of subunits detected in this study and the number of subunits decreased following RPAP1 depletion.
- See also Figure S4 and Table S4.

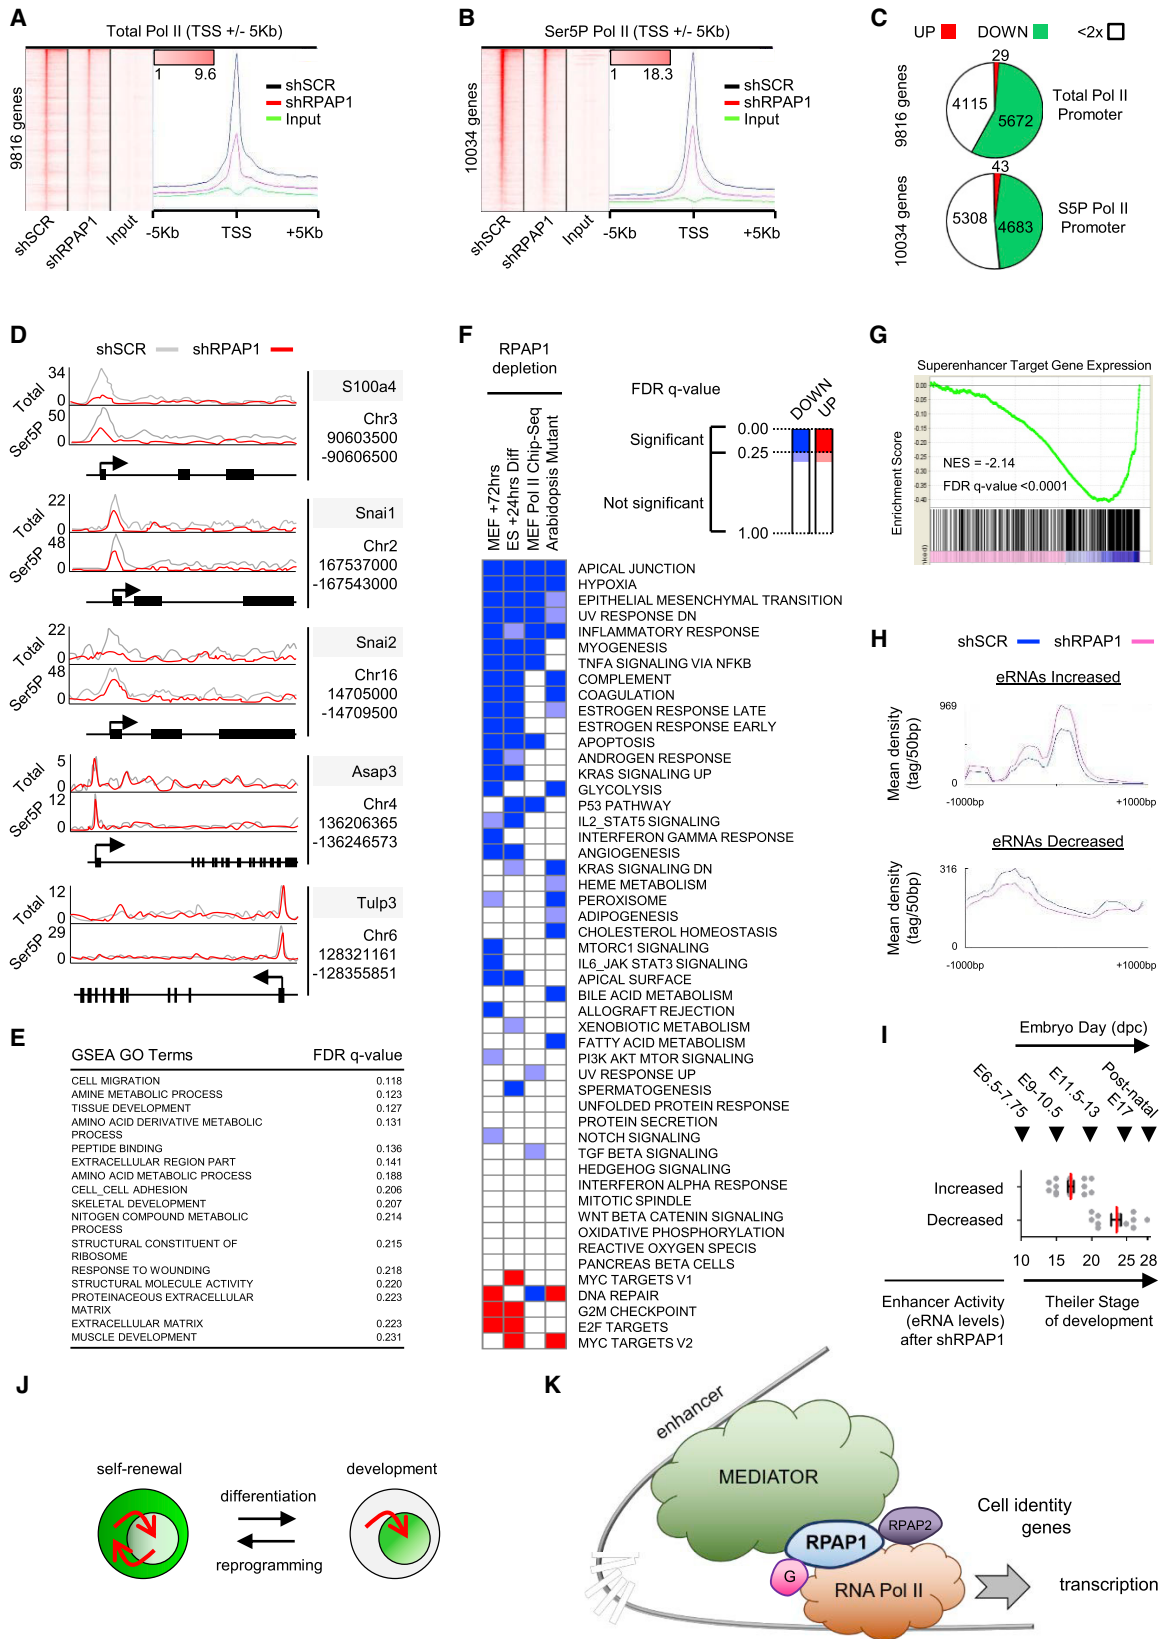

(legend on next page)



Rahl et al., 2010). Hence, we compared RNA Pol II abundance at promoter versus gene body by calculating the promoter-to-body ratio (also referred to as the “pausing index”) as described (Chen et al., 2015; Rahl et al., 2010; Figure S5B). Overall, in those genes with reliable RNA Pol II signal, we observed that 84% of the genes in MEFs had a promoter/body ratio >2.0 (Figures S5C and S5D; Table S5), which is similar to published data in mouse ESCs (91%; Rahl et al., 2010) or human cancer cells (90%; Chen et al., 2015). Following RPAP1 depletion, the promoter/body ratio was altered in many genes; in some cases, it was increased and in others it was decreased (Figure S5E). Interestingly, whereas no significant gene sets were enriched among those genes with decreased promoter/body ratios, gene sets corresponding to regulators of cell identity and development were significantly present among the genes with increased ratios (Figure S5E; Table S5).

To investigate whether RPAP1 depletion altered RNA Pol II activity and abundance through altered Ser5P levels, we calculated the Ser5P/total RNA Pol II ratio (also known as “Ser5P density”) for all genes at the promoters and gene bodies. We detected widespread changes in Ser5P density (Figure S5F), a phenomenon that has been observed before when RNA Pol II elongation is blocked (Allepuz-Fuster et al., 2014). Notably, these changes were more pronounced at promoter regions than at gene bodies (Figure S5F). Moreover, GSEA analyses revealed that, upon RPAP1 depletion, the only significantly enriched gene sets

were associated with increased Ser5P density at promoters, and these included gene sets and gene ontology (GO) terms, such as TNF $\alpha$  signaling via NF $\kappa$ B, cell migration, locomotory behavior, and genes in which RNA levels are also downregulated (Tables S2 and S5), such as *Snai2*, *Tgfb1i1*, *Tgfb3*, *Tgfb3p*, *Lox*, *Loxl1*, *Tlr2*, *Tlr3*, *Vegfa*, *Myo6*, *Smad6*, *Ccl7*, *S100a4* (fibroblast-specific protein1), and *S100a6* (Figure S5F; Table S5). Taken together, this suggests that RPAP1 depletion affects RNA Pol II transcription, including the levels of Ser5P, and this preferentially perturbs the expression of cell identity and developmental regulators.

In summary, upon *Rpap1* knockdown in MEFs, the genes and gene sets linked to the regulation of fibroblastic/mesenchymal identity or closely related developmental processes were the most significantly enriched in four key categories: (1) genes with the most significantly downregulated mRNA expression; (2) genes with the greatest overall depletion of RNA Pol II; (3) genes with selective RNA Pol II depletion from their gene body; and (4) genes with the most enhanced Ser5P density at their promoters.

### Conservation of RPAP1 Function from Plants to Mammals

Previously, it was shown that mutations of the RPAP1 homolog in plants inhibited cell differentiation, and microarray analyses showed a specific defect on developmental gene expression

#### Figure 5. RPAP1 Is Required for RNA Pol II Transcription in MEFs, Particularly on Developmental and Mesenchymal Genes

(A and B) ChIP-seq enrichment data after lentiviral transduction of MEFs with non-targeting control (shSCR) or with RPAP1 targeting (shRPAP1) shRNAs. Data are plotted as heatmaps of RNA Pol II total (A) or RNA Pol II Ser5P (B) occupancy around the transcriptional start site (TSS) region  $\pm$  5 Kb. Rows are sorted by decreasing RNA Pol II occupancy at the promoter (–100 to +300 bp) in the shSCR control. Color-scaled intensities are in units of reads per million mapped reads (rpm) (see Supplemental Experimental Procedures—ChIP-seq analysis).

(C) Proportional representation of ChIP data, classifying genes according to the changes in abundance of RNA Pol II total (upper panel) or Ser5P (lower panel) at the promoter (–100 to +300 bp) following RPAP1 depletion in MEFs for 3 days.

(D) Schematics of RNA Pol II total and Ser5P abundance on selected genes, showing examples of RNA Pol II depletion (*S100a4*, *Snai1*, and *Snai2*) or minimal effects (*Asap3* and *Tulp3*).

(E) Table summarizing the most significantly up- or downregulated GO term gene sets identified by GSEA among the genes with >2 $\times$ -fold decrease in RNA Pol II following RPAP1 depletion in MEFs (see also Tables S2 and S5). Gene sets with FDR q value < 0.25 were considered significant.

(F) Summary heatmap displaying the overlay of significant GSEA hallmark gene sets across 4 experiments (columns 1 and 2; see also Figure 2H). Column 1: GSEA on the ranked list of differential mRNA expression in MEFs at day 3  $\pm$  RPAP1 depletion is shown. Column 2: GSEA on the ranked list of differential mRNA expression in ESCs at +24 hr after inducing differentiation  $\pm$  RPAP1 depletion is shown. Column 3: GSEA on the ranked list of differential RNA Pol II abundance at all promoters in MEFs at day 3  $\pm$  RPAP1 depletion is shown. Column 4: GSEA on the ranked list of differential gene expression in *Arabidopsis thaliana* plant tissues  $\pm$  RPAP1 mutation is shown (Sanmartín et al., 2011), following conversion to the nearest mouse homolog based on protein sequence conservation (see Supplemental Experimental Procedures, conversion of plant to mouse homologs, and Table S2).

(G) GSEA to assess mRNA expression levels of MEF super-enhancer target genes (n = 661; defined by GREAT analysis as described; see Supplemental Experimental Procedures) within the transcriptome of primary MEFs at day 3 after *Rpap1* knockdown. Compare with housekeeper gene expression in Figure S5G.

(H) Plots show the average eRNA levels within two groups of MEF super-enhancers regions: those which were increased (n = 63 enhancers; top panel) or decreased (n = 64 enhancers; bottom panel) in MEFs at day 3 after RPAP1 knockdown.

(I) GREAT analysis was used to identify target genes for each of the two super-enhancer groups identified in (H) (see Supplemental Experimental Procedures). These two sets of target genes (with increased eRNAs or with decreased eRNAs, respectively) were compared with gene groups associated to particular developmental Theiler stages (these gene groups are detailed in Figures S5H and S5I). The Theiler stage of those gene groups with high similarity to our target genes of interest is represented (gray dots) together with the average (red) and SEM (black).

(J and K) Model for RPAP1 function in the mechanism for triggering development.

(J) In self-renewing ESCs, RPAP1 (in green) is abundantly expressed and predominantly cytoplasmic. Upon differentiation, nuclear accumulation of RPAP1 permits increased transcriptional regulation and activation of developmental programs. Depletion of RPAP1 in differentiated cells results in loss of cell identity and enhanced susceptibility for reprogramming toward pluripotency.

(K) Taken together, our data suggest a model where RPAP1 exists in a complex with RNA Pol II and plays an essential role in the Mediator-RNA Pol II regulatory axis. Thus, loss of RPAP1 triggers a decrease in the association between Mediator and RNA Pol II (including the key regulators Gdown1 [G] and the Ser5P phosphatase RPAP2), preferentially affecting the ability of enhancers to activate Mediator target genes, which are known to include key markers and regulators of cell identity. In somatic cells, such as MEFs, this leads to de-differentiation, as expression of fibroblastic, mesenchymal, and developmental markers is erased. See also Figure S5 and Table S5.



(Sanmartín et al., 2011). In order to directly compare the mouse and plant functional overlap, we converted the published plant differential gene expression data to the nearest mammalian protein homolog where possible (see [Experimental Procedures](#) and [Table S2](#)). Interestingly, conversion of the plant expression data to mouse homologs also revealed significant downregulation of developmental processes ([Figure 5F](#); [Table S2](#)). This suggests that loss of RPAP1 function in mice and plants downregulates similar developmental processes, including lineage specifiers and regulators of cell identity, such as hypoxia, cell polarity, extra-cellular matrix, and chemokine signaling.

### RPAP1 Preferentially Regulates Mediator-Driven Gene Expression

Mediator physically links enhancers with target genes and then recruits RNA Pol II for their transcriptional activation (Allen and Taatjes, 2015). This process is especially critical to maintain transcription of genes regulated by super-enhancers, which typically encode key markers and regulators of cell identity (Allen and Taatjes, 2015; Hnisz et al., 2013; Whyte et al., 2013). Given our observations above that RPAP1 depletion triggered both a decrease in RNA Pol II interaction with the Mediator complex and selective loss of cell identity gene expression, we next assessed the transcription of super-enhancer-driven genes. We found that following RPAP1 depletion in MEFs, the mRNA levels of genes proximal to super-enhancers were significantly decreased ([Figure 5G](#)), whereas highly expressed housekeeper genes were not affected ([Figure S5G](#)). Expression levels of enhancer RNAs (eRNAs) are proportional to their enhancer activity (Andersson et al., 2014; Li et al., 2016). In our RNA-seq, we detected eRNA expression in ~20% of super-enhancers, and we divided those enhancers into two groups, those with increased or decreased eRNA levels ([Figure 5H](#)). Interestingly, after RPAP1 depletion, enhancers with decreased eRNA levels (decreased activity) had target genes associated with Theiler stages 20–25 (embryonic day 11.5 [E11.5]–17), whereas enhancers with increased eRNA levels (increased activity) had target genes associated with Theiler stages 14–20 (E8–13; [Figures 5I](#) and [S5H](#)). Because MEFs arise from E13.5 embryos, the data suggest that enhancers of this embryo stage are decreased in activity, whereas enhancers of earlier embryo stages are activated. This is consistent with the de-differentiation effects that we observed above in MEFs after RPAP1 depletion. Taken together, this suggests that RPAP1 depletion affects RNA Pol II transcription by disruption of the Mediator/RNA Pol II interaction, and this preferentially reduces the expression of super-enhancer-driven cell identity and developmental regulators ([Figures 5J](#) and [5K](#)).

## DISCUSSION

We have characterized the function of mammalian RPAP1 and observed prominent parallels with its plant homolog in terms of subcellular localization, developmental expression patterns, regulation of RNA polymerase II transcription, and a requirement to establish and maintain differentiated cell identity. Based on this, we propose that this is an ancient mechanism to trigger the transition from pluripotency to differentiation.

### RPAP1 Nucleo-cytoplasmic Shuttling

We found that RPAP1 protein is very abundant and largely cytoplasmic in pluripotent cells, which is consistent with the apparent lack of effect of RPAP1 depletion on self-renewing pluripotent cells. However, we cannot exclude the possibility that *Rpap1* knockdown has some impact on self-renewal pathways, and we note that we were unable to isolate *Rpap1* knockout (KO) ESCs, suggesting that ESCs require a small fraction of RPAP1 either for an essential function or to maintain fast proliferation under self-renewal conditions. Interestingly, we observed rapid nuclear accumulation of RPAP1 by blocking nuclear export, implying a continuous cycle of RPAP1 in/out of pluripotent cell nuclei. In contrast, the onset of differentiation coincided with RPAP1 nuclear accumulation, observed both *in vitro* and *in vivo*, and recruitment to promoters together with RNA Pol II. In fact, this developmental switch in nucleo-cytoplasmic shuttling is similar to the behavior of the RPAP1 plant homolog (Muñoz et al., 2017; Sanmartín et al., 2011, 2012). This is also consistent with the existence of multiple conserved nuclear localization signals (NLS)/nuclear export signal (NES) sequences on RPAP1 and an armadillo superfamily repeat region (ARM), a motif associated with nucleo-cytoplasmic shuttling, that is highly conserved in RPAP1 homologs of *Saccharomyces*, *Drosophila*, and mammals (Jeronimo et al., 2004). Together, this suggests a conserved model for RPAP1 in the mechanism for triggering development ([Figure 5J](#)).

### RPAP1 Is Required to Establish and Maintain Cell Identity

During development, new cell identity can arise through a series of reversible epithelial-to-mesenchymal transitions (EMTs) (Thiery et al., 2009). RPAP1 expression was required during ESC differentiation, including toward cardiac muscle development, a path containing several EMT transitions (Thiery et al., 2009). Consistent with this, we failed to obtain homozygous *Rpap1*-null mice. Moreover, RPAP1 depletion resulted in a striking loss of the mesenchymal identity of MEFs and subsequent cell death. Similarly, all tested cell lines (a total of 8) died several days after RPAP1 depletion or attempted CRISPR knockout. Taken together, these data suggest a role for RPAP1 in establishment and maintenance of cell identity and this explains why its complete elimination is incompatible with cell viability.

### RPAP1 Depletion Permits De-differentiation and Reprogramming

RPAP1 depletion in MEFs induced loss of the mesenchymal/fibroblastic identity. Strikingly, however, such de-differentiation complemented the early stages of reprogramming to pluripotent iPSCs, and thus, RPAP1 depletion enhanced the efficiency of recapturing pluripotency. Therefore, reprogramming with OSKM rescued the lethality of RPAP1 depletion, a phenomenon we found could be attributed to the overexpression of *Klf4* plus *Myc* in particular. We hypothesize that *Klf4/Myc* dual overexpression may revert or compensate the lethal effects of RPAP1 depletion because MYC amplifies active RNA Pol II transcription (Lin et al., 2012; van Riggelen et al., 2010), whereas the ectodermal lineage specifier KLF4 may help to specify a new epithelial identity. In this way, RPAP1 depletion plus *Klf4/Myc*

overexpression may stabilize a highly proliferative reprogramming intermediate.

### RPAP1 Acts at the Interface between RNA Pol II and Mediator

RPAP1 is a large (153-kDa) multidomain protein that has been reported to bind a number of interesting RNA Pol II regulators, most notably the RPB3/11 heterodimer, and this is well substantiated in plants, yeasts, and mammals (Giaever et al., 2002; Hazbun et al., 2003; Ito et al., 2001; Jeronimo et al., 2004, 2007; Sanmartín et al., 2011). Indeed, loss of RPAP1 in yeast produces global changes in gene expression that resemble those produced by loss of RPB11 (Jeronimo et al., 2004). The RPB3/RPB11 heterodimer provides the interface between RNA Pol II and the Mediator complex (Davis et al., 2002). Importantly, Mediator plays a critical role in establishing cell identity (Allen and Taatjes, 2015; Hnisz et al., 2013; Jeronimo and Robert, 2017; Whyte et al., 2013), and RPB3 is reported to specify muscle identity (Corbi et al., 2002). Here, we detected a major disruption of the RNA Pol II interactome following RPAP1 depletion, and most notably, out of 3,000 known protein complexes in the Corum database, the complex most heavily affected was the Mediator complex. Therefore, our current findings suggest a model whereby RPAP1 operates at the interface between RNA Pol II and Mediator to direct the transcription of cell identity genes.

### RPAP1 Is Required for RNA Pol II Transcription at Cell Identity Genes

Consistent with the pivotal role of RPAP1 in the Mediator/RNA Pol II axis, we observed widespread transcriptional changes in RPAP1-depleted MEFs, with significantly altered gene expression in 52% of all detectable mRNAs and decreased RNA Pol II loading in 50%–60% of all genes. However, we also observed that about 40% of genes displayed minimal changes in RNA Pol II abundance (Figure 5C), and many highly expressed mRNAs remained unaffected (Figures 2C and S5G), arguing against a non-specific defect in RNA Pol II transcription. Furthermore, upon RPAP1 knockdown in MEFs, genes regulating developmental processes and fibroblastic/mesenchymal identity were the most significantly affected according to four criteria: (1) downregulated mRNA expression; (2) greatest overall depletion of RNA Pol II; (3) increased Ser5P RNA Pol II density at promoters; and (4) depletion of RNA Pol II within gene bodies relative to promoters. These features are consistent with RPAP1 deletion affecting RNA Pol II loading on promoters and promoter escape into gene bodies. Remarkably, these aspects mirror Mediator's best known functions (Jeronimo and Robert, 2017).

Our proteomic data provide mechanistic explanations for the relative increase in Ser5P RNA Pol II at promoters and for the relative reduction of RNA Pol II from gene bodies. In particular, RPAP1 has conserved interactions with the Ser5P phosphatase RPAP2 in plants and mammals (Egloff et al., 2012a; Jeronimo et al., 2007; Mosley et al., 2009; Muñoz et al., 2017). We observed that RPAP2 phosphatase was depleted from the Pol II interactome upon knockdown of RPAP1, and this may explain the relative accumulation of Ser5P RNA Pol II at promoters. Meanwhile, Gdown1 (official name POLR2M) is a

recently discovered protein, often referred to as “the 13<sup>th</sup> subunit,” that tightly binds approximately half of the RNA Pol II complexes in cells, forming RNA Pol II(G) (Hu et al., 2006; Jishage et al., 2012). Specifically, Gdown1 is recruited by Mediator and associates with RNA Pol II on Mediator-regulated target genes (Cheng et al., 2012; Hu et al., 2006; Jishage et al., 2012; Li and Price, 2012). It has been reported that RNA Pol II(G) contains RPAP1 (Jishage et al., 2012), and here, we show that depletion of RPAP1 leads to the loss of Gdown1 from RNA Pol II complexes. Therefore, RPAP1 acts as a critical ingredient for Mediator-competent RNA Pol II.

Mediator is most abundant in super-enhancers, and super-enhancer target genes are typically the most important for defining cell identity and the most heavily dependent on Mediator to drive their transcription by RNA Pol II (Allen and Taatjes, 2015; Hnisz et al., 2013; Jeronimo and Robert, 2017; Whyte et al., 2013). In agreement, the gene expression of super-enhancer target genes was preferentially decreased following RPAP1 depletion in MEFs, and this pattern of gene expression correlates closely with the first 3 days of iPSC reprogramming, constituting a de-differentiation effect. Consistent with a de-differentiation effect, we observed that the activity of enhancers, measured by their eRNA levels, shifted from the developmental stage of MEFs toward an earlier developmental stage. This is consistent with recent evidence that, during cell identity transitions, coordinated changes in enhancer activity lead the re-organization of transcriptional networks (Arner et al., 2015; Factor et al., 2014). Taken together, the data point toward a primary role for RPAP1 in maintaining the expression of identity regulators through the Mediator/RNA Pol II axis.

### Conclusions

Collectively, our data point toward a developmental requirement for mammalian RPAP1, both in establishing and maintaining cell identity, through direct regulation of RNA polymerase II transcription. Mechanistically, we present evidence suggesting a unified model whereby RPAP1 operates by coordinating the communication between Mediator and RNA Pol II, particularly on super-enhancer-driven genes.

### EXPERIMENTAL PROCEDURES

Further details and an outline of resources used in this work can be found in [Supplemental Experimental Procedures](#).

#### Animal Experimentation

Experiments with mice at the CNIO, Madrid, were performed according to protocols approved by the CNIO-ISCIII Ethics Committee for Research and Animal Welfare (CElyBA).

#### Cell Culture, RPAP1 Knockdown, and CRISPR-Cas9 Knockout

Primary MEFs (wild-type; passage 2) were obtained at E13.5 from pure inbred C57BL/6 background mice. Immortalized primary mouse hepatocytes HEP cells have been previously described (Lopez-Guadamillas et al., 2016). Mouse P19EC cells, monkey COS7 cells, and the human cell lines 293T, HCT116, SCC42B, and H226 were from ATCC. All the above-mentioned cells were maintained in DMEM medium with 10% fetal bovine serum (FBS) (Gibco) with antibiotics (penicillin/streptomycin 100 U/mL). For ESC culture and iPSC reprogramming conditions, see the [Supplemental Experimental Procedures](#) for full details. For shRNA knockdown or overexpression methods with

retroviral and lentiviral vectors and for a detailed description of the CRISPR-Cas9 strategies used here, see the [Supplemental Experimental Procedures](#) for full details.

#### RNA Pol II Protein Interactome and Protein Expression Analysis

RNA Pol II immunoprecipitation, interactome analysis, and liquid chromatography (LC)/LC mass spectrometry was performed on day +2 after lentiviral shRNA knockdown of RPAP1 in primary MEFs. See the [Supplemental Experimental Procedures](#) for full details. For analysis of protein expression by western blot, immunofluorescence, cytometry, and histopathology, see the [Supplemental Experimental Procedures](#) for full details.

#### RNA Isolation and Gene Expression Analyses by qRT-PCR or RNA-Seq

Total RNA was extracted from cells on column by RNeasy kit with DNA digestion following provider's recommendations (QIAGEN no. 74104) and retro-transcribed into cDNA following manufacturer's protocol with Superscript Reverse Transcriptase (Life Technologies). Real-time qPCR was performed using Syber Green Power PCR Master Mix (Applied Biosystems) in an ABI PRISM 7700 thermocycler (Applied Biosystems). Primers are listed in the resource table in [Supplemental Experimental Procedures](#). For RNA-seq transcriptomic analyses, see the [Supplemental Experimental Procedures](#) for full details.

#### Chromatin Immunoprecipitation: ChIP-qPCR and ChIP-Seq

ChIP-qPCR was performed with antibodies for total RNA Pol II and RPAP1 and with primers listed in the resource tables in [Supplemental Experimental Procedures](#). ChIP-seq for RNA Pol II was performed as described (Rahl et al., 2010). See the [Supplemental Experimental Procedures](#) for full details of ChIP-seq methods, analyses, and definition of promoter and enhancer regions

#### Quantification and Statistical Analysis

Unless otherwise specified, quantitative data are presented as mean  $\pm$  SD and significance was assessed by the two-tailed Student's t test; \* $p$  < 0.05; \*\* $p$  < 0.01; \*\*\* $p$  < 0.001.

#### DATA AND SOFTWARE AVAILABILITY

The accession number for the three datasets (two RNA-seq and one ChIP-seq experiments) reported in this paper is GEO: GSE78795. The accession number for the mass spectrometry proteomics data reported in this paper is ProteomeXchange: PXD007114.

#### SUPPLEMENTAL INFORMATION

Supplemental Information includes Supplemental Experimental Procedures, five figures, and five tables and can be found with this article online at <https://doi.org/10.1016/j.celrep.2017.12.062>.

#### ACKNOWLEDGMENTS

We are grateful to Elisa Varela for assistance with morula and blastocyst fixation. Work in the laboratory of M.S. is funded by the CNIO and the IRB and by grants from the Spanish Ministry of Economy co-funded by the European Regional Development Fund (ERDF) (SAF2013-48256-R), the European Research Council (ERC-2014-AdG/669622), the Regional Government of Madrid co-funded by the European Social Fund (ReCaRe project), the European Union (RISK-IR project), the Botin Foundation and Banco Santander (Santander Universities Global Division), the Ramon Areces Foundation, and the AXA Foundation. S.R. was funded by a contract from the Ramon y Cajal Program (RYC-2011-09242) and by the Spanish Ministry of Economy co-funded by the ERDF (SAF2013-49147-P and SAF2016-80874-P).

#### AUTHOR CONTRIBUTIONS

C.J.L. performed most of the experiments, contributed to experimental design and data analysis, and co-wrote the manuscript; R.B., I.C., S.N.-P., S.R., and

N.I. contributed to experimental work; C.J.L., A.M.-V., O.G.-C., G.G.-L., and E.A.-L. contributed to bioinformatic analyses; V.E.A. and A.d.S. performed supervised network analyses; S.O. provided reagents, contributed to experimental design, and supervised embryo work; and E.R., O.F.-C., and J.M. provided reagents, discussion, and revisions. M.S. designed and supervised the study, secured funding, analyzed the data, and co-wrote the manuscript. All authors discussed the results and commented on the manuscript.

#### DECLARATION OF INTERESTS

The authors declare no competing interests.

Received: September 18, 2017

Revised: November 3, 2017

Accepted: December 18, 2017

Published: January 9, 2018

#### REFERENCES

- Allen, B.L., and Taatjes, D.J. (2015). The Mediator complex: a central integrator of transcription. *Nat. Rev. Mol. Cell Biol.* *16*, 155–166.
- Allepez-Fuster, P., Martínez-Fernández, V., Garrido-Godino, A.I., Alonso-Aguado, S., Hanes, S.D., Navarro, F., and Calvo, O. (2014). Rpb4/7 facilitates RNA polymerase II CTD dephosphorylation. *Nucleic Acids Res.* *42*, 13674–13688.
- Andersson, R., Gebhard, C., Miguel-Escalada, I., Hoof, I., Bornholdt, J., Boyd, M., Chen, Y., Zhao, X., Schmidl, C., Suzuki, T., et al. (2014). An atlas of active enhancers across human cell types and tissues. *Nature* *507*, 455–461.
- Amer, E., Daub, C.O., Vitting-Seerup, K., Andersson, R., Lilje, B., Drablos, F., Lennartsson, A., Rönerblad, M., Hrydzusko, O., Vitezic, M., et al.; FANTOM Consortium (2015). Transcribed enhancers lead waves of coordinated transcription in transitioning mammalian cells. *Science* *347*, 1010–1014.
- Boulon, S., Pradet-Balade, B., Verheggen, C., Molle, D., Boireau, S., Georgieva, M., Azzag, K., Robert, M.C., Ahmad, Y., Neel, H., et al. (2010). HSP90 and its R2TP/Prefoldin-like cochaperone are involved in the cytoplasmic assembly of RNA polymerase II. *Mol. Cell* *39*, 912–924.
- Chen, F.X., Woodfin, A.R., Gardini, A., Rickels, R.A., Marshall, S.A., Smith, E.R., Shiekhattar, R., and Shilatifard, A. (2015). PAF1, a molecular regulator of promoter-proximal pausing by RNA Polymerase II. *Cell* *162*, 1003–1015.
- Cheng, B., Li, T., Rahl, P.B., Adamson, T.E., Loudas, N.B., Guo, J., Varzavand, K., Cooper, J.J., Hu, X., Gnat, A., et al. (2012). Functional association of Gdown1 with RNA polymerase II poised on human genes. *Mol. Cell* *45*, 38–50.
- Corbi, N., Di Padova, M., De Angelis, R., Bruno, T., Libri, V., Iezzi, S., Floridi, A., Fanciulli, M., and Passananti, C. (2002). The alpha-like RNA polymerase II core subunit 3 (RPB3) is involved in tissue-specific transcription and muscle differentiation via interaction with the myogenic factor myogenin. *FASEB J.* *16*, 1639–1641.
- Creyghton, M.P., Cheng, A.W., Welstead, G.G., Kooistra, T., Carey, B.W., Steine, E.J., Hanna, J., Lodato, M.A., Frampton, G.M., Sharp, P.A., et al. (2010). Histone H3K27ac separates active from poised enhancers and predicts developmental state. *Proc. Natl. Acad. Sci. USA* *107*, 21931–21936.
- D'Alessio, J.A., Wright, K.J., and Tijan, R. (2009). Shifting players and paradigms in cell-specific transcription. *Mol. Cell* *36*, 924–931.
- Davis, J.A., Takagi, Y., Kornberg, R.D., and Asturias, F.A. (2002). Structure of the yeast RNA polymerase II holoenzyme: Mediator conformation and polymerase interaction. *Mol. Cell* *10*, 409–415.
- Egloff, S., Zaborowska, J., Laitem, C., Kiss, T., and Murphy, S. (2012a). Ser7 phosphorylation of the CTD recruits the RPAP2 Ser5 phosphatase to snRNA genes. *Mol. Cell* *45*, 111–122.
- Egloff, S., Dienstbier, M., and Murphy, S. (2012b). Updating the RNA polymerase CTD code: adding gene-specific layers. *Trends Genet.* *28*, 333–341.
- Factor, D.C., Corradin, O., Zentner, G.E., Saiakhova, A., Song, L., Chenoweth, J.G., McKay, R.D., Crawford, G.E., Scacheri, P.C., and Tesar, P.J. (2014).

- Epigenomic comparison reveals activation of “seed” enhancers during transition from naive to primed pluripotency. *Cell Stem Cell* 14, 854–863.
- Forget, D., Lacombe, A.A., Cloutier, P., Al-Khoury, R., Bouchard, A., Lavallée-Adam, M., Faubert, D., Jeronimo, C., Blanchette, M., and Coulombe, B. (2010). The protein interaction network of the human transcription machinery reveals a role for the conserved GTPase RPAP4/GPN1 and microtubule assembly in nuclear import and biogenesis of RNA polymerase II. *Mol. Cell. Proteomics* 9, 2827–2839.
- Forget, D., Lacombe, A.A., Cloutier, P., Lavallée-Adam, M., Blanchette, M., and Coulombe, B. (2013). Nuclear import of RNA polymerase II is coupled with nucleocytoplasmic shuttling of the RNA polymerase II-associated protein 2. *Nucleic Acids Res.* 41, 6881–6891.
- Gaillochet, C., and Lohmann, J.U. (2015). The never-ending story: from pluripotency to plant developmental plasticity. *Development* 142, 2237–2249.
- Giaever, G., Chu, A.M., Ni, L., Connelly, C., Riles, L., Véronneau, S., Dow, S., Lucau-Danila, A., Anderson, K., André, B., et al. (2002). Functional profiling of the *Saccharomyces cerevisiae* genome. *Nature* 418, 387–391.
- Hansson, J., Rafiee, M.R., Reiland, S., Polo, J.M., Gehring, J., Okawa, S., Huber, W., Hochedlinger, K., and Krijgsvel, J. (2012). Highly coordinated proteome dynamics during reprogramming of somatic cells to pluripotency. *Cell Rep.* 2, 1579–1592.
- Hazbun, T.R., Malmström, L., Anderson, S., Graczyk, B.J., Fox, B., Riffle, M., Sundin, B.A., Aranda, J.D., McDonald, W.H., Chiu, C.-H., et al. (2003). Assigning function to yeast proteins by integration of technologies. *Mol. Cell* 12, 1353–1365.
- Hnisz, D., Abraham, B.J., Lee, T.I., Lau, A., Saint-André, V., Sigova, A.A., Hoke, H.A., and Young, R.A. (2013). Super-enhancers in the control of cell identity and disease. *Cell* 155, 934–947.
- Hsin, J.P., and Manley, J.L. (2012). The RNA polymerase II CTD coordinates transcription and RNA processing. *Genes Dev.* 26, 2119–2137.
- Hu, X., Malik, S., Negriou, C.C., Hubbard, K., Velalar, C.N., Hampton, B., Grosu, D., Catalano, J., Roeder, R.G., and Gnatt, A. (2006). A Mediator-responsive form of metazoan RNA polymerase II. *Proc. Natl. Acad. Sci. USA* 103, 9506–9511.
- Ito, T., Chiba, T., Ozawa, R., Yoshida, M., Hattori, M., and Sakaki, Y. (2001). A comprehensive two-hybrid analysis to explore the yeast protein interactome. *Proc. Natl. Acad. Sci. USA* 98, 4569–4574.
- Jeronimo, C., and Robert, F. (2017). The Mediator complex: at the nexus of RNA Polymerase II transcription. *Trends Cell Biol.* 27, 765–783.
- Jeronimo, C., Langelier, M.-F., Zeghouf, M., Cojocar, M., Bergeron, D., Baali, D., Forget, D., Mnaimneh, S., Davierwala, A.P., Pootoolal, J., et al. (2004). RPAP1, a novel human RNA polymerase II-associated protein affinity purified with recombinant wild-type and mutated polymerase subunits. *Mol. Cell. Biol.* 24, 7043–7058.
- Jeronimo, C., Forget, D., Bouchard, A., Li, Q., Chua, G., Poitras, C., Thérien, C., Bergeron, D., Bourassa, S., Greenblatt, J., et al. (2007). Systematic analysis of the protein interaction network for the human transcription machinery reveals the identity of the 7SK capping enzyme. *Mol. Cell* 27, 262–274.
- Jishage, M., Malik, S., Wagner, U., Uberheide, B., Ishihama, Y., Hu, X., Chait, B.T., Gnatt, A., Ren, B., and Roeder, R.G. (2012). Transcriptional regulation by Pol II(G) involving mediator and competitive interactions of Gdown1 and TFIIF with Pol II. *Mol. Cell* 45, 51–63.
- Kagey, M.H., Newman, J.J., Bilodeau, S., Zhan, Y., Orlando, D.A., van Berkum, N.L., Ebmeier, C.C., Goossens, J., Rahl, P.B., Levine, S.S., et al. (2010). Mediator and cohesin connect gene expression and chromatin architecture. *Nature* 467, 430–435.
- Levine, M. (2011). Paused RNA polymerase II as a developmental checkpoint. *Cell* 145, 502–511.
- Li, T., and Price, D. (2012). Gdown1: making a link between mediator and RNA polymerase II elongation control. *Transcription* 3, 177–180.
- Li, R., Liang, J., Ni, S., Zhou, T., Qing, X., Li, H., He, W., Chen, J., Li, F., Zhuang, Q., et al. (2010). A mesenchymal-to-epithelial transition initiates and is required for the nuclear reprogramming of mouse fibroblasts. *Cell Stem Cell* 7, 51–63.
- Li, W., Notani, D., and Rosenfeld, M.G. (2016). Enhancers as non-coding RNA transcription units: recent insights and future perspectives. *Nat. Rev. Genet.* 17, 207–223.
- Lin, C.Y., Lovén, J., Rahl, P.B., Paranal, R.M., Burge, C.B., Bradner, J.E., Lee, T.I., and Young, R.A. (2012). Transcriptional amplification in tumor cells with elevated c-Myc. *Cell* 151, 56–67.
- Liu, X., Kraus, W.L., and Bai, X. (2015). Ready, pause, go: regulation of RNA polymerase II pausing and release by cellular signaling pathways. *Trends Biochem. Sci.* 40, 516–525.
- Lopez-Guadamillas, E., Fernandez-Marcos, P.J., Pantoja, C., Muñoz-Martin, M., Martínez, D., Gómez-López, G., Campos-Olivas, R., Valverde, A.M., and Serrano, M. (2016). p21Cip1 plays a critical role in the physiological adaptation to fasting through activation of PPAR $\alpha$ . *Sci. Rep.* 6, 34542.
- Meyerowitz, E.M. (2002). Plants compared to animals: the broadest comparative study of development. *Science* 295, 1482–1485.
- Mosley, A.L., Pattenden, S.G., Carey, M., Venkatesh, S., Gilmore, J.M., Florens, L., Workman, J.L., and Washburn, M.P. (2009). Rtr1 is a CTD phosphatase that regulates RNA polymerase II during the transition from serine 5 to serine 2 phosphorylation. *Mol. Cell* 34, 168–178.
- Muñoz, A., Mangano, S., González-García, M.P., Contreras, R., Sauer, M., De Rybel, B., Weijers, D., Sánchez-Serrano, J.J., Sanmartín, M., and Rojo, E. (2017). RIMA-dependent nuclear accumulation of IYO triggers auxin-irreversible cell differentiation in Arabidopsis. *Plant Cell* 29, 575–588.
- Polo, J.M., Anderssen, E., Walsh, R.M., Schwarz, B.A., Nefzger, C.M., Lim, S.M., Borkent, M., Apostolou, E., Alaei, S., Cloutier, J., et al. (2012). A molecular roadmap of reprogramming somatic cells into iPS cells. *Cell* 151, 1617–1632.
- Rahl, P.B., Lin, C.Y., Seila, A.C., Flynn, R.A., McCuine, S., Burge, C.B., Sharp, P.A., and Young, R.A. (2010). c-Myc regulates transcriptional pause release. *Cell* 141, 432–445.
- Sanmartín, M., Sauer, M., Muñoz, A., Zouhar, J., Ordóñez, A., van de Ven, W.T.G., Caro, E., de la Paz Sánchez, M., Raikhel, N.V., Gutiérrez, C., et al. (2011). A molecular switch for initiating cell differentiation in Arabidopsis. *Curr. Biol.* 21, 999–1008.
- Sanmartín, M., Sauer, M., Muñoz, A., and Rojo, E. (2012). MINIYO and transcriptional obligation: lifting the roadblock to differentiation. *Transcription* 3, 25–28.
- Savatier, P., Lapillonne, H., van Grunsven, L.A., Rudkin, B.B., and Samarut, J. (1996). Withdrawal of differentiation inhibitory activity/leukemia inhibitory factor up-regulates D-type cyclins and cyclin-dependent kinase inhibitors in mouse embryonic stem cells. *Oncogene* 12, 309–322.
- Thiery, J.P., Acloque, H., Huang, R.Y.J., and Nieto, M.A. (2009). Epithelial-mesenchymal transitions in development and disease. *Cell* 139, 871–890.
- van Riggelen, J., Yetil, A., and Felsner, D.W. (2010). MYC as a regulator of ribosome biogenesis and protein synthesis. *Nat. Rev. Cancer* 10, 301–309.
- Whyte, W.A., Orlando, D.A., Hnisz, D., Abraham, B.J., Lin, C.Y., Kagey, M.H., Rahl, P.B., Lee, T.I., and Young, R.A. (2013). Master transcription factors and mediator establish super-enhancers at key cell identity genes. *Cell* 153, 307–319.
- Wild, T., and Cramer, P. (2012). Biogenesis of multisubunit RNA polymerases. *Trends Biochem. Sci.* 37, 99–105.



**Cell Reports, Volume 22**

**Supplemental Information**

**The RNA Polymerase II Factor RPAP1 Is Critical  
for Mediator-Driven Transcription  
and Cell Identity**

**Cian J. Lynch, Raquel Bernad, Isabel Calvo, Sandrina Nóbrega-Pereira, Sergio Ruiz, Nuria Ibarz, Ana Martínez-Val, Osvaldo Graña-Castro, Gonzalo Gómez-López, Eduardo Andrés-León, Vladimir Espinosa Angarica, Antonio del Sol, Sagrario Ortega, Oscar Fernández-Capetillo, Enrique Rojo, Javier Muñoz, and Manuel Serrano**

## **Supplemental Information**

- Supplemental Figures and Legends S1-S5
- Supplemental Experimental Procedures
- Supplemental References

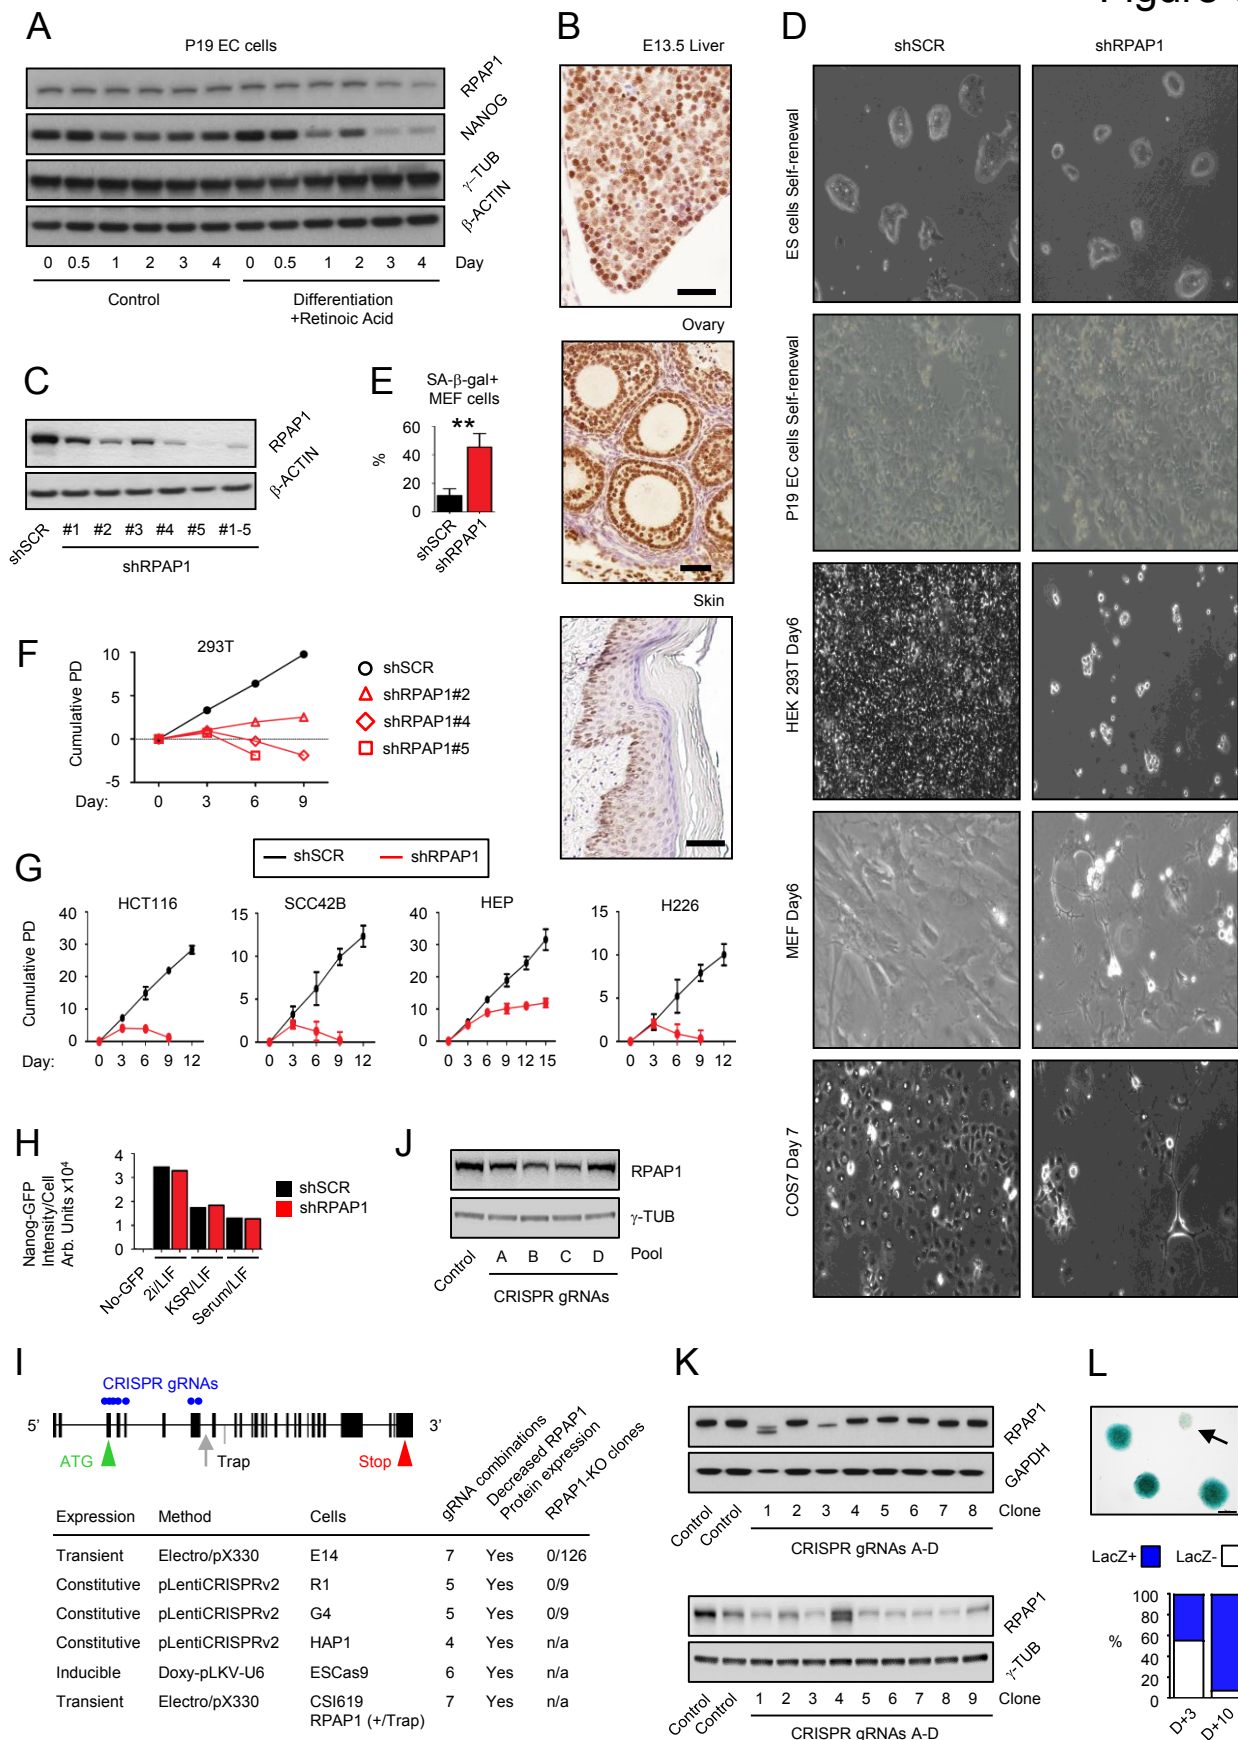

**Figure S1. RPAP1 expression, localisation, and requirement for survival in stem cells versus differentiated cells, Related to Figure 1.**

- (A) Western blot of RPAP1 expression during a timecourse of P19EC cell differentiation by Retinoic Acid addition.
- (B) Immunohistochemical staining for RPAP1 in mouse E13.5 liver, adult ovary, and adult skin. Scale bars represent 30  $\mu$ m.
- (C) Western blot of RPAP1 expression in mouse ES cells at day 6 following five separate lentiviral shRNA against RPAP1 (#1-#5).
- (D) Photographs of the indicated cell lines at days 6-9 after lentiviral control (shSCR) or RPAP1 depletion (shRPAP1).
- (E) Quantification of senescence-associated  $\beta$ -galactosidase staining in MEFs at day 9 after lentiviral control (shSCR) or RPAP1 depletion (shRPAP1). Mean $\pm$ SD, n=3 replicates; \*\*p<0.01.
- (F,G) Proliferation curves (shown by cumulative population doubling) following lentiviral control (shSCR) or RPAP1 depletion (shRPAP1) in 293T cells using 3 different shRNAs (F), or in the indicated cell lines (G).
- (H) FACS analysis of a Nanog-GFP reporter ES cell line (TNGA) cultured in three different media cocktails, at day 6 after lentiviral control (shSCR) or RPAP1 depletion (shRPAP1). Wild type non-GFP ES cells were used as negative control.
- (I) Schematic of the 26-Exon mouse RPAP1 gene (Gene ID: 68925; NM\_177294.5). Indicated are: the open reading frame ATG start (green, exon3) and TGA stop (red, exon26); the location of the gene trap in CSI619 ES cells (grey, intron8); and the location of CRISPR guide RNAs used in this study (blue, exons 3-7; see also: **Resource Tables in Supplemental Experimental Procedures**). Table (below) summarizes the effect of multiple CRISPR approaches on the expression of RPAP1. While RPAP1 protein levels were decreased in cell pools and in clonal lines, no RPAP1-null clones could be derived.
- (J) Example of Western blot analyses of whole population from haploid HAP1 cells following CRISPR against RPAP1 using lentiviral constitutive CRISPR/Cas9 expression.
- (K) Examples of Western blot analyses of ES clones following CRISPR against RPAP1 using CRISPR/Cas9 expression systems which were transient in wild-type E14 ES cells (pX330; above), or constitutive in G4 ES cells (lentiviral; below).
- (L) CSI619 (RPAP1+/Trap) reporter ES cells stained for LacZ 3 days after CRISPR against RPAP1. Inset shows examples of ES colonies expanded from single cells and stained for LacZ (blue) expressed from the RPAP1  $\beta$ -geo reporter allele. Arrow: a white/non-stained colony, indicating that CRISPR has successfully mutated at least one of the RPAP1 alleles, by knocking out the RPAP1  $\beta$ -geo reporter allele. Bar chart below, shows the



percentage of non-staining colonies at Days +3 or +10 after CRISPR in the whole population. Significantly fewer non-staining colonies are observed at Day+10 (after a passage). This suggests that where CRISPR is active, and also knocks out the WT RPAP1 allele, the ES cells display a growth or survival phenotype within a few days.

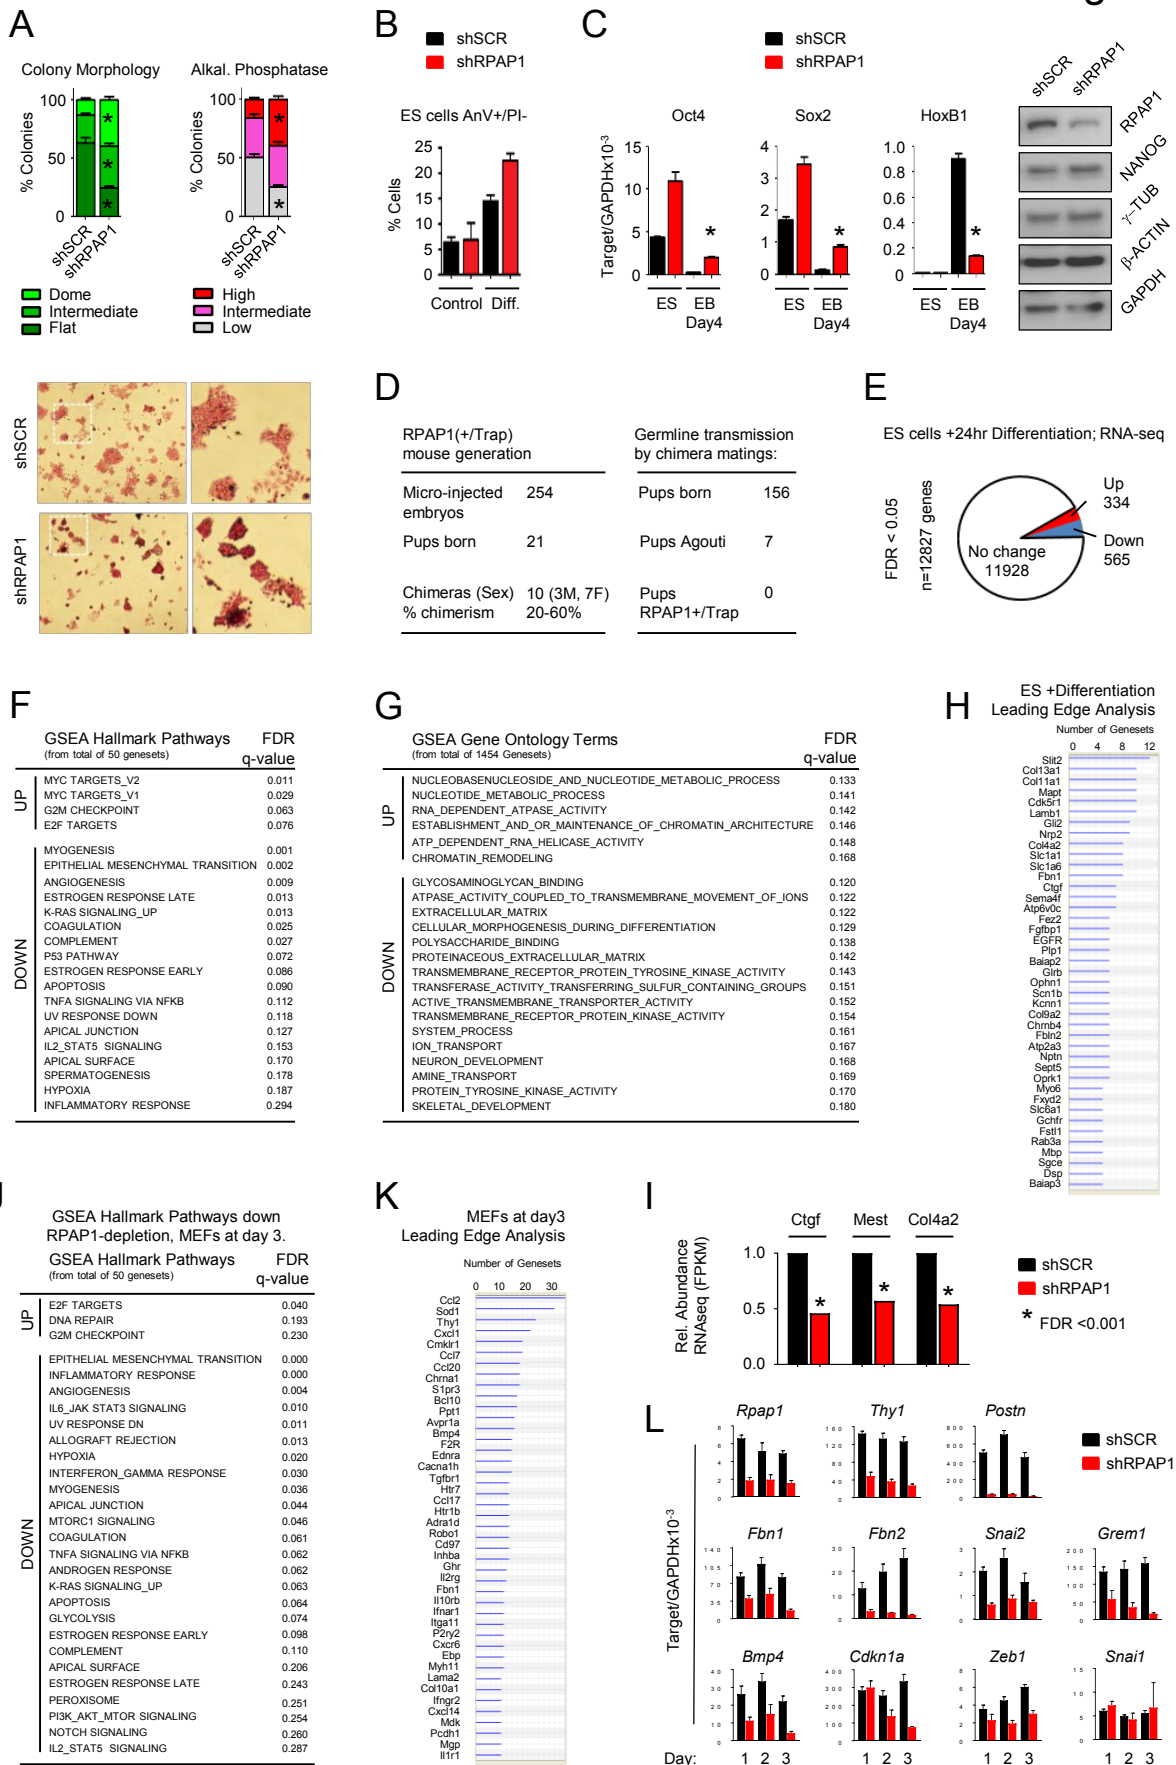

**Figure S2. RPAP1 is required for the establishment and maintenance of cell identity, Related to Figure 2.**

- (A) Following shRNA-knockdown of RPAP1, ES cells were differentiated for 24 hours by LIF-removal, then fixed and scored per colony for morphology and Alkaline Phosphatase staining intensity. Photographs show examples of the delay in colony morphology changes and delay in attenuation of AP-staining intensity associated with RPAP1-depletion at +24 hours after LIF-removal. Mean $\pm$ SEM, n=3 replicates; \*p<0.05.
- (B) FACS analyses for apoptosis levels by AnnexinV/Propidium Iodide double-staining in ES cells following induction of differentiation by LIF-removal for 24 hrs and then addition of retinoic-acid for 48hrs.
- (C) qPCR analyses of pluripotency or cardiac development markers at the indicated time points from the EB differentiation assay in **Figure 2A**. Mean $\pm$ SD, n=3 replicates; \*p<0.05. Panel on right: Western blot confirming RPAP1 knockdown in ES cells during self-renewal.
- (D) On left, table summarizing the generation of chimeric mice using CSI619, RPAP1(+/-Trap) ES cells (1 wild-type and 1 null allele). A low percentage of chimeric pups survived to birth (21/254 micro-injected embryos), of which 10/21 pups displayed moderate chimerism based on coat colour (20-60% Agouti coat colour). On right, table summarizing the offspring generated by mating chimeric mice with each other, or with wild-type mice, to look for germline transmission. Of 156 pups born from these matings, 7 pups had Agouti coat colour, indicating that the parental RPAP1(+/-Trap) ES cells were viable. However, no pups carried the RPAP1(+/-Trap) genotype, suggesting that a single RPAP1 allele was insufficient for germline transmission.
- (E) Overview of differential gene expression in RNA-Seq transcriptome analysis of ES cells following RPAP1-knockdown then differentiation for 24 hours, as above, in **Figure S2A**. Proportional representation pie-chart indicates the proportion of mRNAs significantly up- or down-regulated with FDR q<0.05. See also **Table S1**.
- (F,G) Table summarizing the most significantly up- or downregulated Hallmark genesets (**F**), or GO-term genesets (**G**), identified by GSEA analysis in RPAP1-depleted ES cells after 24 of differentiation, as above, in **Figure S2A** (FDR q<0.05; see also **Tables S1 and S2**). Genesets with FDR q<0.25 are significant.
- (H) GSEA Leading Edge analysis of the most prevalent genes among those GO terms database genesets which were significantly downregulated in RPAP1-depleted ES cells after 24 hrs of differentiation, as above, in **Figure S2A** (FDR q<0.05; see also **Tables S1 and S2**).
- (I) Normalized RNA-seq expression levels of mesenchymal, fibroblastic and development markers in RPAP1-depleted ES cells after 24 of

differentiation, as above, in **Figure S2A**. Data based on Mean FPKM values, n=3 replicates; \* FDR q-value <0.05. See also **Table S1**.

- (J) Table summarizing the most significantly up- or down-regulated hallmark genesets identified by GSEA analysis of RNA-seq data at day 3 after RPAP1 depletion in MEFs (FDR  $q < 0.05$ ; see also **Tables S2 and S4**). Hallmark genesets with FDR  $q < 0.25$  are significant.
- (K) Table summarizing GSEA Leading Edge analysis of the most prevalent genes among the genesets which were significantly downregulated at day 3 after RPAP1 depletion in MEFs (FDR  $q < 0.05$ ; see also Table S6) in a comparison versus the GSEA C5 GO terms database.
- (L) qPCR analyses of fibroblastic, mesenchymal and development markers at the indicated early time points after RPAP1 shRNA depletion in MEFs. Mean $\pm$ SD, n=3 replicates. Raw data from **Figure 2G** is displayed here relative to the housekeeper internal control *Gapdh* (whereas, in **Figure 2G**, the data is shown as fold-change, normalized to the shSCR non-targeting control).



## A

iPS Roadmap Significant Genes (FDR<0.05) TOP 500 genes vs MEFs+shRPAP1 Day3

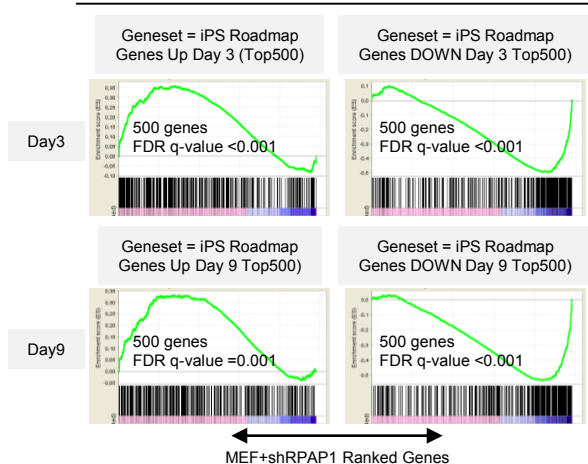

iPS Roadmap Significant Genes (FDR<0.05) TOP 100 genes vs MEFs+shRPAP1 Day3

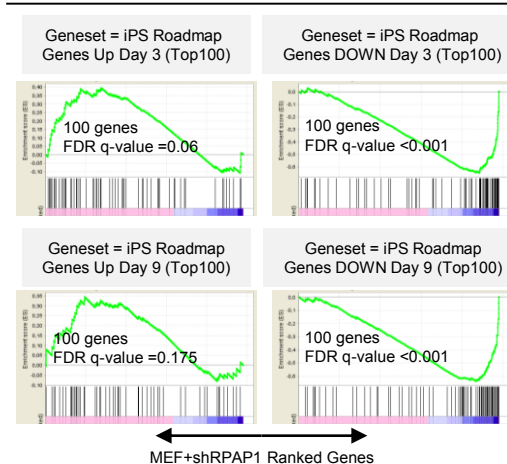

## B

MEFs+shRPAP1 Day3 Significant Genes (FDR<0.01) vs iPS Roadmap

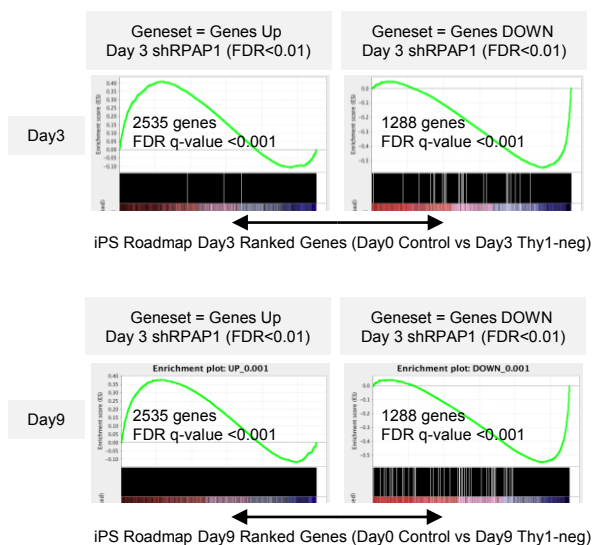

## C

Control = KSR/LIF standard iPS media

-plus 12 growth-factor/inhibitor combinations

Growth Promoters +Inhibitors:

FGF2 @10ng/mL  
EGF @20ng/mL  
Alki (ALK4/5/7, SB431542) @2/4uM  
DLPC @1-5uM  
SCF @10ng/mL  
Forskolin @5uM  
5-AzadC @0.5-2uM  
VPA @0.5mM  
TSA @20nM  
BIX @100uM  
Kenpauillone @5uM  
Flavopiridol @50nM

Growth Factor Combinations

Control  
FGF2  
FGF2/EGF  
FGF2/Alki  
FGF2/DLPC  
FGF2/EGF/Alki  
FGF2/EGF/DLPC  
FGF2/EGF/Alki/DLPC  
FGF2/EGF/Alki/Scf  
FGF2/AZA  
FGF2/VPA  
FGF2/TSA  
FGF2/Kenpauillone  
FGF2/Forskolin  
FGF2/Flavopiridol

## D

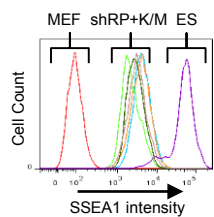

## E

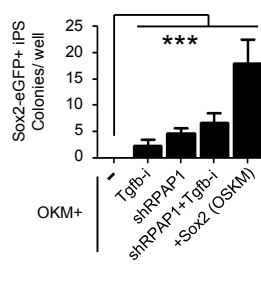

**Figure S3. RPAP1-knockdown favors de-differentiation and reprogramming, Related to Figure 3.**

- (A)** GSEA comparison of gene expression at day 3 after RPAP1 depletion in MEFs, versus, a published iPS roadmap gene expression profile (Polo et al., 2012). See Methods for assessment of the iPS Roadmap data from control MEFs versus Thy1-negative cells at day 3, or day 9, of reprogramming. The data here can be compared with **Figure 3A**. GSEA comparison of the published top 500 genes (on left), or Top 100 genes (on right (here, the reduced geneset size was used), up- or down-regulated at day 3, or day 9, of the iPS roadmap, versus, a ranked list of the gene expression profile at day 3 after RPAP1 depletion in MEFs in the current study (x-axis). FDR  $q < 0.25$  are significant.
- (B)** GSEA comparison of the significantly up- or down-regulated genes (FDR  $q < 0.01$ ) at day 3 after RPAP1 depletion in MEFs, versus, a ranked list of the published gene expression profile of the iPS roadmap at day 3, or day 9 (x-axis) as indicated. FDR  $q < 0.25$  are significant.
- (C)** Left: a list of growth factors and small molecule inhibitors, and the concentrations used, to test culture media supplementation in relation to the iPS reprogramming screen in **Figure 3E**. Right: the list of 12 combinations of the media supplements that were tested.
- (D)** Cells resembling putative reprogramming intermediates, which were generated by shRPAP1+*Klf4/cMyc* over-expression (see **Figure 3E**), were expanded to passage 4, then independent clones were analyzed for surface expression of SSEA1 by FACS. MEFs and ES cells were included as negative and positive controls for SSEA1 staining respectively.
- (E)** Sox2-eGFP-positive iPS colonies were counted per well at day14 following retroviral expression of the indicated combinations of Yamanaka factors, RPAP1 depletion, and/or TGF $\beta$ -signaling inhibition (see: Experimental Procedures). Mean  $\pm$ SD, 3 replicates; \*\*\* $p < 0.001$ , versus the control (lane 1).

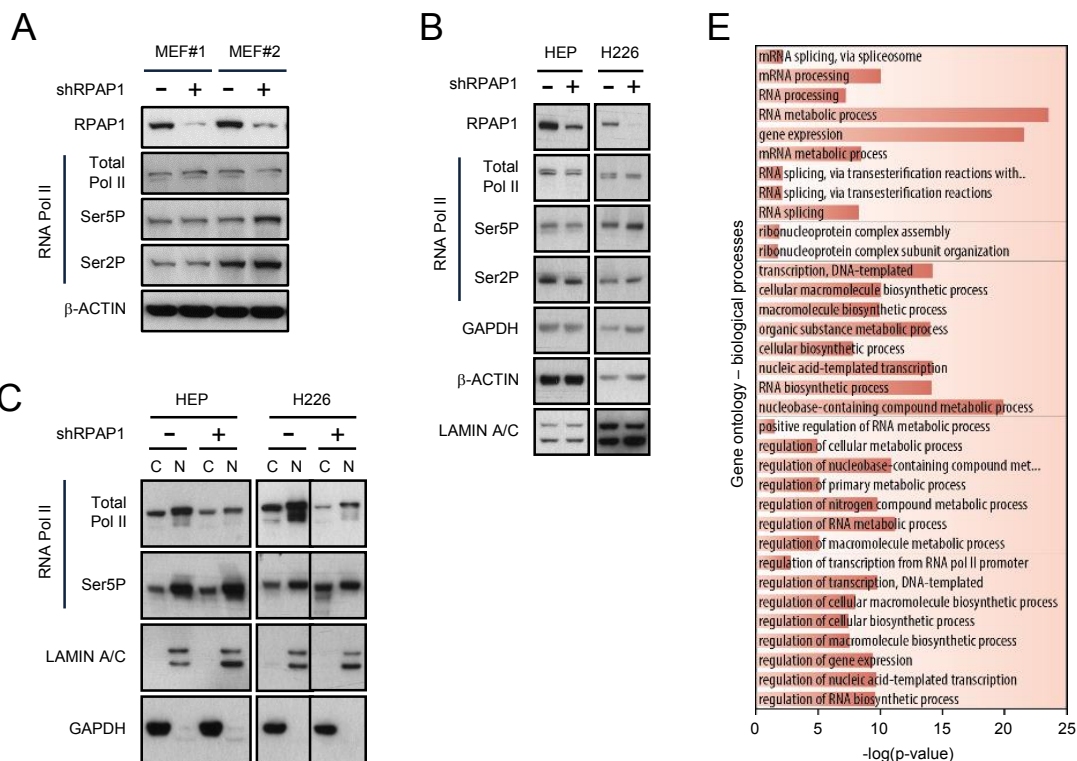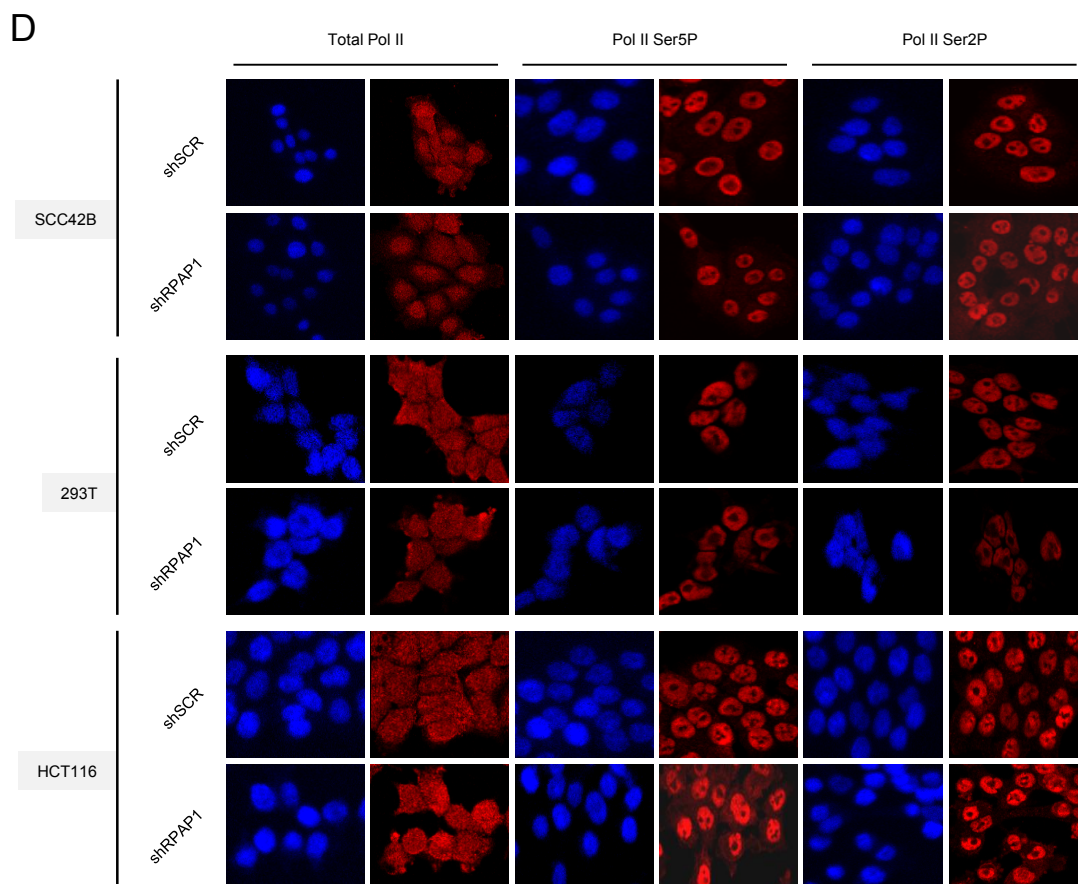

**Figure S4. RPAP1 regulates the Pol II interactome, not its expression or localization, Related to Figure 4.**

- (A,B)** Western blots of RPAP1, Pol II Total (RPB1), Ser5P, or Ser2P expression in whole cell lysates from two independent MEF lines at day 3 **(A)**, or from HEP and H226 cell lines **(B)**, at day 3 after lentiviral control (shSCR) or RPAP1 depletion (shRPAP1). GAPDH,  $\beta$ -ACTIN, and LAMIN A/C used as internal loading controls.
- (C)** Western blots of Pol II Total (RPB1), Ser5P, or Ser2P expression in Nuclear/Cytoplasmic fractions from HEP and H226 cell lines at day 3 after RPAP1 depletion. GAPDH and LAMIN A/C used as indicators of fraction separation. N, nuclear fraction. C, cytoplasmic fraction.
- (D)** Immunofluorescence of Pol II Total (RPB1), Ser5P or Ser2P in a range of human cell lines at day 3 after lentiviral control (shSCR) or RPAP1 depletion (shRPAP1). Nuclei stained with DAPI.
- (E)** Gene ontology analysis for the enrichment of biological processes among the Pol II interactors lost following RPAP1-depletion, with p-value corrected for multiple testing (Bonferroni).

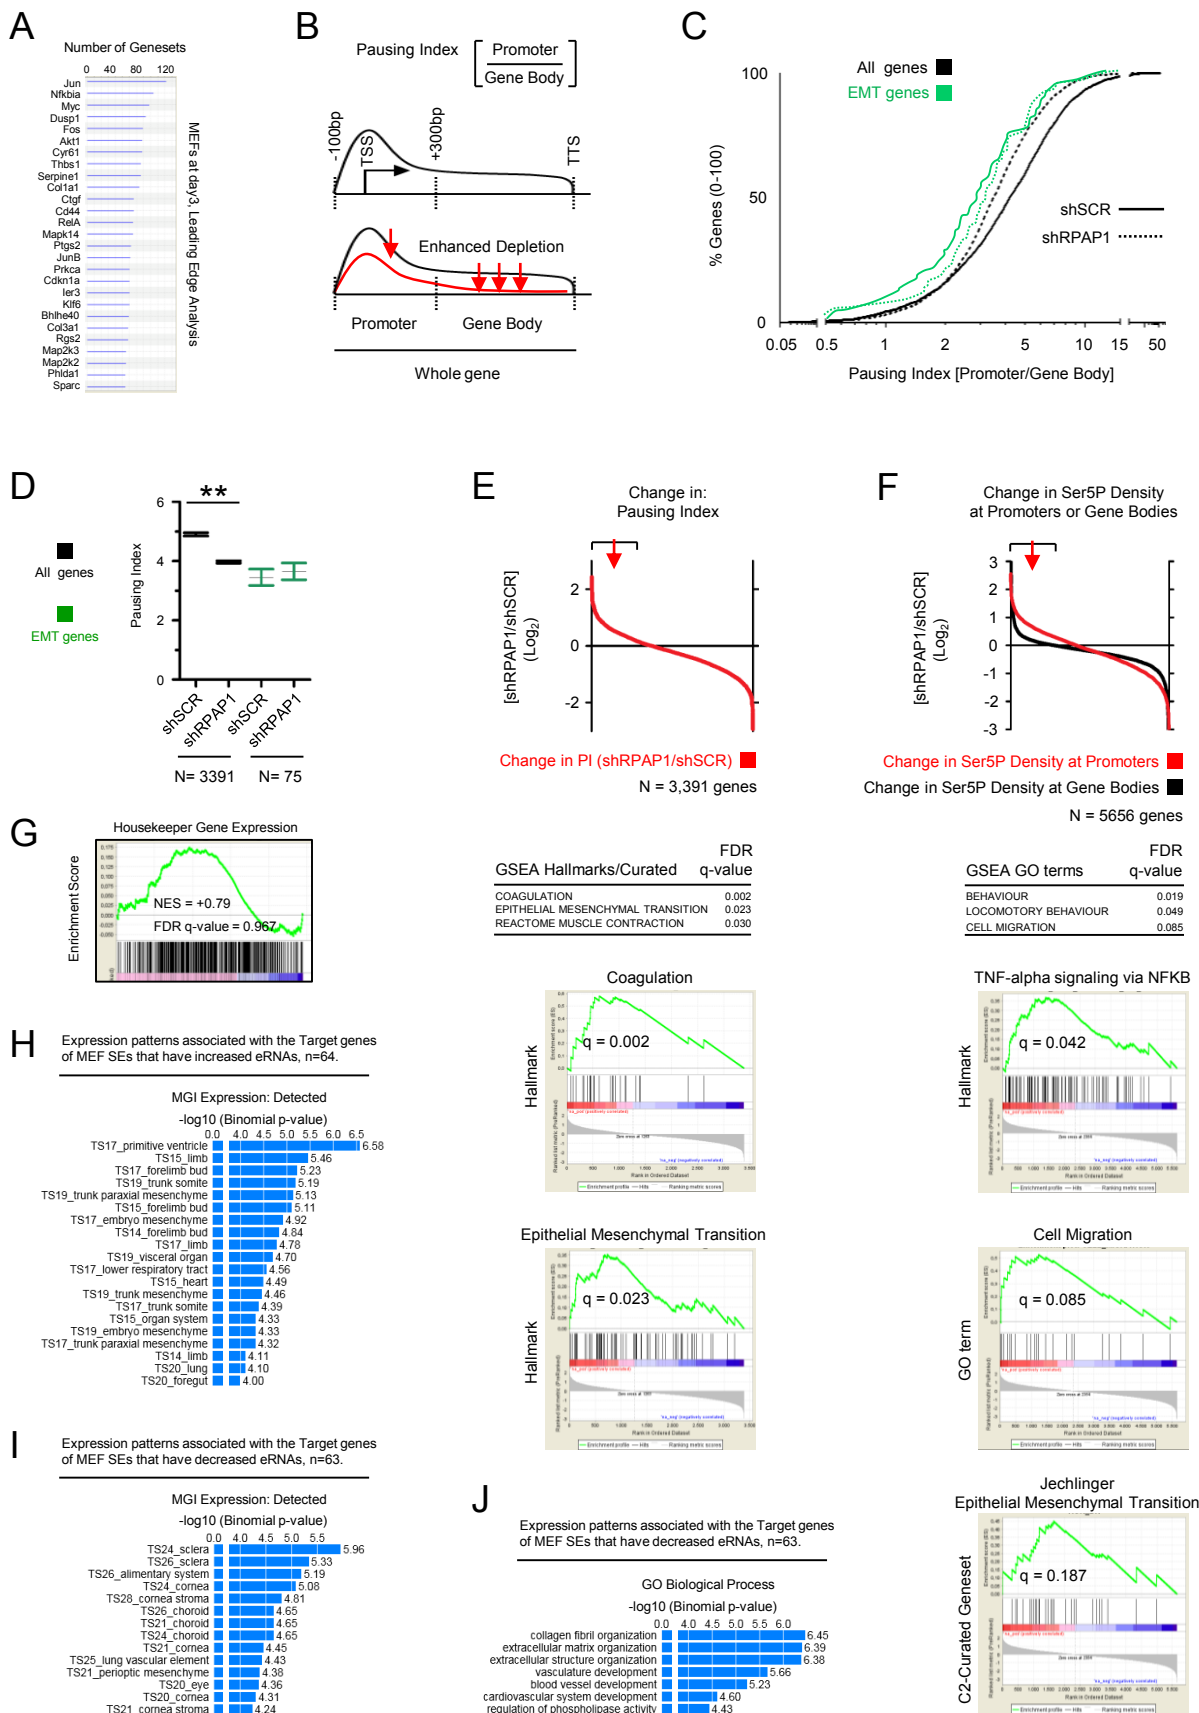

**Figure S5. RPAP1 is required for Pol II transcription in MEFs, particularly on developmental and mesenchymal genes, Related to Figure 5.**

- (A) GSEA Leading Edge analysis. The genesets which were significantly depleted in Pol II abundance were identified in MEFs at day 3 after RPAP1 depletion (see **Table S2**; and **Figure 5E**). The table lists the most prevalent genes among the GO term genesets.
- (B) Definition and analysis of Pol II loading ratio on Promoter-Body (or Pausing Index, PI). Schematics outline the parameters used to define the whole gene, promoter, gene body, and Pausing Index (PI) in this study, (see also **Supplemental Experimental Procedures and Table S5**). An example of preferential depletion of Pol II from the gene body is shown, in lower panel.
- (C,D) Plots showing the PI ratio for all genes, or all regulators of the Epithelial-Mesenchymal Transition (defined by the GSEA Hallmark geneset #M5930, MySigDB, Broad Institute). In (D), data are Mean +/- SEM of “n” genes as indicated; \*\*p<0.01. In (C) and (D), at day 3 after RPAP1 depletion in MEFs, the Mean PI significantly decreases for many genes ( $\Delta$ PI <1.0), however, the Mean PI increases for EMT-regulatory genes ( $\Delta$ PI >1.0). This is consistent with preferential depletion of Pol II from the gene body, as depicted in lower panel of (B), above.
- (E) Ratio of shRPAP1/shSCR for the change in PI for each gene ( $\Delta$ PI), at day 3 after lentiviral control (shSCR) or RPAP1 depletion (shRPAP1) in MEFs. Arrow highlights the region containing genes with increased PI at their promoters. Table shows the top three GSEA results which identify that genesets and genes with increased pausing index (region highlighted in plot) are enriched for MEF cell identity and developmental regulators (FDR q<0.25 is significant). Below: examples of GSEA plots for the most significantly enriched genesets with increased PI (see also **Table S5** for PI calculations per gene, and **Table S2** for full GSEA results).
- (F) Graph of the change in Ser5P density comparing shRPAP1/shSCR, at the promoter (red), or in the gene body, (black). Data from day 3 after lentiviral control (shSCR) or RPAP1 depletion (shRPAP1) in MEFs. Arrow highlights the region containing genes with increased Pol II Ser5P density at their promoters. GSEA analyses were performed on the entire ranked lists for promoters (red line) or the gene bodies (black line), however, significant enrichment of genesets was only observed for those genes with increased Pol II Ser5P density at their promoters (Red plot line, region as indicated by arrow). Table below shows the top three GSEA results which identify that genes with increased promoter Ser5P density (region highlighted in red plot line by arrow, above) are enriched for cell identity and developmental regulators (FDR q<0.25 is significant). Below: examples of GSEA plots for the most significantly enriched genesets with



increased Ser5P density at their promoter (see also **Table S5** for Ser5P density calculations per gene, and **Table S2** for full GSEA results).

- (G)** GSEA to assess mRNA expression levels of housekeeper genes, (as defined: see **Supplemental Experimental Procedures**) in primary MEFs at day3 after RPAP1 knockdown. No significant change in housekeeper geneset expression was observed.
- (H)** Developmental stages significantly associated with the super-enhancer target genes ( $P < 10^{-4}$ ) where the enhancers display increased eRNA levels in MEFs at day 3 after RPAP1 knockdown.
- (I,J)** Developmental stages (**I**) and GO Biological Processes (**J**) significantly associated with the super-enhancer target genes ( $P < 10^{-4}$ ) where the enhancers display decreased eRNA levels in MEFs at day 3 after RPAP1 knockdown.

## **SUPPLEMENTAL EXPERIMENTAL PROCEDURES**

Content list:

### **Resource Tables**

- Primers
- Antibodies
- shRNAs
- CRISPR-Cas9 gRNAs and vectors

### **Contact for Reagent and Resource sharing**

### **Experimental Models and Subject Details**

- Mice
- Cells and Culture Conditions

### **Method Details**

- CRISPR/Cas9-based gene editing
- Production of Retrovirus and Lentivirus, and infection of recipient cells
- Generation of iPS cells from primary MEFs or i4F-MEFs
- Growth factors and small molecules to improve iPS reprogramming
- Differentiation with retinoic acid
- EB Hanging-Drop Differentiation
- Wound healing scratch assay
- Cytometry
- Cell lysis and Western blot
- Histopathology and Immunohistochemistry
- Immunofluorescence
- RNA Pol II interactome analysis and LC/LC Mass Spectrometry
- Immunoprecipitate sample preparation for Mass Spectrometry.
- LC-MS/MS Analysis
- Protein Pol II-interactome Data Collection and Analysis
- Protein Pol II-interactome Functional analysis
- RNA isolation and Quantitative real-time PCR (qPCR)
- RNA-seq transcriptomic analyses
- Functional analyses of differential gene expression
- Supervised Network Analysis
- Comparison of differential gene expression with the iPS roadmap
- Conversion of Plant gene expression data to Mammalian homologs
- Chromatin Immunoprecipitation (ChIP) and deep-sequencing
- Pol II ChIP-seq data analyses
- Definition of MEF super-enhancers, their target genes, and eRNA levels

### **Quantification and Statistical Analysis**

### Data and Software availability

Accession numbers: Three datasets (two RNA-seq and one ChIP-seq experiment) are available from the GEO database, Accession: GSE78795. The mass spectrometry proteomics data are available from the ProteomeXchange Consortium/PRIDE repository with the dataset identifier PXD007114.

### RESOURCE TABLE

Primers, Antibodies, shRNAs, gRNAs and Cas9 expression systems used in this study are listed in the following Resource Tables:

### PRIMERS

| qRT-PCR primers used in this study |                                    |                                 |
|------------------------------------|------------------------------------|---------------------------------|
| Target mouse genes                 | Forward                            | Reverse                         |
| $\beta$ -Actin                     | GGCACCACACCTTCTACAATG              | GTGGTGGTGAAGCTGTAGC<br>C        |
| Gapdh                              | TTCACCACCATGGAGAAGGC               | CCCTTTTGGCTCCACCCT              |
| Pou5f1/Oct4                        | TCTTTCCACCAGGCCCGGCT<br>C          | TGCGGGCGGACATGGGGAG<br>ATCC     |
| Sox2                               | TAGAGCTAGACTCCGGGCGAT<br>GA        | TTGCCTTAAACAAGACCAC<br>GAAA     |
| Klf4                               | GCGAACTCACACAGGCGAGAA<br>ACC       | TCGCTTCCTCTTCCTCCGAC<br>ACA     |
| Nanog                              | CAGGTGTTTGAGGGTAGCTC               | CGGTTCATCATGGTACAGT<br>C        |
| RPAP1                              | CACCCTTCTCTGCCTGGGCC               | TAGCAGCTGCGGATGCTGG<br>G        |
| E-cadherin<br>/Cdh1                | TTTTCGGAAGACTCCCGATTC<br>A         | AGCTTGTGGAGCTTTAGAT<br>GC       |
| N-cadherin<br>/Cdh2                | CTGATAGCCCGGTTTCACTTG              | CAGGCTTTGATCCCTCTGG<br>A        |
| Zscan4c                            | GAGATTCATGGAGAGTCTGAC<br>TGATGAGTG | GCTGTTGTTTCAAAGCTTG<br>ATGACTTC |
| BMP4                               | CGCTTCTGCAGGAACCAATGG<br>AGC       | CCGGTCTCAGGTATCAAAC<br>TAGC     |
| Cytokeratin1<br>4                  | GACCATCGAGGACCTGAAGAG<br>CAAGAT    | GCCTCCACGCTCATGCGCA<br>GGCTC    |

|                            |                               |                                |
|----------------------------|-------------------------------|--------------------------------|
| Cardiac $\alpha$ -Actinin  | CTGGTATTGCCGATCGTATG          | CTTGCTGATCCACATTTGCT           |
| Atrial Natriuretic Peptide | ACTAGGCTGCAACAGCTTCC          | TGACACACCACAAGGGCTT<br>A       |
| Snai1                      | CACACGCTGCCTTGTGTCT           | GGTCAGCAAAGCACGGTT             |
| Snai2                      | TGGTCAAGAAACATTTCAACG<br>CC   | GGTGAGGATCTCTGGTTTT<br>GGTA    |
| Zeb1                       | GCTGGCAAGACAACGTGAAAG         | GCCTCAGGATAAATGACGG<br>C       |
| Zeb2                       | CAGGCTCGGAGACAGATGAAG         | CTTGCAGAATCTCGCCACT<br>G       |
| Twist1                     | GGACAAGCTGAGCAAGATTCA         | CGGAGAAGGCGTAGCTGAG            |
| Cdkn1a/p21                 | GTGGGTCTGACTCCAGCCC           | CCTTCTCGTGAGACGCTTAC           |
| Cdkn2a/p16                 | CGTACCCCGATTTCAGGTGAT         | TTGAGCAGAAGAGCTGCTA<br>CGT     |
| Thy1                       | TTACCCTAGCCAACTTCACCAC<br>CA  | AAATGAAGTCCAGGGCTTG<br>GAGGA   |
| Fbn1                       | TCGAGTCCTACACGAGCCATG<br>G    | ACCAGGTAAGGTTTTCCAT<br>CCAGG   |
| Fbn2                       | CTGACGAAGGGTGGTCAGAC          | GCCAAGAGCGCACAGAAG<br>GAG      |
| Fn1                        | AGAGGCAGGCTCAGCAAAT           | TGCTTCCCATTGTCAAAC<br>A        |
| Grem1                      | ACTAGGTGCGCCCTTCGCAGAC        | GGTCCTCAGGTTCTTCGCTG<br>TGG    |
| Postn                      | ACAACAATCTGGGGCTTTTT          | AATCTGGTTCCTATGGATG<br>A       |
| Hoxb1                      | CCCTTCCAACCTCAGTTCAGTGC<br>CT | TTGGTGGCGATTGGGCTCA<br>CACTC   |
| Ccnd1                      | TAGGCCCTCAGCCTCACTC           | CCACCCCTGGGATAAAGCA<br>C       |
| Meox1                      | ATTGCATGGTACTTGGGACGAT<br>CG  | ATATCTCCGGAGCCGGGTC<br>AGG TAG |
| Meox2                      | GAGAACTAGAGGCAGAATTTG<br>CCC  | CCTGACAGCTCTGACGGAA<br>GAAG    |
| Nup210                     | TTTATAAAGCTGCAGACAAAC<br>AGG  | CCATCAAGGACACGGTAGC            |
| Ccl2                       | TCCACGTGTTGGCTCAGCCAGA<br>TG  | CAGCTTCTTTGGGACACCT<br>GCTGC   |
| Ccnb1                      | TGGCCTCACAAAGCACATGA          | GCTGTGCCAGCGTGCTAAT<br>C       |
| Lcelf                      | CACTGATCTTGTGCTGTCCACA        | CAGCATCCTCCAGAGCTAC            |

|                     | GTCT                           | AGCAG                        |
|---------------------|--------------------------------|------------------------------|
| Lce1h               | CTGGCTGACTGAGATACCCAC<br>AGATC | CCAAGCTACAGCAGGAAGA<br>CACAG |
| E2F2                | AATTGTGCGATGTGCACCCGCA<br>GG   | AGCACCTCGGCTGCCCAGT<br>TCAG  |
| Rasgef1b            | GTACTACCATGACAACAACCTC<br>C    | TCATCTGGTTCTTATCGCCG<br>TCC  |
| Sprr1a              | ACAGAGAACCTGCTCTTCTCTG<br>AG   | CTTGGGGTTGCAGGGCTCA<br>GGAAC |
| Fibrillarin<br>/Fbl | CCGAGGTGGGGGCTTCCAGTCT<br>G    | GGATAGCTGCTGCCAGCTT<br>GGAGC |
| Foxc2/Mfh1          | AGAACAGCATCCGCCACAAC           | GCACTTTCACGAAGCACTC<br>ATT   |
| Desmoplaki<br>n/Dsp | ACCGTCAACGACCAGAACTC           | TTTGCAGCATTTCTTGGATG         |

| <b>ChIP-qPCR primers (locus indicated in brackets)</b>               |                               |                               |
|----------------------------------------------------------------------|-------------------------------|-------------------------------|
| <b>Target (mouse genes)<br/>(position relative to<br/>TSS, size)</b> | <b>Forward</b>                | <b>Reverse</b>                |
| Mapk1 (Erk2) 1F-1R<br>(Promoter: +19 to<br>+160, 122bp)              | TCCCACCTCGTAGCCCGC<br>CCGTC   | CGCAGGAACCGCGCTGC             |
| Map2k1 (Mek1) 2F-2R<br>(Promoter: +25 to<br>+149, 125bp)             | GCGGCGTCTCGGAGCGC<br>CGGAGC   | AACTCTCGCCTCAGCACA<br>CCGGTTC |
| Map2k2 (Mek2) 1F-1R<br>(Promoter: +32 to<br>+123, 92bp)              | TGCGCTGCAGCGTCAGC<br>TTCACCTC | TAGGCCGGGCAGAAGGT<br>GGAAGG   |
| Eif1a 1F-1R (Promoter:<br>+12 to +111, 100bp)                        | TGGCCGGCCGTTGCCTA<br>GGAAG    | AACTTGGTACTCACAGTG<br>ACC     |

## ANTIBODIES

| <b>Antibodies used in this study</b> |                    |                                       |
|--------------------------------------|--------------------|---------------------------------------|
| <b>Target</b>                        | <b>Company</b>     | <b>Code</b>                           |
| RPAP1                                | Proteintech        | 15138-1-AP                            |
| RPAP1                                | Cosmo Bio          | MK14030910                            |
| RPAP1                                | Abcam              | ab21827                               |
|                                      |                    |                                       |
| Nanog                                | Chemicon/Millipore | #AB5731                               |
| Total RNA Pol II (RPB1)              | Santa Cruz         | sc-899x (N-20)                        |
| RNA Pol II Ser-5P                    | Abcam              | ab5131                                |
| RNA Pol II Ser-2P                    | Abcam              | ab5095                                |
| Gapdh                                | Sigma              | G8795                                 |
| $\beta$ -Actin                       | Sigma              | A5441                                 |
| $\gamma$ -Tubulin                    | Sigma              | #T6557, CLONE GTU-88<br>ascites fluid |
| Lamin A/C                            | Santa Cruz         | sc-6215 (N-18)                        |



## shRNAs

| <b>shRNAs used in this study</b>                                                                                                                            |                                                         |                                                |                                      |
|-------------------------------------------------------------------------------------------------------------------------------------------------------------|---------------------------------------------------------|------------------------------------------------|--------------------------------------|
|                                                                                                                                                             |                                                         |                                                |                                      |
| From: Open Biosystems (#RMM4534-NM_177294; TRC Mission Library) with a pLKO.1 lentiviral backbone.                                                          |                                                         |                                                |                                      |
| From these 5 shRPAP1 shRNA clones we identified that the best knockdown of RPAP1 expression was achieved using clone TRCN0000173186, hereafter “shRPAP1#5”. |                                                         |                                                |                                      |
| <b>shRNA clone</b>                                                                                                                                          | <b>Clone</b>                                            | <b>Target Sequence 21bp (mature antisense)</b> | <b>Locus on target transcript</b>    |
| shRPAP1#1                                                                                                                                                   | TRCN0000176144                                          | AAAGGCTCAAACAATGTGCTC                          | At +4581; in the 3'-UTR              |
| shRPAP1#2                                                                                                                                                   | TRCN0000174973                                          | TATCATGATGTAATACGAGTC                          | At +4616; in the 3'-UTR.             |
| shRPAP1#3                                                                                                                                                   | TRCN0000173273                                          | TTGGGAAGCTTATAGTGGAGG                          | At +4354; in the 3' of Coding region |
| shRPAP1#4                                                                                                                                                   | TRCN0000173170                                          | ATGATACCAAGAGAAGGTGCG                          | At +1745; Central to Coding region   |
| shRPAP1#5                                                                                                                                                   | TRCN0000173186                                          | TTGAGGTTTGGCAAGACTTGG                          | At +3871; in the 3' of Coding region |
| shSCR non-targeting                                                                                                                                         | scramble shRNA was acquired from Addgene (plasmid 1864) |                                                | Non-targeting                        |

## CRISPR-Cas9 guide RNAs and vector systems

| CRISPR gRNAs used in this study (related to Figure S1) |                                                 |                                                 |                         |                         |                      |                                |
|--------------------------------------------------------|-------------------------------------------------|-------------------------------------------------|-------------------------|-------------------------|----------------------|--------------------------------|
| Guide RNA name                                         | Target sequence                                 |                                                 | Location in Rpap1       | Predicted %AA's deleted | Mouse or human RPAP1 | Next best hit                  |
| <b>Transient system/ pX330</b>                         | Forward ( <i>additional bases for cloning</i> ) | Reverse ( <i>additional bases for cloning</i> ) |                         |                         |                      |                                |
| mRPAP1 CRISPR_A                                        | CACCGCACAGACCAAA<br>TCTAGTCAC                   | AAACGTGACTAGATT<br>TGGTCTGTGC                   | Mid Exon 7              | ~80%                    | mouse                | 16/20                          |
| mRPAP1 CRISPR_B                                        | CACCGCCCTTCTCTGT<br>GACTAGATT                   | AAACAATCTAGTCAC<br>AGGAAAGGGC                   | Mid Exon 7              | ~80%                    | mouse                | 18/20 hit in intergenic region |
| mRPAP1 CRISPR_C                                        | CACCGCCTGTGTTCCA<br>TCGCTCTC                    | AAACGAGAGCGATGG<br>AACACAGGC                    | Mid Exon 5              | ~85%                    | mouse                | 15/20                          |
| mRPAP1 CRISPR_D                                        | CACCGTCGTGAGGCAG<br>CGGGTGACC                   | AAACGGTCACCCGCT<br>GCCTCACGAC                   | Mid Exon 4              | ~90%                    | mouse                | 14/20                          |
|                                                        |                                                 |                                                 |                         |                         |                      |                                |
| <b>Constitutive system/ pLentiCRISP Rv2</b>            | Forward ( <i>additional bases for cloning</i> ) | Reverse ( <i>additional bases for cloning</i> ) |                         |                         |                      |                                |
| mRPAP1 CRISPR_A                                        | CACCGCACAGACCAAA<br>TCTAGTCAC                   | AAACGTGACTAGATT<br>TGGTCTGTGC                   | Mid Exon 7              | ~80%                    | mouse                | 16/20                          |
| mRPAP1 CRISPR_B                                        | CACCGCCCTTCTCTGT<br>GACTAGATT                   | AAACAATCTAGTCAC<br>AGGAAAGGGC                   | Mid Exon 7              | ~80%                    | mouse                | 18/20 hit in intergenic region |
| mRPAP1 CRISPR_C                                        | CACCGCCTGTGTTCCA<br>TCGCTCTC                    | AAACGAGAGCGATGG<br>AACACAGGC                    | Mid Exon 5              | ~85%                    | mouse                | 15/20                          |
| mRPAP1 CRISPR_D                                        | CACCGTCGTGAGGCAG<br>CGGGTGACC                   | AAACGGTCACCCGCT<br>GCCTCACGAC                   | Mid Exon 4              | ~90%                    | mouse                | 14/20                          |
|                                                        |                                                 |                                                 |                         |                         |                      |                                |
| hRPAP1-1                                               | CACCGATGCTGTGCGAG<br>ACCGAAGCC                  | AAACGGCTTCGGTCT<br>CGACAGCATC                   | Mid Exon 2 at ATG start | 100%                    | human                | 13/20                          |
| hRPAP1-2                                               | CACCGCAGAGTCAGTT<br>TCTCGCAGC                   | AAACGCTGCGAGAAA<br>CTGACTCTGC                   | Mid Exon 2              | ~99%                    | human                | 17/20                          |
| hRPAP1-3                                               | CACCGTCACCACATCC<br>CGATGGTCC                   | AAACGGACCATCGGG<br>ATGTGGTGAC                   | Mid Exon 2              | ~99%                    | human                | 13/20                          |
| hRPAP1-4                                               | CACCGTGCTGTGTTCC<br>TTCGCTCGC                   | AAACGCGAGCGAAG<br>GAACACAGCAC                   | Mid Exon 4              | ~97%                    | human                | 17/20                          |
|                                                        |                                                 |                                                 |                         |                         |                      |                                |
| <b>Inducible system/ pLKV-U6 in ESCas9 cells</b>       | Forward ( <i>additional bases for cloning</i> ) | Reverse ( <i>additional bases for cloning</i> ) |                         |                         |                      |                                |
| mRPAP1 CRISPR_A                                        | CACCGCACAGACCAAA<br>TCTAGTCACGT                 | TAAAACGTGACTAGA<br>TTTGGTCTGTGC                 | Mid Exon 7              | ~80%                    | mouse                | 16/20                          |
| mRPAP1 CRISPR_C                                        | CACCGCCTGTGTTCCA<br>TCGCTCTCGT                  | TAAAACGAGAGCGAT<br>GGAACACAGGC                  | Mid Exon 5              | ~85%                    | mouse                | 15/20                          |
| mRPAP1 CRISPR_D                                        | CACCGTCGTGAGGCAG<br>CGGGTGACCGT                 | TAAAACGGTCACCCG<br>CTGCCTCACGAC                 | Mid Exon 4              | ~90%                    | mouse                | 14/20                          |
| mRPAP1 CRISPR_E                                        | CACCGCATCCCGATGG<br>TCCTGCGGTGT                 | TAAAACACCGCAGGA<br>CCATCGGGATGC                 | 3' end of Exon3         | ~96%                    | mouse                | 14/20                          |
| mRPAP1 CRISPR_F                                        | CACCGATGCTGTCCAG<br>ACCGAAGCCGT                 | TAAAACGGCTTCGGT<br>CTGGACAGCATC                 | Exon 3, in ATG start    | 100%                    | mouse                | 15/20                          |

|  |  |  |       |  |  |  |
|--|--|--|-------|--|--|--|
|  |  |  | codon |  |  |  |
|--|--|--|-------|--|--|--|

### CRISPR-Cas9 Expression System and guide RNA combinations used

| Expression System       | Delivery Method | Plasmid                         | guide RNA combinations used (Related to <b>Figure S1</b> ) |
|-------------------------|-----------------|---------------------------------|------------------------------------------------------------|
| Transient               | Electroporation | pX330 (Addgene #42230)          | A, B, C, D, AC, BD, A-D                                    |
| Constitutive (in mouse) | Lentivirus      | pLentiCRISPRv2 (Addgene #52961) | A, B, C, D, A-D                                            |
| Constitutive (in human) | Lentivirus      | pLentiCRISPRv2 (Addgene #52961) | 1, 2, 3, 4                                                 |
| Inducible               | Doxycyclin      | pLKV-U6 (Addgene #50946)        | A, C, D, E, F, A-F                                         |

## CONTACT FOR REAGENT AND RESOURCE SHARING

Please contact Manuel Serrano. [Manuel.serrano@irbbarcelona.org](mailto:Manuel.serrano@irbbarcelona.org)

## EXPERIMENTAL MODEL AND SUBJECT DETAILS

### Mice

Animal experimentation at the CNIO, Madrid, was performed according to protocols approved by the CNIO-ISCIII Ethics Committee for Research and Animal Welfare (CEIyBA).

### Cells and culture conditions

Primary mouse embryo fibroblasts (wild-type, MEFs, passage 2) were obtained at E13.5 from pure inbred C57BL6 background mice, as described previously (Palmero et al., 2001). Immortalized primary mouse hepatocytes HEP cells have been previously described (Lopez-Guadamillas et al., 2016). Mouse P19EC cells, monkey COS7 cells, and the human cell lines 293T, HCT116, SCC42B and H226 were from ATCC. All the above-mentioned cells were maintained in DMEM medium with 10% FBS (Gibco) with antibiotics (penicillin/streptomycin 100 U/ml). The mouse ES cells E14Tg2a.4 (wild-type parental) and CSI619 RPAP1 (+/Trap) mouse ES cells containing a pGT0Lxf genetrap with *LacZ* reporter in Intron8 were from BayGenomics/MMRRC genetrap resource, University of California. Nanog-GFP knockin mouse ES cells (TNGA) were previously described (Chambers et al., 2007) and were shared by the laboratory of Austin Smith. The mouse ES cells R1, G4, doxy-inducible ESCas9 as described (Ruiz et al., 2016). HAP1 cells (a kind gift from T Brummelkamp) were grown in IMDM (Invitrogen) and 15%FBS. The Sox2-eGFP MEFS (Sox2-Promoter/GFP transgenic) were as described (D'Amour and Gage, 2003). Mouse ES cells and iPS cells, were routinely cultured on gelatin-coated plates in either "Serum/LIF" (15% FBS), or Knockout Serum Replacement (KSR, Invitrogen) "KSR/LIF" (15% KSR), in DMEM (high glucose) basal media, with LIF (1000 Units/mL), non-essential amino acids, glutamax and beta-mercaptoethanol plus antibiotics. Where used, the "2i" drug cocktail comprised 1  $\mu$ M Mek-inhibitor (PD0325901, Axon Medchem, #1408) plus 3  $\mu$ M GSK3b-inhibitor (CHIR 99021, Axon Medchem #1386) as described (Ying et al., 2008). Reprogrammed iPS cells were initially derived and expanded on mitomycin-C inactivated feeder cells on gelatin-coated plates, before transfer to gelatin-only. Cultures were routinely tested for mycoplasma and were always negative. C57BL/6 ES cells were derived at the Transgenic Mice Unit of the Spanish National Cancer Research Center (commonly abbreviated as CNIO, from the name in Spanish: Centro Nacional de Investigaciones Oncológicas) from E4.5 C57BL6 blastocysts, or mixed background C57BL6/129 blastocysts. ES cell self-renewal and pluripotency was scored, by cytometry (Nanog-GFP heterogeneity and overall intensity), by immunofluorescence (see below), by colony morphology (see **Figures S1D and S2A**), by alkaline phosphatase staining of fixed cells (Promega #S3771), and by qPCR for stemness markers Nanog, Oct4 and Sox2 (See: **Figures 2B and S2C**), in addition to their differentiation capacity in retinoic acid or embryoid body cardiac centre development (see below). To inhibit CRM1-dependent nuclear export, cells were treated for 3 hrs

with 10 nM Leptomycin B (Sigma #L2913). For proliferation curves, cells were counted and serially passaged every 3 days to monitor the cumulative doubling rate. Senescence-associated  $\beta$ -gal staining was performed as described (Munoz et al., 2013). Staining for *LacZ* expression in the CSI619 ES cells RPAP1(+/-Trap), where the genetrap contains a  $\beta$ -geo reporter, was performed as described (Munoz et al., 2013).

## METHOD DETAILS

### CRISPR/Cas9-based gene editing

To target human or mouse RPAP1 sequences, we used the MIT CRISPR design tool (<http://tools.genome-engineering.org>) to design the sgRNAs as described (Ran et al., 2013). Six mouse sgRNAs were used targeting mouse/human RPAP1 Exons 4-7 (see **Figure S1I**) or 4 sgRNAs targeting human RPAP1 Exons 2-4, either individually to generate indels, or in combinations to generate deleted regions (see: **Resource Tables**, in **Supplemental Experimental Procedures**, for sgRNA sequences, plasmid details and gRNA combinations used). RPAP1-knockout was assessed by Western blot of entire cellular pools, or derivation and expansion of individual clones.

Briefly, three CRISPR strategies were pursued. Transient CRISPR/Cas9 expression was by electroporation of mouse ES cells (Neon Transfection System; 1200V, 20 msec, 2 pulses) using the pX330 plasmid (Addgene #42230). Constitutive CRISPR/Cas9 expression was by pLentiCRISPRv2 (Addgene: #52961) as described (Ruiz et al., 2010). For the human HAP1 cell line, human specific CRISPR-sgRNAs oligos (**Resource Tables**, in **Supplemental Experimental Procedures**) were cloned into the pLenti-CRISPRV2 (Addgene plasmid #52961). For doxycyclin-inducible CRISPR/Cas9: CRISPR-sgRNAs oligos cloned into the pKLV-U6-gRNA (BbsI)-PGKpuro2ABFP (Addgene #50946) to generate doxy-inducible ESCas9 cells as described (Ruiz et al., 2016). Individual lentiviral vectors pKLV-U6gRNA-PGKpuro2ABFP (Addgene #50946) or pLentiCRISPR v2 (Addgene plasmid #52961) were co-transfected with third generation packaging vectors in 293T cells using Lipofectamine 2000 (Invitrogen) in order to generate viral supernatants as described (Ruiz et al., 2010). A total of  $10^5$  ES cells were infected in suspension with 500  $\mu$ ls of viral supernatant for 1 hour at 37°C and plated on a layer of fresh feeder cells. Two days after infection, G4 and R1 ES cells were selected with Puromycin 1  $\mu$ g/ml and maintained for a week in culture in order to allow efficient gene editing. For the doxycycline-inducible ESCas9 cell line (Ruiz et al, 2016), two days after infection, cells were split into media with or without 1  $\mu$ g/ml doxycycline and maintained for an additional week in culture in order to allow efficient gene editing. In the case of Hap1 cells, spinfection was used to infect as follows: a total of  $10^5$  HAP1 cells in one 6-well were incubated with 1.5 ml of viral supernatant and centrifuged at 1850 rpm for 1 hour. Two days after infection, cells were selected with Puromycin 1  $\mu$ g/ml and maintained for a week in culture in order to allow efficient gene editing.

### Production of retrovirus and lentivirus, and infection of recipient cells

Briefly, retroviral and lentiviral supernatants were produced in HEK-293T cells ( $5 \times 10^6$  cells per 100 mm diameter dish). Vector transfections were performed using Fugene-6 transfection reagent (Roche) according to the manufacturer's protocol. Two days later, viral supernatants (10 ml) were collected serially during the subsequent 48 hours, at 12-hour intervals, each time adding fresh medium to the cells (10 ml). The recipient cells were seeded the previous day ( $1.5 \times 10^5$  cells per well in a 6-well plate) and each well received 1.0 ml of the corresponding retroviral and/or lentiviral supernatants as indicated in each Figure. This procedure was repeated every 12 hours for 2 days (a total of 4 additions).

For lentiviral shRNA production, per dish, 293T cells were transfected with 3 plasmids: (i) the ecotropic lentiviral envelope packaging plasmid pMD2.G (0.3  $\mu$ g; Addgene, plasmid #12259; containing the VsVg gene); (ii) the lentiviral packaging plasmid pCMV-dR8.91 (3.0  $\mu$ g); (from: Harvard Medical School, plasmid #516); (iii) plus either one of the following 6 lentiviral shRNA constructs (3.0  $\mu$ g) expressing mouse shRNAs against RPAP1 (shRPAP1#1-5, respectively), or the corresponding non-targeting control (Scramble, shSCR) vector. After lentiviral infection was completed, lentiviral RPAP1-knockdown shRNA recipient cells were selected with puromycin (1  $\mu$ g/ml). A panel of five lentiviral shRNA against RPAP1 were from Open Biosystems (#RMM4534-NM\_177294; TRC Mission Library) with a pLKO.1 lentiviral backbone. From these 5 clones we identified that the best knockdown of RPAP1 expression was achieved using clone TRCN0000173186, hereafter "shRPAP1#5". See shRNA clone details in **Resource Tables**, in **Supplemental Experimental Procedures**.

For retrovirus, per dish, 293T cells were transfected with the ecotropic packaging plasmid pCL-Eco (4  $\mu$ g) together with one of the following retroviral constructs (4  $\mu$ g): pMXs-Oct4, pMXs-Sox2, pMXs-Klf4, pMXs-cMyc, or pMXs-Nanog (obtained from Addgene and previously described (Takahashi and Yamanaka, 2006) -the backbone is pMXs plasmid in all cases and the expression of the coding sequences of the reprogramming factors are driven by the MMLV LTR promoter.

### **Generation of iPS cells from primary MEFs or i4F-MEFs**

For retroviral-mediated iPS reprogramming of primary (passage 2-4) mouse embryo fibroblasts was performed by a previous protocol (Li et al., 2009a). Briefly, after infection of primary MEFs with retrovirus expressing the four Yamanaka transcription factors (OSKM), as outlined above, MEF media was replaced by KSR/LIF medium (see above). Cultures were maintained in the absence of drug selection with medium changes every 48 hrs (Li et al., 2009a).

For reprogramming of the secondary-system doxycyclin-inducible 4-Factor (i4F) MEFs which inducibly-express the four Yamanaka factors Oct4, Sox2, Klf4, and cMyc (OSKM) was performed as previously described (Abad et al., 2013). Briefly, i4F-MEFs were treated with doxycyclin (1  $\mu$ g/mL) continuously to induce expression of



the OSKM transcription factors in the presence of the KSR/LIF iPS medium described above, which was replaced every 48 hrs..

After 7-10 days, iPS colonies with ES-like morphology were counted as they became visible and were subsequently scored by Alkaline Phosphatase staining according to manufacturer's protocol (AP detection kit, Chemicon International, or, Promega #S3771). Colonies of iPS cells were picked after 2 weeks and expanded on feeder fibroblasts using standard procedures. Sox2-eGFP MEFs (D'Amour and Gage, 2003) were used in iPS reprogramming experiments since they become Sox2-GFP-positive (reflecting activation of the endogenous pluripotency network) only in the final stages of iPS reprogramming (see: **Figures 3E, 3F and S3E**).

### **Growth factors and small molecules to improve iPS reprogramming**

The media supplements to improve iPS reprogramming, at the indicated concentrations shown in Figure S4C, are as follows: FGF2 (R+D Systems #233-FB/CF); EGF (Sigma # E9644); Alki (SB431542; ALK4/5/7 inhibitor; Sigma# #S4317); Forskolin (Sigma # F6886); SCF (R+D Systems #455-MC/CF); DLPC (Lrh1 agonist; Stratech # 850335P); 5-Aza-Deoxycytidine (Sigma # A3656-5MG); VPA (Calbiochem # 676380); TSA (Trichostatin A; Sigma; T8552); BIX (BIX 01294; Tocris #3364); Kenpaullone (Tocris #1398); Flavopiridol (Santa Cruz # CAS 146426-40-6).

### **Differentiation with retinoic acid**

Differentiation of ES cells with retinoic acid (RA) was performed essentially as described (Savatier et al., 1996). LIF was first removed for 24 hrs by culture in LIF-free Differentiation medium (that is DMEM (high glucose) supplemented with serum 15%, non-essential amino acids, glutamax and beta-mercaptoethanol; hereinafter referred as "differentiation medium"). Next, LIF-free differentiation media was supplemented with Retinoic Acid at 10  $\mu$ M from +24 to +72 hrs, followed by LIF-free differentiation medium alone from +72 to +96 hrs. P19EC cell differentiation was by Retinoic Acid addition at 10  $\mu$ M.

### **EB hanging-drop differentiation**

This was performed essentially as described (Marikawa et al., 2009). ES cells were transferred to Differentiation medium (that is DMEM (high glucose) supplemented with serum 15%, non-essential amino acids, glutamax and beta-mercaptoethanol; hereinafter referred as "differentiation medium"), and suspended in hanging drop culture at a cell density of 5000 cells/20  $\mu$ Ls. ES cells were allowed to form spherical aggregates known as Embryoid Bodies (EBs) for 48 hours in the hanging drops before transfer to suspension culture in low-adherence petri-dishes. In suspension culture, fresh Differentiation medium was added every 3 days, and the percent of EBs was scored daily for the development of beating cells in cardiac centres.

### **Wound healing scratch assay**

Three MEF clones were assessed for their ability to migrate and close a scratched region at day 3 +/- RPAP1 depletion. Scratch wounds (12 per experimental condition)

were made in shSCR and shRPAP1 cultures and photographed at both +0 and +24 hrs in order to quantify the percent area of the original damage which remained at +24 hrs, using ImageJ software analyses of the photographs.

### **Cytometry**

FACS was performed as described (Li et al 2009a). Briefly, for SSEA1 analysis, cells were collected by scraping and pipetting to unicellularize, before resuspension in 500  $\mu$ Ls 1xPBS and incubation with anti-SSEA1 antibody conjugated to allophycocyanin (R+D Systems, #FAB2155A) for 15 mins at room temperature. For AnnexinV analysis of apoptosis, the cells were collected by trypsinization before re-suspension in 1x binding buffer and incubation with anti-AnnexinV antibody conjugated to FITC (BD Pharmingen, # 556570). Data were analyzed with FlowJo 9.6.2 software. The percent of cells in S-phase was quantified using the Click-iT EdU staining kit (Invitrogen #C35002). Briefly, cells were exposed to EdU in culture for 45 minutes followed by fixation and staining according to the manufacturer's protocol.

### **Cell lysis and Western blot**

Whole cell extracts were prepared using 50 mM TrisHCl pH8; 1 mM EDTA; 150 mM NaCl; 1% NP40; 0.5% Triton X-100; 1.0% SDS, with freshly added protease inhibitors (Roche #11873580001). A total protein of 10  $\mu$ g was loaded per lane and resolved on NuPAGE 4-12% gradient Bis-Tris gels, transferred to nitrocellulose and hybridized using antibodies as described in **Resource Tables**, in **Supplemental Experimental Procedures**. Nuclear/Cytosolic Fractionation was performed by using the NE-PER Nuclear and Cytoplasmic Extraction Kit by Thermo Scientific, following the manufacturer's instructions.

### **Histopathology and immunohistochemistry**

Mouse tissues were fixed in formalin at 4°C, embedded in paraffin block, and sectioned at a thickness of 5  $\mu$ m. Sections were stained with hematoxylin and eosin for pathological examination or processed for immunohistochemical analysis with antibodies against mouse RPAP1 (for a list of the antibodies used, see **Resource Tables**, in **Supplemental Experimental Procedures**). E3.0 morulae and E4.0 blastocyst embryos were collected in KSOM media (Chemicon #3699) and gently resuspended in 10% Formalin at 4C overnight to fix. Next day, embryos were resuspended in 100-200  $\mu$ ls of sterile 5% gelatin/dH<sub>2</sub>O pre-warmed at 37C, then placed at 4C to allow gelatin solidification, followed by equilibration of the solid gelatin pellet in cold 10% formalin before embedding in paraffin block, and sectioning as above.

### **Immunofluorescence**

Cells were grown on chamber slides using the same protocols as for the rest of the experiments. Briefly, at day 3 after RPAP1 depletion, cells were fixed with 4% paraformaldehyde for 2 minutes at room temperature, washed with PBS and permeabilized with PBS containing 0.02% Tween-20 for 20 minutes. Cells were blocked in PBS with 50% Australian FBS for 1 h and incubated with antibodies against

RPAP1 or Pol II (for a list of the antibodies used, see **Resource Tables**, in **Supplemental Experimental Procedures**) at 1:200 to 1:1000 in PBS-4%BSA, for 3 hrs, washed with PBS and further incubated with secondary anti-rabbit antibodies conjugated with Alexa-488, Alex-555 and/or Alexa-647 (1:500 in PBS-4%BSA). Nuclei were counter-stained with DAPI. Confocal immunofluorescence cell images were captured using a Leica SP5, equipped with white light laser and hybrid detection.

### **RNA Pol II interactome analysis and LC/LC mass spectrometry**

RNA Pol II immunoprecipitation was performed on Day+2 after lentiviral shRNA knockdown of RPAP1 in primary MEFs. Cells were washed x2 with ice-cold 1xPBS, then scrape-harvested in ice-cold 1xPBS. Lysates were prepared from two replicate experiments, sonicated, and clarified by centrifugation at 10C, at 10,000g, for 10 minutes. The supernatants were pre-cleared by exposure to Protein A/G beads (Santa Cruz #sc-2003). The Pol II complex was immunoprecipitated using a cocktail of three antibodies against RPB1/Polr2a, the largest and core catalytic subunit of Pol II, in order to immunoprecipitate Pol II throughout all the stages of transcription. The antibodies targeted the N-terminus of Pol II (Santa Cruz, sc-899x), the Serine5-phosphorylated C-terminal domain (Abcam #5131), and the Serine-2-phosphorylated C-terminal domain (Abcam #5095). The immunoprecipitate fraction was eluted, specific Pol II protein interactors were determined by Mass Spectrometry, and the Pol II-interactome was analysed, as described below.

### **Immunoprecipitate sample preparation for mass spectrometry.**

Proteins were eluted from the agarose beads in two consecutive steps by shaking for 10 min at 1250 rpm in an Eppendorf Thermomixer in 2 bead volumes (~100 µl) of elution buffer (UT: 8M Urea, 100mM Tris-HCl pH=8.0). The supernatant obtained was digested by means of standard FASP (Filter Aided Sample Preparation) protocol (Wiśniewski et al., 2009). Proteins were then reduced with 10 mM DTT, alkylated using 50 mM IAA for 20 min in the dark. Proteins were digested with Lys-C (Wako, Neuss, Germany) for 6 hours (1:50). Finally, samples were diluted in 50 mM ammonium bicarbonate to reduce the urea concentration to less than 1M, and were subsequently digested with Trypsin (Promega, Madison, WI; 1:100 sample concentration, overnight at 37 °C). Resulting peptides were desalted using a Sep-Pak C18 cartridge for SPE (Waters Corp., Milford, MA). Eluted peptides were vacuum-dried. To comprehensively identify the Pol II interactome, peptides were further pre-fractionated into five fractions using high pH reverse phase micro-columns (Batth et al., 2014), packing three discs (16 g diameter) of 3M Empore C18 at the bottom of a conventional 200 µl micropipette tip. After conditioning the tip, peptides were dissolved in 50 µl of Buffer A (20mM NH<sub>3</sub>, pH ≥ 10). Using an adapter, the tip was mounted on a 1.5 ml tube and fit in a benchtop centrifuge. During each fractionation step, centrifuge was operated at 1500 g for 2 minutes until all the volume passed through the C18 membrane. Peptides were subsequently eluted increasing the percentage of Buffer B (20mM NH<sub>3</sub> in CH<sub>3</sub>CN) (i.e. 4, 8, 12, 80%) of Buffer B. All

the five fractions and the flow through were dried by speed-vacuum and resuspended in 22  $\mu$ l 0.5% FA.

### **LC-MS/MS analysis**

The five fractions of the eight different samples were analyzed by RP chromatography using a nanoLC Ultra system (Eksigent, Dublin, CA), directly coupled with a LTQ-Orbitrap Velos instrument (Thermo) via nanoESI (Proxeon Biosystems, Waltham, MA). Peptides were loaded onto a Reprosil-Pur C18 column (3  $\mu$ m, 400x0.075 mm; Dr. Maisch, Ammerbuch-Entringen Germany), with a trapping column (Prot Trap Column 0.3 x 10 mm, ReproSil C18-AQ, 5  $\mu$ m), for 10 minutes with a flow rate of 2.5 L/min of loading buffer (0.1% FA). Elution was performed with a 120 minute linear gradient (buffer A: 2% ACN, 0.1%FA; buffer B: 100% ACN, 0.1%FA) at 300 nl/min. Peptides were directly electrosprayed into the mass spectrometer using a PicoTip emitter (360/20 OD/ID  $\mu$ m tip ID 10  $\mu$ m, New Objective) at 1.4 kV spray voltage with a heated capillary temperature of 325°C and S-Lens of 60%. Mass spectra were acquired in a data-dependent manner, with an automatic switch between MS and MS/MS scans using a top 10 method. MS spectra were acquired with a resolution of 60,000 (FWHM) at 400 m/z in the Orbitrap, scanning a mass range between 350 and 1500 m/z (AGC = 1e6, Max IT = 500 ms). Peptide fragmentation was performed using collision-induced dissociation (CID) with read out in the ion trap (AGC = 5e3, Max IT = 100 ms) and a normalized collision energy of 35%.

### **Protein Pol II-interactome data collection and analysis**

Forty raw files (i.e. two experiments “SCR-Pol II vs SCR-IgG” and “shRPAP1-Pol II vs shRPAP1-IgG” with two biological replicates each and fractionated into five fractions), were analyzed using MaxQuant 1.5.3.30 (Cox and Mann, 2008) with Andromeda (Cox et al., 2011) as the search engine against a *Mus musculus* database (UniProtKB/Swiss-Prot, 43,539 sequences). Carbamidomethylation of cysteine was included as fixed modification and oxidation of methionine, acetylation of protein N-terminal were included as variable modifications. Precursor mass tolerance was 20 ppm for the first search, and 4.5 ppm for the main search. Fragment mass tolerance was set to 0.5 Da. Minimal peptide length was set to 6 amino acids and a maximum of two missed-cleavages were allowed. Peptides were filtered at 1% FDR. For protein assessment (FDR <1%) in MaxQuant, at least one unique peptide was required for both identification and quantification. Other parameters were set as default. A total of 4,384 proteins were identified. Afterwards, the “protein-group” file was loaded in Perseus (v1.5.1.6) (Tyanova et al., 2016). After removing proteins annotated as contaminants, only identified by site and/or reversed a total of 3,944 proteins were quantified. Missing values in the IgG runs were replaced by the minimum LFQ value (i.e. 10) detected in the whole experiment. Using the LFQ values, all four possible pairwise comparisons between the two biological replicates of “SCR-Pol II vs SCR-IgG” were calculated. The same four comparisons were calculated for the “shRPAP1-Pol II vs shRPAP1-IgG” experiments. A protein was declared as specific interactor when the log<sub>2</sub> enrichment ratio against its IgG was larger than 2.5 in three out of the four

comparisons in at least one of the two IP experiments. In total, 294 proteins were found as specific interactors (see **Table S4**). Among them, we identified all the subunits of the RNA pol II complex (12 proteins) and 28 out of 30 subunits of the Mediator complex. To identify interactors affected upon RPAP1 depletion, the data were normalized using the RPB1/Polr2a bait protein levels. Then, all four possible pairwise comparisons between “shRPAP1-Pol II vs SCR-Pol II” experiments were calculated, and proteins were declared to be decreasing in the shRPAP1 if the log<sub>2</sub> ratio was smaller than -1.5 in three out of the four comparisons. Proteins were declared to be increasing in the shRPAP1-Pol II if the log<sub>2</sub> ratio was larger than 1.5 in three out of the four comparisons. The RPB1/Polr2a interactome in cells treated with the shRPAP1 showed alterations, specifically 104 interactors were absent or significantly reduced, while 5 new interactors were found (see **Table S4**). The mass spectrometry proteomics data have been deposited to the ProteomeXchange Consortium via the PRIDE (Vizcaino et al., 2016) partner repository with the dataset identifier PXD007114.

### **Protein Pol II-interactome functional analysis**

The interactors found to be affected in the RPAP1-depleted cells were functionally categorized using Panther database (<http://pantherdb.org>) by GO molecular function, GO biological process and GO cellular component. Statistical over-representation of GO terms (mouse genome was used as the background data set) was determined with a Binomial test and used the Bonferroni correction for multiple testing. P-values were then  $-\log_{10}$  transformed for better graphical representation. These analyses revealed that the affected interactors in shRPAP1 were enriched in processes related to transcription and splicing ( $p < 0.00001$ ) (**Figure S4E**).

To find out whether these affected pol II-interactor proteins belong to specific complexes, we mapped our interactome data to the Corum database (Comprehensive resource of mammalian protein complexes) (<http://mips.helmholtz-muenchen.de/corum/>) that contains more than 3000 manually curated mammalian protein complexes. The number of subunits identified in the interactome data (specific interactors) for each known complex was retrieved. The same mapping was done with the list of interactors found to be affected in the RPAP1-depleted cells. Corum complexes with less than 6 subunits were not considered and redundant complexes (those sharing identical subsets of proteins) were also removed. Several well-known complexes were represented in our dataset of Pol II-interactors which were affected by RPAP1 depletion (**Table S4**). Among them, the Mediator complex (which is formed by 30 subunits) was ranked the highest (**Figure 4E**) with eleven subunits affected following RPAP1 depletion (MED27, MED28, MED9, MED13, MED25, MED22, MED29, MED10, MED31, CDK8, MED14) indicating an important alteration in the functions controlled by this complex.

### **RNA isolation and quantitative real-time PCR (qPCR)**

Total RNA was extracted from cells on column by RNeasy kit with DNA digestion following provider's recommendations (Qiagen #74104) and retro-transcribed into cDNA following manufacturer's protocol with Superscript Reverse Transcriptase (Life



Technologies). Quantitative real time-PCR was performed using Syber Green Power PCR Master Mix (Applied Biosystems) in an ABI PRISM 7700 thermocycler (Applied Biosystem). Input normalization of all the qRT-PCR data was by the  $2^{-\Delta\Delta C_t}$  method (Yuan et al., 2006) using the housekeeping genes  $\beta$ -Actin or Gapdh as indicated in each Figure, and as described (Ortega-Molina et al., 2015). Primers used are in **Resource Tables**, in **Supplemental Experimental Procedures**.

### **RNA-seq transcriptomic analyses**

For RNA-seq, samples of 1  $\mu$ g of total RNA, with RIN numbers in the range 9.8 to 10 (Agilent 2100 Bioanalyzer), was used. PolyA+ fractions were processed using TruSeq Stranded mRNA Sample Preparation Kit (Agilent). Adapter-ligated library was completed by PCR with Illumina PE primers (8 cycles). The resulting directional cDNA libraries were sequenced for 40 bases in a single-read format (Genome Analyzer Iix, Illumina). The complete set of reads has been deposited in GEO (GSE78795). Sequencing quality for RNA-seq samples was analyzed with FastQC. Reads were aligned to the mouse genome (GRCm38/mm10) with TopHat-2.0.4 (Trapnell et al., 2012) (using Bowtie 0.12.7 (Langmead et al., 2009) and Samtools 0.1.16 (Li et al., 2009c), allowing two mismatches and five multi-hits. Transcripts assembly, estimation of their abundance, and differential expression, were calculated with Cufflinks 1.3.0 (Trapnell et al., 2012), using the mouse genome annotation data set GRCm38/mm10 from the UCSC Genome Browser (Rosenbloom et al., 2015).

### **Functional analyses of differential gene expression**

For differential gene expression lists (see data in **Table S1**: ES cells +24hr differentiation; or **Table S3**: MEFs at day 3 after RPAP1 depletion). Genes were ranked using the FDR q-value statistic to identify significant genes (FDR<0.05 or FDR<0.01, as indicated in the Figures), then by fold change in expression. Selected differentially-expressed genes identified in the RNA-seq were validated by qPCR. Venn diagrams were generated by JVenn (Bardou et al., 2014) and hypergeometric testing was performed to assess any significant overlaps. Pathway analyses were by Ingenuity Pathway Analysis software ([www.ingenuity.com](http://www.ingenuity.com)). Gene Set Enrichment Analysis (GSEA; Subramanian et al., 2005). GSEAPre-ranked was used to perform a gene set enrichment analysis of annotations from the MsigDB Hallmarks, C5-Gene Ontology (GO) terms, C2-Curated, KEGG, Reactome and NCI databases, with standard GSEA and Leading Edge analysis settings. We used the RNA-seq gene list ranked by statistic, setting 'gene set' as the permutation method and ran it with 1000 permutations for Kolmogorov-Smirnoff correction for multiple testing. We considered only those gene sets with significant enrichment levels (FDR q-value <0.25) (Subramanian et al., 2005) (see: **Table S2**). GSEA Enrichment data were obtained and ranked according to their FDR q-value (see: **Table S2**). Heatmaps of GSEA data (**Figures 2H and 5F**) or qPCR data (**Figure 3G**) were generated using Gene Pattern (Reich et al., 2006).

### **Supervised network analysis**

Investigation of differential gene expression for dominant gene-ontologies or functions was performed by supervised network analyses. Briefly, network analyses were performed starting from the list of differentially expressed genes induced by RPAP1 depletion followed by 24hrs of ES differentiation, or separately, RPAP1 depletion for 3 days in MEFs. Next these lists were used to find gene interaction information in the Metacore™ database, including manually curated experimentally validated interaction data. The interaction datasets generated (including information of the interaction direction –i.e. source and target genes, and interaction effect –i.e. inhibition or activation) were contextualized for obtaining the gene regulatory networks of the RPAP1-depletion and control phenotypes, using an algorithm developed in-house (Crespo et al., 2013; Zickenrott S et al., 2016). Finally, the phenotype-specific networks were compared to identify the pathway enrichment in genes in the “up-regulated” or “down-regulated” lists. In this comparison, we estimate the statistical significance (i.e. enrichment) of the interactions among genes in each category, which constitute an indication of the differences in the regulatory mechanisms underlying the phenotypical changes caused by RPAP1 depletion. See **Table S1, sheets#6-11**; and **Table S3, sheets#6-10**.

### **Comparison of differential gene expression with the iPS roadmap**

Gene expression changes have been comprehensively characterized in the subset of successfully-progressing cells during iPS reprogramming by overexpression of the OSKM Yamanaka factors (Polo et al., 2012; Hansson et al., 2012). We first identified the gene expression changes which occur between day 0 and day +3, or between day 0 and day +9, of successful iPS reprogramming by comparing RNA-seq data in the parental MEFs (day 0) versus day +3 (or day +9) Thy1-negative cells in the published datasets. Next, we used GSEA to compare these iPS roadmap genesets of top 100 or top 500 up- or down-regulated mRNAs versus the complete ranked list of differential gene expression in MEFs at day 3 after RPAP1 depletion. We also performed the analysis in reverse, comparing the genesets of significantly differentially expressed mRNAs up- or down-regulated in MEFs at day 3 after RPAP1 depletion, versus, the complete ranked list of differential gene expression at day 3 (or day 9) of the iPS roadmap. GSEA results are shown in **Figure 3A and S3A and S3B**. Data with  $P < 0.05$  and  $FDR < 0.25$  are considered significant.

### **Conversion of plant gene expression data to mammalian homologs**

The effect of RPAP1-mutation on mRNA expression levels was previously published in Arabidopsis (Sanmartin et al., 2011). We converted the published data from plant (31,200 genes; see: **Table S2, sheet#4**) to mammal (mouse) via protein sequence similarity (**Table S2, sheets #5 and #6**), filtering the data by three thresholds: (i) “100% coverage”, that is, the whole plant protein is included in the alignment against whole mouse proteins; (ii) the best “% Amino Acid Identity” possible, always greater than 20% (% of amino acids that are totally conserved in both sequences); (iii) the best “% Positive Amino Acids” as possible (this takes into account synonymous amino acids (that is based on similarity in terms of size and charge)). We filtered out: 250 genes that

did not map (neither in Arabidopsis TAIR 10 database nor in Ensembl), and a further 1933 Arabidopsis genes were without homology/orthology in mouse, however, the majority of these were transposons (**Table S2, sheet#7**). We ran GSEA using the MSigDB Hallmark, C5-GO terms, and C2-Curated databases against the entire remaining ranked list of homologous plant proteins/genes (for the ranked list of genes converted to mouse, see **Table S2, sheets #5 and #6**) to identify significant genesets up or down-regulated by RPAP1-mutation in plants which have a homolog in mouse (see summary of results in **Table S2, sheet #7**). In **Figure 5F**, the heatmap compares the GSEA hallmark database analysis from the plant-mammal conversion above (**Table S2, sheet #7**), versus, the GSEA hallmark database analyses results for three other experiments: (i) GSEA on the ranked list of differential mRNA expression in MEFs at day 3 +/- RPAP1-depletion; (ii) GSEA on the ranked list of differential mRNA expression in ES cells at +24hrs after inducing differentiation, +/- RPAP1-depletion; (iii) GSEA on the ranked list of differential RNA Pol II abundance at the promoter at day 3 +/- RPAP1 depletion.

### **Chromatin immunoprecipitation (ChIP) and deep-sequencing**

ChIP-qPCR was performed as described (Li et al., 2012) with primers listed in **Resource Tables, in Supplemental Experimental Procedures** and antibodies for Total Pol II (Santa Cruz N20, sc-899x) and RPAP1 (Cosmo Bio MK14030910). ChIP-seq for Pol II was performed as described (Rahl et al., 2010). Briefly, cells were fixed using 1% formaldehyde, scrape-harvested, resuspended in ChIP lysis buffer (1% SDS, 10mM EDTA, 50mM Tris-HCl, pH 8.1) and sonicated using Covaris water bath sonicator to generate fragments of 150 to 500 bp. Soluble chromatin was diluted 10 fold in ChIP Dilution buffer (1% Triton X-100, 2 mM EDTA pH 8.0, 150 mM NaCl) precleared with Agarose Protein A/G beads (Santa Cruz), and then incubated with antibody specific for total RNA Pol II (N-20, sc-899x, Santa Cruz) or specific for the RNA Pol II Ser5P-phosphorylated form (Abcam #ab5131). After incubation, immunocomplexes were collected with Agarose Protein A/G beads (Santa Cruz). Next, the immunocomplexes were washed sequentially with Low Salt Wash Buffer (0.1% SDS, 1% Triton X-100, 2mM EDTA, 20mM Tris-HCl, pH 8.1, 150mM NaCl), High Salt Wash Buffer (0.1% SDS, 1% Triton X-100, 2mM EDTA, 20mM Tris-HCl, pH 8.1, 500mM NaCl), LiCl Wash Buffer (0.25M LiCl, 1% NP40, 1% deoxycholate-Na, 1mM EDTA, 10mM Tris-HCl, pH 8.1) and washed twice with TE (10 mM Tris-HCl pH7.5, 1mM EDTA). Immunocomplexes were eluted in ChIP elution buffer (1%SDS, 0.1M NaHCO<sub>3</sub>) and the crosslinking was reverted by incubation at 65 °C for 8 hrs with 200 mM NaCl. Samples were treated with Proteinase K and RNase A, and DNA was extracted using Phenol-Chloroform. DNA precipitation was in 100% ethanol with 0.1 M NaAcetate pH5.2 and 2 uLs glycogen (Roche). The DNA pellet was washed with 70% ethanol, and resuspended in ddH<sub>2</sub>O. Purified chromatin was used for library construction.

For ChIP-seq the amount of DNA used was ~5 ng from each sample (as quantitated by fluorometry). Samples were processed through subsequent enzymatic treatments of end-repair, dA-tailing, and ligation to adapters as in Illumina's "TruSeq

DNA Sample Preparation Guide" (part # 15005180 Rev. C). Adapter-ligated libraries were completed by limited-cycle PCR with Q5 High-Fidelity DNA Polymerase (NEB) and Illumina PE primers (15 cycles), and further purified with a double-sided SPRI size selection to obtain a size distribution in the range of 230-500bp. Libraries were applied to an Illumina flow cell for cluster generation (TruSeq cluster generation kit v5) and sequenced on the Genome Analyzer IIx with SBS TruSeq v5 reagents by following manufacturer's protocols, to 20-25 million reads per sample.

### **Pol II ChIP-seq data analyses**

Definition of promoter and gene body regions (See: **Figure S5B**) and the calculation of Pol II total and Ser5P abundance along genes was based on methods of Young and colleagues (Rahl et al., 2010) (see **Table S5**). Sequencing quality for ChIP-seq samples was analyzed with FastQC (Andrews, 2011). Reads were aligned with Bwa 0.7.5a (Li and Durbin, 2009) to the mouse reference genome (GRCm38/mm10) using the default seed length (32) and allowing 1 mismatch in the seed. SAMtools 0.1.16 (Li et al., 2009b) was used to convert the output alignment SAM files to the BAM file format, sort the alignments and eliminate duplicated reads. BEDTools 2.23.0 (Quinlan, 2014) was used to convert the resulting files to the BED format. All ChIP and input samples were randomly normalized to the same number of reads. Peak calling was performed with MACS 2.0.10.20130712 (Feng et al., 2012) using the input sample as control for each one of the ChIP samples. BigWig files were obtained with bedGraphToBigWig (Kent et al., 2010) from the BedGraph files generated with MACS. Resulting peaks were annotated with PeakAnalyzer 1.4 (Salmon-Divon et al., 2010), and the distribution of peaks was plotted with SeqMiner 1.3.3e (Ye et al., 2014) with color-scaled intensities are in units of reads per million mapped reads (rpm). Transcription Start Sites (TSS) and Transcription Termination Sites (TTS) were identified using the Database of Transcriptional Start Sites (<http://dbtss.hgc.jp>). Metagenes were aligned +/- 5 Kb around the TSS. The Pausing Index (PI) for gene promoters versus gene bodies was calculated as described (Rahl et al., 2010; see also **Figure S5B**). First, the number of reads per nucleotide was computed with BEDTools 'genomecov'; second, to extend this number to the number of reads per gene promoter or gene body, BEDTools 'map' was used; and third, the Promoter/Body ratio, or Pausing Index (PI) was calculated for each gene promoter or gene body as  $PI = ((\text{number of reads in region} / \text{region size}) * \text{scaling factor}) * 10^5$ . Scaling factor = (total number of reads in sample/genome length).

### **Definition of MEF super-enhancers, their target genes, and their eRNA levels**

For **Figure 1I**, H3K27ac enrichment before/after ES cell differentiation was defined by H3K27ac ChIP-seq as previously described (Creyghton et al., 2010) using datasets with the following Accession numbers: GSE24164, GSM594578, GSM594585. For **Figure 5G**: MEF super-enhancers were defined by H3K27ac ChIP-seq signal and ranking by ROSE, as previously described (Whyte et al., 2013; Shen et al., 2012; Khan and Zhang, 2016; dbSUPER, <http://bioinfo.au.tsinghua.edu.cn/dbsuper/>). To identify the single-nearest target gene to each MEF super-enhancer, GREAT analysis was performed as described (GREAT v3.0.0; McLean et al., 2010). In **Figure 5G**, this geneset of MEF

super-enhancer target genes was used in GSEA analysis of the mRNA expression levels of these genes at day 3 after RPAP1 knockdown in primary MEFs in our data.

For **Figure 5H**: the same MEF super-enhancer regions were assessed for enhancer-RNA (eRNA) abundance which has been reported to be proportional to enhancer activity (Andersson et al., 2014). MEF super-enhancers grouped by K-means clustering according to changes in their eRNA levels at day 3 after RPAP1 knockdown into 3 groups: increased (~10%, n=64), decreased (~10%, n=63), no-change/not-detected (~80%). In **Figure 5H**, average RNA abundance on the super-enhancers with increased or decreased eRNA levels was visualized in 50 bp bins from start to end of feature using SeqMINER (Ye et al., 2014).

For **Figure S5G**, GSEA was performed as described above for **Figure 5G**, except here, in order to assess any changes in housekeeper mRNA expression levels. No significant change in housekeeper gene expression was detected, despite performing GSEA using the following housekeeper genesets: (i) a full set of 3384 housekeeper genes (defined in Eisenberg and Levanon, 2013); (ii) 10 sets of 500 genes, each randomly selected from the full 3384 housekeepers, performed so that the individual genes could be visualized in the GSEA enrichment plot. The data shown in **Figure S5G** is representative of one of the random selections of 500 housekeeper genes from the above list of 3384 genes where no significant change in housekeeper mRNA was detected.

For **Figures S5H, S5I, and S5J**: GREAT analysis (GREAT v3.0.0; McLean et al., 2010) was performed on the following two groups of super-enhancers, defined above, to identify the single-nearest target gene of each super-enhancer: (i) super-enhancers with increased eRNA levels (**Figure S5H**); (ii) super-enhancers with decreased eRNA levels (**Figures S5I and S5J**). Next, these two enhancer-target-gene groups were assessed separately for any enrichments in their functions (Gene Ontology Biological process) or the developmental stage associated with their expression (MGI Expression-Detected; Theiler Stage of embryo development). The data is presented in **Figures S5H to S5J**. In **Figure 5I**, the Theiler Stage of embryo development associated with these two enhancer-target-gene groups (the enhancers with increased or decreased eRNA/activity levels) is shown, together with the approximate embryo day-post-coitus (dpc) (emouseatlas.org; Bard et al., 1998). Super-enhancers with decreased eRNA levels (and thus putatively decreased activity) were associated with target-genes expressed during the period embryo dpc E11.5-E17. Conversely, super-enhancers with increased eRNA levels (and thus putatively increased activity) were associated with target-genes expressed during the period embryo dpc E8-E13. Since primary MEFs derive from E13.5, the decrease in activity of enhancers associated with E11.5-E17, coupled with the increase in activity of enhancers associated with E8-E13 mirrors the gene expression analysis in **Figure 2**, where MEFs at Day3 after RPAP1 knockdown appear to have de-differentiated, and in **Figure 3**, where this pattern of de-differentiation correlates significantly with the first 3 days of iPS reprogramming when MEF cell identity is erased (Polo et al., 2012).

## QUANTIFICATION AND STATISTICAL ANALYSIS

Unless otherwise specified quantitative data are presented as mean +/- SD and significance was assessed by the two-tailed Student's t test; \*p<0.05, \*\*p<0.01, \*\*\*p<0.001.

## **DATA AND SOFTWARE AVAILABILITY**

**Data Resources. Accession Numbers:** Three datasets (two RNA-seq and one ChIP-seq experiment) are available from the GEO database: GSE78795. The mass spectrometry proteomics data are available from the ProteomeXchange Consortium/PRIDE repository with the dataset identifier PXD007114.

## **SUPPLEMENTAL REFERENCES**

Abad M, Mosteiro L, Pantoja C, Cañamero M, Rayon T, Ors I, Graña O, Megías D, Domínguez O, Martínez D, et al. (2013). Reprogramming in vivo produces teratomas and iPS cells with totipotency features. *Nature* 502, 340-345.

Andersson R, Gebhard C, Miguel-Escalada I, Hoof I, Bornholdt J, Boyd M, Chen Y, Zhao X, Schmidl C, Suzuki T, et al. (2014). An atlas of active enhancers across human cell types and tissues. *Nature* 507, 455-461.

Andrews, S (2011). FastQC, a quality control tool for high throughput sequence data. <http://www.bioinformatics.babraham.ac.uk/projects/fastqc/>

Bard JBL, Kaufman MH, Dubreuil C, Brune RM, Burger A, Baldock RA, and Davidson DR. (1998). An internet-accessible database of mouse developmental anatomy based on a systematic nomenclature. *Mech. Develop.* 74, 111-120.

Bardou P, Mariette J, Escudié F, Djemiel C, and Klopp C. (2014). Jvenn: an interactive Venn diagram viewer. *BMC Bioinformatics* 15, 293.

Batth TS, Francavilla C, and Olsen JV. (2014). Off-line high-pH reversed-phase fractionation for in-depth phosphoproteomics. *J Proteome Res.* 13, 6176-6186.

Cox J, and Mann M. (2008). MaxQuant enables high peptide identification rates, individualized p.p.b.-range mass accuracies and proteome-wide protein quantification. *Nat. Biotech.* 26, 1367-1372.

Cox J, Neuhauser N, Michalski A, Scheltema RA, Olsen JV, and Mann M. (2011). Andromeda: a peptide search engine integrated into the MaxQuant environment. *J. Proteome Res.* 10, 1794-1805.

Crespo I, Krishna A, Le Béchech A, and Del Sol A. (2013). Predicting missing expression values in gene regulatory networks using a discrete logic modeling optimization guided by network stable states. *Nucleic Acids Res.* *41*, e8.

Creyghton, M.P., Cheng, A.W., Welstead, G.G., Kooistra, T., Carey, B.W., Steine, E.J., Hanna, J., Lodato, M.A., Frampton, G.M., Sharp, P.A., et al. (2010). Histone H3K27ac separates active from poised enhancers and predicts developmental state. *Proc. Natl. Acad. Sci.* *107*, 21931–21936.

D'Amour KA, and Gage FH. (2003). Genetic and functional differences between multipotent neural and pluripotent embryonic stem cells. *PNAS* *100*, 11866-11872.

Eisenberg E, and Levanon EY. (2013). Human housekeeping genes, revisited. *Trends Genet.* *29*, 569-574.

Feng J, Liu T, Qin B, Zhang Y, and Liu XS. (2012). Identifying ChIP-seq enrichment using MACS. *Nat. Protoc.* *7*, 1728-1740.

Langmead B, Trapnell C, Pop M, and Salzberg SL. (2009). Ultrafast and memory-efficient alignment of short DNA sequences to the human genome. *Genome Biol.* *10*, R25.

Kent WJ, Zweig AS, Barber G, Hinrichs AS, and Karolchik D. (2010). BigWig and BigBed: enabling browsing of large distributed datasets. *Bioinformatics* *26*, 2204-2207.

Khan A, and Zhang X. (2016). dbSUPER: a database of super-enhancers in mouse and human genome. *Nucleic Acid Res.* *44*, D164-171.

Li H, Collado M, Villasante A, Strati K, Ortega S, Cañamero M, Blasco MA, and Serrano M. (2009a). The Ink4/Arf locus is a barrier for iPS cell reprogramming. *Nature* *460*, 1136-1139.

Li H, Collado M, Villasante A, Matheu A, Lynch CJ, Cañamero M, Rizzoti K, Carneiro C, Martínez G, Vidal A et al. (2012). p27(Kip1) directly represses Sox2 during embryonic stem cell differentiation. *Cell Stem Cell* *11*, 845-852.

Li H, and Durbin R. (2009b). Fast and accurate short read alignment with Burrows-Wheeler Transform. *Bioinformatics* *25*, 1754-1760.

Li H, Handsaker B, Wysoker A, Fennell T, Ruan J, Homer N, Marth G, Abecasis G, Durbin R, and 1000 Genome Project Data Processing Subgroup. (2009c). The Sequence Alignment/Map format and SAMtools. *Bioinformatics* *25*, 2078-2079.



Lopez-Guadamillas E, Fernandez-Marcos PJ, Pantoja C, Muñoz-Martin M, Martínez D, Gómez-López G, Campos-Olivas R, Valverde AM, and Serrano M. (2016). p21<sup>Cip1</sup> plays a critical role in the physiological adaptation to fasting through activation of PPAR $\alpha$ . *Sci. Rep.* 6, 34542.

Marikawa Y, Tamashiro DA, Fujita TC, and Alarcón VB. (2009). Aggregated P19 mouse embryonal carcinoma cells as a simple in vitro model to study the molecular regulations of mesoderm formation and axial elongation morphogenesis. *Genesis* 47, 93-106.

McLean CY, Bristor D, Hiller M, Clarke SL, Schaar BT, Lowe CB, Wenger AM, and Bejerano G. (2010). GREAT improves functional interpretation of cis-regulatory regions. *Nat. Biotechnol.* 28, 495-501.

Munoz P, Blanco R, Flores JM, and Blasco MA. (2005). XPF nuclease-dependent telomere loss and increased DNA damage in mice overexpressing TRF2 result in premature aging and cancer. *Nat. Genet.* 37, 1063-1071.

Muñoz-Espín D, Cañamero M, Maraver A, Gómez-López G, Contreras J, Murillo-Cuesta S, Rodríguez-Baeza A, Varela-Nieto I, Ruberte J, Collado M, et al. (2013). Programmed cell senescence during mammalian embryonic development. *Cell* 155, 1104-1118.

Palmero, I and Serrano, M. (2001). Induction of senescence by oncogenic Ras. *Methods Enzymol.* 333, 247-256.

Polo JM, Anderssen E, Walsh RM, Schwarz BA, Nefzger CM, Lim SM, Borkent M, Apostolou E, Alaei S, Cloutier J, et al. (2012). A molecular roadmap of reprogramming somatic cells into iPS cells. *Cell* 151, 1617-1632.

Quinlan AR. (2014). BEDTools: The Swiss-Army Tool for Genome Feature Analysis. *Curr. Protoc. Bioinformatics* 47, 11.12.1-11.12.34.

Ran FA, Hsu PD, Wright J, Agarwala V, Scott DA, and Zhang F. (2013). Genome engineering using the CRISPR-Cas9 system. *Nat. Protoc.* 8, 2281-2308.

Reich M, Liefeld T, Gould J, Lerner J, Tamayo P, and Mesirov JP. (2006). GenePattern 2.0. *Nat. Genet.* 38, 500-501.

Rosenbloom, KR, Armstrong J, Barber GP, Casper J, Clawson H, Diekhans M, Dreszer TR, Fujita PA, Guruvadoo L, Haeussler M, et al. (2015). The UCSC Genome Browser database: 2015 update. *Nucleic Acids Res.* 43, D670-681.

Ruiz S, Panopoulos AD, Herrerías A, Bissig KD, Lutz M, Berggren WT, Verma I, and Izpisua Belmonte JC. (2010). A high proliferation rate is required for somatic cell reprogramming and maintenance of human embryonic stem cell identity. *Curr. Biol.* *21*, 45-52.

Ruiz S, Mayor-Ruiz C, Lafarga V, Murga M, Vega-Sendino M, Ortega S, and Fernández-Capetillo O. (2016). A genomewide CRISPR screen identifies CDC25A as a determinant of sensitivity to ATR inhibitors. *Mol. Cell* *62*, 307-313.

Salmon-Divon M, Dvinge H, Tammoja K, and Bertone P. (2010). PeakAnalyzer: genome-wide annotation of chromatin binding and modification loci. *BMC Bioinformatics* *11*, 415.

Savatier P, Lapillonne H, van Grunsven LA, Rudkin BB, and Samarut J. (1996). Withdrawal of differentiation inhibitory activity/leukemia inhibitory factor up-regulates D-type cyclins and cyclin-dependent kinase inhibitors in mouse embryonic stem cells. *Oncogene* *12*, 309-322.

Shen Y, Yue F, McCleary DF, Ye Z, Edsall L, Kuan S, Wagner U, Dixon J, Lee L, Lobanenkov VV, et al. (2012). A map of the cis-regulatory sequences in the mouse genome. *Nature* *488*, 116-120.

Subramanian A, Tamayo P, Mootha VK, Mukherjee S, Ebert BL, Gillette MA, Paulovich A, Pomeroy SL, Golub TR, Lander ES, et al. (2005). Gene set enrichment analysis: a knowledge-based approach for interpreting genome-wide expression profiles. *Proc. Natl. Acad. Sci.* *102*, 15545-15550.

Takahashi K, and Yamanaka S. (2006). Induction of pluripotent stem cells from mouse embryonic and adult fibroblast cultures by defined factors. *Cell* *126*, 663-676.

Trapnell C, Roberts A, Goff L, Pertea G, Kim D, Kelley DR, Pimentel H, Salzberg SL, Rinn JL, and Pachter L. (2012). Differential gene and transcript expression analysis of RNA-seq experiments with TopHat and Cufflinks. *Nat. Protoc.* *7*, 562-578.

Tyanova S, Temu T, Sinitcyn P, Carlson A, Hein M, Geiger T, Mann M, and Cox, J. (2016). The Perseus computational platform for comprehensive analysis of (prote)omics data. *Nat. Methods* *13*, 731-740.

Vizcaíno JA, Csordas A, del-Toro N, Dianas JA, Griss J, Lavidas I, Mayer G, Perez-Riverol Y, Reisinger F, Ternent T, et al. (2016). 2016 update of the PRIDE database and related tools. *Nucleic Acids Res.* *44*, D447-D456.

Whyte WA, Orlando DA, Hnisz D, Abraham BJ, Lin CY, Kagey MH, Rahl PB, Lee TI, and Young RA. (2013). Master transcription factors and mediator establish super-enhancers at key cell identity genes. *Cell* 153, 307-319.

Wiśniewski JR, Zougman A, Nagaraj N, and Mann M. (2009). Universal sample preparation method for proteome analysis. *Nat. Methods* 6, 359-362.

Ying QL, Wray J, Nichols J, Batlle-Morera L, Doble B, Woodgett J, Cohen P, and Smith A. (2008). The ground state of embryonic stem cell self-renewal. *Nature* 453, 519-523.

Ye T, Ravens S, Krebs AR, and Tora L. (2014). Interpreting and visualizing ChIP-seq data with the seqMINER software. *Methods Mol. Biol.* 1150, 141-152.

Yuan JS, Reed A, Chen F, and Stewart CN. (2006). Statistical analysis of real-time PCR data. *BMC Bioinformatics* 7, 85.

Zickenrott S, Angarica VE, Upadhyaya BB, and Del Sol A. (2016). Prediction of disease-gene-drug relationships following a differential network analysis. *Cell Death Dis.* 7, e2040.
